# Supplementary material
Source: Preprints.org preprint supplement (doi:10.20944/preprints201909.0251.v1)
Supplement: Supplementary file 1 [file supplementary]

## Sheet: S2A
Unigene ID	Function	Expression	Primers names	Primers sequences	Product size (bp)
DN94003_c0_g1	Flavin reductase (NADPH)	Up	DN94003_1_F	TTGATGAGTTTCTGCCCGTCT	102
			DN94003_102_R	GTCTGTGGCAGAGACTGGG
DN15491_c0_g1	Copper resistance protein A homolog	Up	DN15491_88_F	GCTTGGAAGGCAGTGGAAAC	123
			DN15491_210_R	TCTTCCGATCTCGACCCCAT
DN105876_c0_g1	SOUL heme-binding protein	Up	110_F	ACACCAGCAAAGAGAGCCTG	135
			244_R	CCTTCGTCTTCGCCTCCTTT
DN100532_c0_g1	Putative metal chaperone YciC	Up	371_F	AGACAGTCAAAGCCCTCAGC	168
			538_R	GACCGTGTTTGTGTTGGTCG
DN93840_c0_g1	Putative metal chaperone YciC	Up	1319_F	TCCCCGAGGAGGAATGGAAT	142
			1460_R	TGCAGGATACGGGGTTTGTC
DN39445_c0_g1	Inhibitor of apoptosis-promoting Bax1(Protein lifeguard 3)	Up	69_F	GACGGCAGGGATCACGATAG	154
			22_R	GTTCTTGAACGCGGTGAACC
DN99597_c0_g1	NADH dehydrogenase	Up	856_F	AACCGCATTCTTCCCGTCTT	145
			1000R	GCAGTTCTTCCCCAGAGGTC
DN63627_c0_g1	Putative metal chaperone YciC	Up	33_F	CTGGGATCGGGAAAGACGAC	126
			158_R	TTTCCCTTCCCGAATGAGCC
DN109925_c0_g1	Inhibitor of apoptosis-promoting Bax1(Protein lifeguard 3)	Up	6_F	GCGCCCTAACGACATTGAAC	187
			192_R	GTAGGGCTTATCGGTGGCTC
DN112103_c0_g1	Catalase-peroxidase 2	Up	227_F	CGGATGGGGTCCTGAAAGAG	119
			345_R	AAATTCGCAGACGCATTCCG
DN107579_c0_g1	Thioredoxin	Up	DN107579_160_F	AGTTTTGCCCTCTCTCTGCC	105
			264_R	AATCCCGACAAGCTGCATGA
DN111844_c0_g1	Cytochrome P450	Up	87_F	CCAGCAGAAGAACAGGACGT	117
			203_R	TCGGAAGTCGTCAGCATCAG
DN106578_c0_g1	Cytochrome P450	Up	289_F	GGCAGGTAGTCGTCGTTCTT	142
			430_R	AGGAGACCAAGGGAGGAGAC
DN110970_c0_g1	Cytochrome P450	Up	DN110970_160_F	ACACCCTGATTGCCCGAATT	151
			310_R	AGCTTCTCTGGGTGCTTCAC
DN110970_c1_g1	Cytochrome P450	Up	375_F	ACTGTGTGGGCATGAACCTT	132
			506_R	GCTTTGCGATGGCGTATGTT
DN111402_c0_g1	Bifunctional P-450/NADPH-P450 reductase	Up	104_F	CCTGGTGACTGTGTGTTGGA	147
			250_R	TTGGGTGTCTCTTCCTGGGA
DN111402_c1_g1	Bifunctional P-450/NADPH-P450 reductase	Up	39_F	AGCACCTGACTGTCGTTGAG	104
			142_R	GCTGTAGTACCTCGGTTGCA
DN110990_c0_g1	glutathione synthase	Up	1_F	GGTGAGGAAGGCACTGAGTC	141
			141_R	CCACGAGGAGGTCTATTGCC
DN104224_c0_g1	NmrA-like family	Up	129_F	GGCCTTCTTGGAATTCCCGA	149
			227_R	CGAACGTGGTCGAGAGAGAC
DN119911_c0_g1	Carbonic anhydrase	Up	27_F	GAGTCGGCACAAGACAGGAA	113
			139_R	AACGAGCGCTTCACTAGAGG
DN85292_c0_g1	type 2 phosphatidic acid phosphatase (PAP2)	Up	60_F	AGGTTTTGCAGTCTTCCCGA	120
			179_R	ACTTGGAGGGTGTGCTTCAG
DN113486_c0_g1	Heme-binding protein 2	Up	158_F	CGAACAGCTTCATGAAGGCG	131
			288_R	GGAGACGGCAAGAGATCCTG
DN113639_c6_g1	NADP-dependent glyceraldehyde-3-phosphate	Up	4_F	GAAACGGTCGACCATGGACA	102
			105_R	TGGCAGCGAAGGAGGTTATT
DN109194_c0_g1	Mn superoxide dismutase, Fe-Mn family	Down	20_F	CTGACCTCCCCTACCCCTAC	176
			195_R	CCCCTTCTTGAAGGCGATGT
DN107706_c0_g1	Thioredoxin	Down	123 F	TGAAGGTCGACGTGGACAAG	123
			245_R	GATCAATGGAGGCCCCCTTC
DN107363_c0_g1	Glutathionyl-hydroquinone reductase YqjG	Down	23_F	CGTCTCTTCCCCACCCTCTA	133
			155_R	CTTTCACTCCAGGGAGCTGG
DN97564_c1_g1	Fe superoxide dismutase 1, Fe-Mn family	Down	48_F	ATGGCTCTGTTTGGGTCTGG	142
			189_R	CATGTTCCCACAAGTCGCAC
DN100508_c0_g1	Fe superoxide dismutase 2, Fe-Mn family	Down	6_F	TTTCGTCAGTGGCATGAGGT	106
			111_R	CGGGGCAGACACAACAAAAG

## Sheet: S2B
Unigene	Expression	logFC	logCPM	PValue	FDR	Swiss-Prot	Pfam	CryptoDB	Function	GO ID	Biological domain
DN113279_c0_g2	Up	-4.86918	3.35557	3.50409e-53	1.98463e-49			Cvel_14295	hypothetical protein
DN113597_c39_g3	Up	-4.87895	4.74087	4.46635e-54	2.891e-50			Cvel_14571	hypothetical protein
DN109205_c1_g1	Up	-7.46583	2.83851	6.47957e-63	7.33973e-59			Cvel_2569	hypothetical protein
DN113597_c39_g2	Up	-4.86522	9.36363	1.45296e-40	2.74306e-37			Cvel_14571	hypothetical protein
DN113263_c3_g2	Up	-4.34908	5.40086	4.92255e-40	8.92162e-37			Cvel_13148	hypothetical protein
DN101140_c2_g1	Up	-6.76503	1.07245	8.23393e-29	6.54525e-26			Cvel_18686	hypothetical protein
DN110619_c0_g1	Up	-7.29472	2.2527	1.53711e-47	4.35289e-44			Cvel_1941	hypothetical protein
DN113279_c0_g1	Up	-5.45936	4.37454	7.04186e-55	5.31778e-51			Cvel_14295	hypothetical protein
DN113597_c44_g1	Up	-4.90801	7.52867	1.5902e-35	2.11918e-32			Cvel_14571	hypothetical protein
DN18688_c0_g1	Up	-4.18887	2.9341	1.69146e-42	3.83199e-39			Cvel_13277	hypothetical protein
DN110624_c1_g2	Up	-4.201	3.19007	1.3914e-41	2.86565e-38			Cvel_1808	hypothetical protein
DN113597_c45_g1	Up	-4.8367	5.39318	1.58043e-35	2.11918e-32			Cvel_14571	hypothetical protein
DN112684_c0_g2	Up	-10.7237	1.62876	8.15648e-37	1.43031e-33			Cvel_29494	hypothetical protein
DN109341_c0_g1	Up	-4.38456	5.39012	6.28603e-34	6.94683e-31			Cvel_19085	hypothetical protein
DN83855_c0_g1	Up	-8.17886	1.13863	1.02835e-33	1.1094e-30			Cvel_2385	hypothetical protein
DN109205_c0_g1	Up	-6.40801	3.52213	2.94446e-50	1.02626e-46			Cvel_2569	hypothetical protein
DN111580_c1_g1	Up	-3.70085	4.42648	8.12792e-38	1.26992e-34			Cvel_1899	hypothetical protein
DN106324_c1_g1	Up	-3.74613	3.12911	1.02824e-34	1.22604e-31			Cvel_14511	hypothetical protein
DN97636_c0_g1	Up	-3.1894	3.45664	2.36313e-29	1.94679e-26			Cvel_15419	hypothetical protein
DN112280_c0_g3	Up	-2.93856	3.25173	4.27751e-25	2.20243e-22			Cvel_24826	hypothetical protein
DN111655_c0_g1	Up	-2.81412	0.976857	5.23563e-11	4.22864e-09			Cvel_12452	hypothetical protein
DN109217_c0_g1	Up	-4.86308	0.180178	3.40566e-17	6.73846e-15			Cvel_6449	hypothetical protein
DN58844_c0_g1	Up	-8.1402	1.87119	1.25872e-41	2.71584e-38			Cvel_11593	hypothetical protein
DN113597_c39_g1	Up	-5.03941	5.57196	8.81693e-28	6.05295e-25			Cvel_14571	hypothetical protein
DN107109_c0_g1	Up	-6.51543	0.318147	3.1252e-21	1.0977e-18			Cvel_27320	hypothetical protein
DN109882_c0_g1	Up	-3.67146	4.85999	1.00145e-32	9.65444e-30			Cvel_26769	hypothetical protein
DN113162_c0_g1	Up	-2.1665	5.10589	8.49828e-11	6.53116e-09			Cvel_4765	hypothetical protein
DN101825_c1_g1	Up	-3.46133	3.21115	2.90053e-25	1.58341e-22			Cvel_7521	hypothetical protein
DN105237_c0_g1	Up	-5.68445	0.0146307	4.26563e-15	6.48576e-13			Cvel_3445	hypothetical protein
DN87486_c0_g1	Up	-4.20379	1.35956	7.30876e-17	1.35721e-14			Cvel_23494	hypothetical protein
DN102642_c1_g1	Up	-2.62861	7.53278	2.63156e-15	4.08342e-13			Cvel_10114	hypothetical protein
DN113597_c47_g1	Up	-4.79135	5.46337	1.6909e-22	6.66216e-20			Cvel_14571	hypothetical protein
DN104160_c1_g2	Up	-4.2297	2.53841	1.13039e-26	7.4229e-24			Cvel_12452	hypothetical protein
DN103490_c0_g1	Up	-3.45904	2.14041	8.24531e-24	3.62714e-21			Cvel_15419	hypothetical protein
DN111516_c26_g1	Up	-2.60337	5.82799	2.40598e-18	5.42364e-16			Cvel_7699	hypothetical protein
DN111242_c1_g1	Up	-2.70165	4.21443	3.94957e-23	1.65699e-20			Cvel_17477	hypothetical protein
DN35400_c0_g1	Up	-3.42971	2.24463	8.30484e-25	3.96097e-22			Cvel_7521	hypothetical protein
DN92653_c1_g1	Up	-3.19213	2.11924	7.78232e-23	3.17673e-20			Cvel_34340	hypothetical protein
DN111494_c22_g1	Up	-2.38877	4.44915	5.41312e-20	1.58238e-17			Cvel_29252	hypothetical protein
DN106324_c0_g1	Up	-3.04628	3.56435	1.97648e-22	7.72019e-20			Cvel_14511	hypothetical protein
DN113355_c0_g1	Up	-4.4369	3.13181	1.73827e-23	7.57319e-21			Cvel_2267	hypothetical protein
DN107192_c5_g1	Up	-2.58671	8.38535	4.26041e-13	4.7664e-11			Cvel_14056	hypothetical protein
DN111516_c24_g1	Up	-3.2472	3.61321	2.43727e-20	9.38978e-18			Cvel_4896	hypothetical protein
DN111516_c25_g1	Up	-2.42956	7.56905	1.88159e-13	2.27347e-11			Cvel_7699	hypothetical protein
DN83040_c1_g1	Up	-2.89424	2.66655	1.13243e-20	3.58814e-18			Cvel_32986	hypothetical protein
DN104599_c0_g1	Up	-2.48232	2.33574	1.17697e-18	2.7348e-16			Cvel_22917	hypothetical protein
DN112762_c0_g1	Up	-2.49689	4.78637	1.41748e-13	1.73584e-11			Cvel_26914	hypothetical protein
DN87505_c2_g1	Up	-2.35229	6.28563	2.40131e-15	3.73894e-13			Cvel_14056	hypothetical protein
DN106123_c0_g1	Up	-2.58374	1.67561	1.81505e-17	3.75525e-15			Cvel_14374	hypothetical protein
DN113389_c2_g2	Up	-4.65902	4.36123	2.66652e-19	8.88708e-17			Cvel_4421	hypothetical protein
DN75878_c0_g1	Up	-9.24226	0.212511	3.78759e-19	1.2347e-16			Cvel_12116	hypothetical protein
DN100409_c0_g1	Up	-2.86606	2.63006	4.89477e-21	1.63075e-18			Cvel_9451	hypothetical protein
DN111516_c25_g2	Up	-2.64064	5.45379	7.56664e-19	2.40496e-16			Cvel_2933	hypothetical protein
DN106684_c0_g1	Up	-9.77938	0.719535	1.36377e-18	4.17889e-16			Cvel_1353	hypothetical protein
DN111516_c6_g1	Up	-2.73318	6.87691	5.22963e-16	8.80872e-14			Cvel_2933	hypothetical protein
DN105357_c0_g1	Up	-2.92262	1.78974	1.49703e-19	4.11094e-17			Cvel_17477	hypothetical protein
DN97496_c0_g1	Up	-2.54552	3.2339	3.35364e-21	1.16887e-18			Cvel_36369	hypothetical protein
DN99387_c0_g1	Up	-9.74095	0.670314	3.88657e-28	2.79525e-25			Cvel_112	hypothetical protein
DN93922_c0_g1	Up	-10.4284	1.32649	5.26552e-33	5.54839e-30			Cvel_1941	hypothetical protein
DN113271_c16_g1	Up	-2.43871	7.27649	9.54733e-14	1.20498e-11			Cvel_9722	hypothetical protein
DN112435_c6_g4	Up	-2.96504	6.34043	4.93872e-17	9.40225e-15			Cvel_134	hypothetical protein
DN113005_c0_g2	Up	-2.29021	5.27874	4.89986e-12	4.68381e-10			Cvel_9977	hypothetical protein
DN51137_c1_g1	Up	-2.77837	7.384	1.17317e-15	1.88497e-13			Cvel_26201	hypothetical protein
DN101920_c1_g1	Up	-4.56789	3.56128	2.1863e-20	6.69332e-18			Cvel_1808	hypothetical protein
DN91059_c0_g1	Up	-3.45814	1.53805	7.35354e-21	2.36304e-18			Cvel_18217	hypothetical protein
DN92263_c0_g1	Up	-10.3262	1.2287	2.51329e-36	3.55866e-33			Cvel_1941	hypothetical protein
DN76051_c0_g1	Up	-9.20043	0.173355	1.88007e-17	4.80447e-15			Cvel_14853	hypothetical protein
DN110473_c2_g1	Up	-2.26434	6.58378	5.292e-13	5.8483e-11			Cvel_20787	hypothetical protein
DN103432_c0_g1	Up	-4.87093	0.657742	2.49337e-21	8.82613e-19			Cvel_17449	hypothetical protein
DN113337_c0_g1	Up	-2.402	2.36889	2.1374e-17	4.38215e-15			Cvel_21679	hypothetical protein
DN113133_c1_g1	Up	-2.86158	5.02333	4.04557e-21	1.36795e-18			Cvel_19468	hypothetical protein
DN112280_c0_g1	Up	-2.66105	3.92057	1.55147e-17	3.23949e-15			Cvel_24826	hypothetical protein
DN74633_c0_g1	Up	-6.35373	0.166852	8.55287e-19	2.03964e-16			Cvel_3693	hypothetical protein
DN113271_c17_g1	Up	-2.58607	8.09769	3.80114e-11	3.13716e-09			Cvel_20787	hypothetical protein
DN109502_c0_g1	Up	-2.38703	4.458	6.44699e-19	1.55379e-16			Cvel_18792	hypothetical protein
DN107078_c0_g1	Up	-2.26096	3.06134	1.95565e-16	4.21408e-14			Cvel_18227	hypothetical protein
DN105719_c0_g1	Up	-2.85957	3.64197	3.30768e-19	8.51539e-17			Cvel_19673	hypothetical protein
DN67344_c1_g1	Up	-2.3064	6.0291	1.02128e-13	1.28183e-11			Cvel_10620	hypothetical protein
DN34959_c0_g1	Up	-6.39537	2.07344	9.49157e-25	4.47982e-22			Cvel_31939	hypothetical protein
DN112435_c6_g1	Up	-3.05143	5.43296	7.15892e-16	1.18383e-13			Cvel_134	hypothetical protein
DN111494_c25_g1	Up	-2.37354	6.44655	2.5279e-13	2.9713e-11			Cvel_29252	hypothetical protein
DN58935_c0_g2	Up	-2.69199	3.24216	2.06853e-19	5.4523e-17			Cvel_23818	hypothetical protein
DN110581_c0_g1	Up	-3.19929	1.83323	1.19667e-10	8.9622e-09			Cvel_25421	hypothetical protein
DN99972_c0_g1	Up	-2.88184	2.15384	1.38989e-08	7.222e-07			Cvel_8106	hypothetical protein
DN123771_c0_g1	Up	-2.88791	1.58203	6.96559e-17	1.29881e-14			Cvel_12054	hypothetical protein
DN112435_c2_g1	Up	-3.17432	3.6279	4.7142e-17	9.08937e-15			Cvel_134	hypothetical protein
DN107697_c0_g2	Up	-2.22794	3.70353	5.08759e-17	9.60494e-15			Cvel_5468	hypothetical protein
DN69332_c0_g1	Up	-2.73044	9.71303	3.79019e-12	3.70116e-10			Cvel_34933	hypothetical protein
DN65528_c0_g1	Up	-3.14546	1.60009	1.53834e-19	4.14894e-17			Cvel_6241	hypothetical protein
DN94023_c0_g1	Up	-2.54797	1.51692	3.44144e-15	5.26796e-13			Cvel_32986	hypothetical protein
DN108389_c0_g1	Up	-2.90719	2.70705	2.00978e-21	7.22725e-19			Cvel_29304	hypothetical protein
DN111501_c0_g1	Up	-13.3671	4.23828	5.38576e-14	8.35023e-12			Cvel_23063	hypothetical protein
DN105662_c1_g2	Up	-3.61679	1.03347	1.74466e-16	3.08791e-14			Cvel_134	hypothetical protein
DN109556_c0_g1	Up	-2.19105	1.67197	4.81661e-12	4.61396e-10			Cvel_5592	hypothetical protein
DN92214_c1_g1	Up	-2.78985	6.77984	2.2406e-13	2.65763e-11			Cvel_20787	hypothetical protein
DN111997_c2_g1	Up	-2.24914	5.07163	1.95099e-10	1.40316e-08			Cvel_16732	hypothetical protein
DN112280_c0_g2	Up	-2.29224	2.86512	7.57977e-15	1.12859e-12			Cvel_23818	hypothetical protein
DN112017_c0_g1	Up	-2.16789	5.50379	2.47018e-12	2.47072e-10			Cvel_2432	hypothetical protein
DN8641_c0_g1	Up	-9.49707	0.440938	2.24605e-21	8.01328e-19			Cvel_25934	hypothetical protein
DN86251_c0_g1	Up	-8.00273	1.01108	7.80499e-15	1.1557e-12			Cvel_3445	hypothetical protein
DN113043_c19_g2	Up	-2.34954	7.28251	1.7958e-13	2.18144e-11			Cvel_10620	hypothetical protein
DN99166_c0_g1	Up	-4.1917	1.6245	2.73143e-17	5.45204e-15			Cvel_23620	hypothetical protein
DN76399_c0_g1	Up	-6.1757	0.47786	3.90707e-21	1.33105e-18			Cvel_24749	hypothetical protein
DN112435_c6_g2	Up	-2.80056	7.7876	2.39768e-12	2.40884e-10			Cvel_134	hypothetical protein
DN85217_c0_g1	Up	-2.66263	1.34359	2.10359e-16	3.68006e-14			Cvel_14095	hypothetical protein
DN113355_c0_g2	Up	-4.40347	5.08242	2.25272e-14	3.12143e-12			Cvel_2267	hypothetical protein
DN111573_c3_g1	Up	-2.44083	5.61596	2.68383e-12	2.67262e-10			Cvel_9722	hypothetical protein
DN83236_c3_g1	Up	-2.62387	4.01415	7.87829e-15	1.16275e-12			Cvel_23642	hypothetical protein
DN111494_c23_g2	Up	-2.56095	9.39169	5.61817e-10	3.77125e-08			Cvel_26201	hypothetical protein
DN96486_c0_g1	Up	-2.72118	0.943945	2.85648e-14	3.86349e-12			Cvel_9114	hypothetical protein
DN87505_c7_g1	Up	-2.46913	8.58969	7.10828e-10	4.68134e-08			Cvel_25754	hypothetical protein
DN100273_c0_g1	Up	-3.15973	0.962187	8.7611e-14	1.10884e-11			Cvel_1262	hypothetical protein
DN5979_c0_g1	Up	-4.78373	1.45833	9.34647e-18	2.01661e-15			Cvel_26626	hypothetical protein
DN58935_c0_g1	Up	-3.43973	2.76796	6.15923e-19	1.49238e-16			Cvel_23818	hypothetical protein
DN117716_c0_g1	Up	-2.81288	0.317434	1.65374e-11	1.44098e-09			Cvel_14765	hypothetical protein
DN82613_c5_g1	Up	-2.47877	8.20771	1.48269e-11	1.30702e-09			Cvel_26201	hypothetical protein
DN97501_c0_g1	Up	-8.82965	-0.168035	2.46079e-12	2.9445e-10			Cvel_3365	hypothetical protein
DN58598_c0_g1	Up	-2.15992	3.07584	2.9662e-12	3.49174e-10			Cvel_8126	hypothetical protein
DN94991_c1_g1	Up	-2.27675	6.15688	2.46724e-11	2.09346e-09			Cvel_10844	hypothetical protein
DN106048_c0_g1	Up	-5.49059	0.675369	4.93039e-17	9.40225e-15			Cvel_23620	hypothetical protein
DN101259_c1_g1	Up	-2.9791	2.02822	6.28233e-18	1.37513e-15			Cvel_25295	hypothetical protein
DN101259_c16_g4	Up	-2.62365	8.92141	6.52959e-09	3.64355e-07			Cvel_28904	hypothetical protein
DN87793_c1_g1	Up	-3.38937	1.96379	1.97889e-16	3.48885e-14			Cvel_5315	hypothetical protein
DN102534_c1_g1	Up	-2.26531	2.20715	1.33647e-13	1.65001e-11			Cvel_1808	hypothetical protein
DN97911_c0_g1	Up	-2.56473	0.474523	1.27224e-09	8.00629e-08			Cvel_5592	hypothetical protein
DN22608_c0_g1	Up	-4.38428	1.92922	2.1551e-16	3.75568e-14			Cvel_25125	hypothetical protein
DN104197_c0_g1	Up	-2.67407	0.635506	6.73697e-13	7.32019e-11			Cvel_4446	hypothetical protein
DN123578_c1_g1	Up	-2.61875	8.3653	2.77699e-11	2.34749e-09			Cvel_34933	hypothetical protein
DN91552_c4_g1	Up	-2.76525	6.40374	9.63477e-12	1.02503e-09			Cvel_10844	hypothetical protein
DN102926_c0_g1	Up	-2.26544	1.29517	5.97931e-11	4.76977e-09			Cvel_722	hypothetical protein
DN108408_c0_g1	Up	-2.72004	3.81643	1.32853e-12	1.40316e-10			Cvel_28819	hypothetical protein
DN98763_c0_g1	Up	-8.35122	-0.61161	2.26154e-14	3.1241e-12			Cvel_1941	hypothetical protein
DN110624_c0_g1	Up	-5.37809	0.390717	3.17245e-20	9.51944e-18			Cvel_1808	hypothetical protein
DN113699_c4_g1	Up	-2.48095	6.66135	8.81258e-11	6.75432e-09			Cvel_34933	hypothetical protein
DN92653_c0_g1	Up	-3.83377	2.37773	6.32456e-14	8.23465e-12			Cvel_34340	hypothetical protein
DN120904_c0_g1	Up	-2.57215	0.754198	1.38998e-10	1.02573e-08			Cvel_18792	hypothetical protein
DN112650_c0_g2	Up	-8.7127	-0.276431	1.75146e-11	1.74645e-09			Cvel_11628	hypothetical protein
DN113271_c17_g3	Up	-2.54803	8.01901	9.27794e-11	7.06527e-09			Cvel_28905	hypothetical protein
DN93396_c0_g1	Up	-2.62238	0.549945	1.73856e-05	0.000392302			Cvel_10551	hypothetical protein
DN108494_c10_g2	Up	-2.34286	4.20746	9.39291e-13	1.00851e-10			Cvel_10844	hypothetical protein
DN111476_c0_g1	Up	-2.53256	3.00445	3.15152e-12	3.11101e-10			Cvel_6241	hypothetical protein
DN34642_c0_g1	Up	-6.34614	0.217934	2.38094e-19	6.20001e-17			Cvel_14511	hypothetical protein
DN108352_c0_g1	Up	-2.24545	2.58048	9.3176e-13	1.0028e-10			Cvel_17477	hypothetical protein
DN29369_c0_g1	Up	-2.70962	3.62899	3.49981e-13	3.97435e-11			Cvel_2642	hypothetical protein
DN113337_c1_g3	Up	-2.45809	3.06976	1.05022e-12	1.12495e-10			Cvel_15518	hypothetical protein
DN17535_c0_g1	Up	-2.84168	1.4883	7.03708e-14	9.08405e-12			Cvel_2494	hypothetical protein
DN64394_c2_g1	Up	-2.62884	7.1245	2.66509e-10	1.878e-08			Cvel_4896	hypothetical protein
DN78796_c0_g1	Up	-2.48632	7.39625	2.46551e-10	1.75373e-08			Cvel_28904	hypothetical protein
DN99717_c0_g1	Up	-2.28854	1.57452	1.07741e-11	9.86213e-10			Cvel_19000	hypothetical protein
DN108595_c0_g1	Up	-2.13722	3.0346	2.92704e-11	2.46504e-09			Cvel_12114	hypothetical protein
DN104669_c0_g1	Up	-9.68329	0.616693	1.68875e-22	6.66216e-20			Cvel_3445	hypothetical protein
DN98128_c0_g1	Up	-9.13315	0.0999311	1.54546e-18	3.5366e-16			Cvel_113	hypothetical protein
DN120770_c0_g1	Up	-8.62636	-0.361447	3.30941e-13	3.7866e-11			Cvel_112	hypothetical protein
DN88943_c0_g1	Up	-2.72027	0.206753	1.84986e-09	1.12751e-07			Cvel_1902	hypothetical protein
DN60822_c0_g1	Up	-2.12015	1.9587	1.18931e-10	1.02511e-08			Cvel_1432	hypothetical protein
DN109418_c0_g1	Up	-2.03107	2.33178	8.73257e-12	8.07495e-10			Cvel_9647	hypothetical protein
DN51279_c0_g1	Up	-3.15035	0.538743	5.92846e-13	6.51987e-11			Cvel_12115	hypothetical protein
DN112435_c1_g1	Up	-2.92297	4.83803	3.02628e-11	2.53458e-09			Cvel_134	hypothetical protein
DN113699_c12_g1	Up	-2.46135	9.76419	2.91673e-10	2.04261e-08			Cvel_34933	hypothetical protein
DN108050_c0_g1	Up	-4.56457	0.252629	8.16507e-16	1.33559e-13			Cvel_26626	hypothetical protein
DN108976_c0_g1	Up	-2.10953	1.90091	7.42337e-11	5.77926e-09			Cvel_21994	hypothetical protein
DN88116_c0_g1	Up	-3.89902	2.7897	1.89891e-12	1.95101e-10			Cvel_20045	hypothetical protein
DN93133_c0_g1	Up	-6.08207	-0.811885	1.12013e-10	8.43072e-09			Cvel_1941	hypothetical protein
DN93738_c0_g1	Up	-7.93978	8.22118	4.45205e-12	4.30111e-10			Cvel_7115	hypothetical protein
DN113271_c2_g1	Up	-2.55064	4.02661	2.31678e-11	1.97014e-09			Cvel_36650	hypothetical protein
DN91665_c1_g1	Up	-3.22889	1.08215	3.76335e-15	5.74133e-13			Cvel_19000	hypothetical protein
DN82419_c0_g1	Up	-3.18333	0.226176	1.83357e-09	1.12269e-07			Cvel_14021	hypothetical protein
DN113005_c0_g1	Up	-2.21671	3.53921	4.75414e-13	5.29263e-11			Cvel_9977	hypothetical protein
DN111494_c26_g1	Up	-2.42171	7.10715	1.32912e-09	8.31802e-08			Cvel_25754	hypothetical protein
DN16406_c0_g1	Up	-4.17145	0.593074	1.00916e-18	2.36918e-16			Cvel_9451	hypothetical protein
DN128422_c0_g1	Up	-3.67293	0.575269	2.87867e-14	3.88192e-12			Cvel_15161	hypothetical protein
DN30967_c0_g1	Up	-2.94514	0.567324	3.9924e-11	3.28305e-09			Cvel_16327	hypothetical protein
DN108212_c0_g1	Up	-2.67114	1.87352	4.9188e-13	5.46252e-11			Cvel_20140	hypothetical protein
DN96658_c9_g1	Up	-2.40561	8.4599	1.89507e-09	1.14947e-07			Cvel_29252	hypothetical protein
DN106222_c7_g1	Up	-2.63325	8.12974	6.09996e-08	2.69911e-06			Cvel_29253	hypothetical protein
DN74474_c0_g1	Up	-2.38074	2.44422	8.84782e-12	8.16486e-10			Cvel_14788	hypothetical protein
DN113601_c1_g3	Up	-2.18785	5.65039	1.75369e-09	1.07961e-07			Cvel_16232	hypothetical protein
DN113664_c12_g1	Up	-8.08523	-0.837886	1.78664e-09	1.21957e-07			Cvel_25169	hypothetical protein
DN110958_c0_g1	Up	-2.06974	3.62849	1.84761e-09	1.2595e-07			Cvel_4421	hypothetical protein
DN113601_c1_g2	Up	-2.26888	2.15958	4.8495e-10	3.28447e-08			Cvel_16232	hypothetical protein
DN86334_c3_g1	Up	-2.88641	8.72483	1.77492e-09	1.08972e-07			Cvel_28904	hypothetical protein
DN102527_c0_g1	Up	-2.77079	2.59156	9.0241e-10	5.80798e-08			Cvel_16732	hypothetical protein
DN111476_c0_g2	Up	-2.75907	4.11418	2.06973e-19	5.4523e-17			Cvel_6241	hypothetical protein
DN112703_c0_g1	Up	-2.45006	1.7283	5.1873e-11	4.20459e-09			Cvel_15491	hypothetical protein
DN77729_c1_g1	Up	-2.48212	6.36951	3.04339e-09	1.79086e-07			Cvel_28904	hypothetical protein
DN95315_c0_g1	Up	-3.80052	2.96832	3.98387e-08	1.82332e-06			Cvel_14397	hypothetical protein
DN111002_c0_g1	Up	-7.25984	7.10432	3.13492e-10	2.18528e-08			Cvel_24504	hypothetical protein
DN27515_c0_g1	Up	-8.11591	-0.8101	4.27719e-09	2.71212e-07			Cvel_15310	hypothetical protein
DN58687_c0_g1	Up	-2.3769	1.89297	6.81053e-12	6.37573e-10			Cvel_4446	hypothetical protein
DN112007_c1_g1	Up	-8.15555	-0.774434	4.8612e-09	3.04303e-07			Cvel_26059	hypothetical protein
DN127810_c1_g1	Up	-2.40581	7.65462	8.24819e-09	4.4973e-07			Cvel_10844	hypothetical protein
DN54055_c2_g1	Up	-2.68811	5.28044	1.88407e-09	1.14433e-07			Cvel_20787	hypothetical protein
DN1598_c0_g1	Up	-3.46769	0.874896	1.62883e-11	1.42201e-09			Cvel_12115	hypothetical protein
DN99314_c1_g1	Up	-2.33606	3.98772	4.15041e-10	2.85798e-08			Cvel_23642	hypothetical protein
DN94755_c0_g1	Up	-2.01998	1.55979	2.70516e-09	1.60854e-07			Cvel_20551	hypothetical protein
DN112331_c1_g1	Up	-2.97063	1.81217	6.65774e-09	4.04507e-07			Cvel_21773	hypothetical protein
DN122298_c0_g1	Up	-3.7359	-0.202079	8.82489e-11	6.75432e-09			Cvel_29852	hypothetical protein
DN106222_c5_g1	Up	-2.53991	5.30126	3.52004e-09	2.05797e-07			Cvel_20344	hypothetical protein
DN109128_c0_g1	Up	-2.4712	0.16581	3.76944e-08	1.74136e-06			Cvel_8229	hypothetical protein
DN84956_c0_g1	Up	-5.1298	-0.483383	6.66008e-12	6.26075e-10			Cvel_10396	hypothetical protein
DN116826_c0_g1	Up	-2.15537	2.61222	4.93421e-11	4.01381e-09			Cvel_19043	hypothetical protein
DN8336_c0_g1	Up	-3.06001	0.571602	6.87434e-12	6.42219e-10			Cvel_4213	hypothetical protein
DN94107_c2_g1	Up	-2.07901	1.30732	3.27455e-10	2.27213e-08			Cvel_5592	hypothetical protein
DN111379_c4_g2	Up	-3.08546	0.993932	1.42869e-08	8.19073e-07			Cvel_23512	hypothetical protein
DN102534_c2_g1	Up	-2.53496	2.23731	1.14927e-10	8.63571e-09			Cvel_5592	hypothetical protein
DN26662_c0_g1	Up	-2.78484	0.871658	3.60536e-13	4.07379e-11			Cvel_867	hypothetical protein
DN131141_c1_g1	Up	-2.4128	7.83728	1.72971e-08	8.83576e-07			Cvel_25753	hypothetical protein
DN81297_c0_g1	Up	-2.16968	1.72376	5.09224e-10	3.44372e-08			Cvel_6944	hypothetical protein
DN13603_c0_g1	Up	-2.68725	0.913983	1.1948e-12	1.27081e-10			Cvel_9011	hypothetical protein
DN4052_c0_g1	Up	-3.52496	-0.0160505	1.52791e-09	9.45762e-08			Cvel_9451	hypothetical protein
DN91225_c3_g1	Up	-2.36641	6.27516	2.40705e-08	1.17906e-06			Cvel_4896	hypothetical protein
DN111494_c8_g1	Up	-2.27238	5.80631	2.92641e-08	1.39379e-06			Cvel_29252	hypothetical protein
DN80911_c2_g1	Up	-2.59909	7.3261	2.15778e-08	1.07438e-06			Cvel_20787	hypothetical protein
DN67128_c0_g1	Up	-3.07747	4.60313	3.15853e-09	1.8538e-07			Cvel_28904	hypothetical protein
DN110494_c0_g1	Up	-8.31622	-0.631471	2.67687e-08	1.45593e-06			Cvel_20076	hypothetical protein
DN65379_c0_g1	Up	-3.24849	0.638651	1.93775e-10	1.39586e-08			Cvel_15312	hypothetical protein
DN102968_c0_g1	Up	-2.40571	7.57545	6.92526e-08	3.02943e-06			Cvel_28904	hypothetical protein
DN113597_c37_g2	Up	-2.27701	7.54161	3.87677e-08	2.03877e-06			Cvel_25753	hypothetical protein
DN131623_c1_g1	Up	-2.4005	7.24541	4.17495e-08	1.90885e-06			Cvel_25753	hypothetical protein
DN113475_c0_g1	Up	-2.03504	3.21553	4.10826e-08	2.14498e-06			Cvel_2905	hypothetical protein
DN90846_c0_g1	Up	-2.25045	0.935057	4.15164e-08	2.16319e-06			Cvel_118	hypothetical protein
DN110529_c18_g2	Up	-2.64848	7.8878	4.95306e-08	2.54427e-06			Cvel_4896	hypothetical protein
DN105256_c0_g1	Up	-2.12384	1.11748	4.09754e-09	2.36208e-07			Cvel_36020	hypothetical protein
DN123591_c0_g1	Up	-2.31201	0.97338	5.02456e-08	2.57364e-06			Cvel_5212	hypothetical protein
DN110581_c1_g1	Up	-2.89987	2.24249	1.34226e-10	9.93755e-09			Cvel_25421	hypothetical protein
DN60144_c0_g1	Up	-2.55781	0.0969043	3.55888e-08	1.66069e-06			Cvel_1262	hypothetical protein
DN80818_c7_g1	Up	-2.35017	6.91037	6.37021e-08	2.79956e-06			Cvel_14056	hypothetical protein
DN91225_c0_g1	Up	-2.34079	7.2875	6.61575e-08	2.90183e-06			Cvel_25294	hypothetical protein
DN109504_c0_g1	Up	-2.35261	1.98193	4.31573e-10	2.95386e-08			Cvel_18054	hypothetical protein
DN103501_c8_g3	Up	-2.80713	4.6275	1.0534e-08	5.57587e-07			Cvel_14056	hypothetical protein
DN126381_c0_g1	Up	-2.75347	0.691457	4.58908e-10	3.12679e-08			Cvel_17477	hypothetical protein
DN96725_c0_g1	Up	-2.765	2.10422	8.43226e-08	4.12769e-06			Cvel_13563	hypothetical protein
DN100567_c0_g1	Up	-2.65252	2.30708	1.02772e-09	6.56786e-08			Cvel_3452	hypothetical protein
DN83118_c0_g1	Up	-8.34623	-0.603261	9.82518e-08	4.74051e-06			Cvel_6996	hypothetical protein
DN111833_c3_g1	Up	-2.72648	4.05282	8.58857e-09	4.6589e-07			Cvel_36578	hypothetical protein
DN87286_c0_g1	Up	-2.14991	0.903885	2.78703e-08	1.33771e-06			Cvel_19673	hypothetical protein
DN108080_c0_g1	Up	-7.89376	-1.00098	1.06485e-07	5.10867e-06			Cvel_7328	hypothetical protein
DN105874_c0_g1	Up	-2.24297	0.204024	1.61844e-07	6.51257e-06			Cvel_23008	hypothetical protein
DN14857_c0_g1	Up	-5.65017	5.79038	1.50333e-08	7.76692e-07			Cvel_5959	hypothetical protein
DN115957_c0_g1	Up	-2.12646	1.29787	8.79629e-10	5.67749e-08			Cvel_13088	hypothetical protein
DN87933_c0_g1	Up	-3.99561	-0.225561	1.32034e-07	6.24603e-06			Cvel_21517	hypothetical protein
DN84066_c0_g1	Up	-3.72903	0.0891402	2.42867e-12	2.43458e-10			Cvel_12438	hypothetical protein
DN99506_c3_g1	Up	-2.03062	6.81418	3.02843e-07	1.14635e-05			Cvel_14056	hypothetical protein
DN106476_c1_g1	Up	-4.14163	3.4912	2.05312e-08	1.02906e-06			Cvel_25191	hypothetical protein
DN61901_c0_g1	Up	-4.50181	-0.400555	2.0001e-07	9.0492e-06			Cvel_14703	hypothetical protein
DN85470_c0_g1	Up	-2.2416	0.700211	2.35266e-07	1.05041e-05			Cvel_30442	hypothetical protein
DN109747_c6_g1	Up	-2.31031	7.47266	2.20403e-07	8.6016e-06			Cvel_2932	hypothetical protein
DN95813_c0_g1	Up	-2.63377	1.78259	2.31479e-09	1.39103e-07			Cvel_14095	hypothetical protein
DN124815_c0_g1	Up	-2.00304	1.06724	3.22089e-07	1.38927e-05			Cvel_19975	hypothetical protein
DN59403_c0_g1	Up	-3.03073	0.075756	3.23367e-07	1.3936e-05			Cvel_4213	hypothetical protein
DN48921_c0_g1	Up	-6.25094	0.17497	5.5851e-11	4.49486e-09			Cvel_21113	hypothetical protein
DN94027_c0_g2	Up	-2.51983	6.84881	2.5326e-07	9.74953e-06			Cvel_4344	hypothetical protein
DN105963_c0_g1	Up	-3.50763	1.05565	6.14911e-10	4.08528e-08			Cvel_18217	hypothetical protein
DN81867_c0_g1	Up	-2.27497	-0.368081	4.06794e-06	0.00011427			Cvel_17420	hypothetical protein
DN101920_c0_g1	Up	-2.09323	0.526974	4.66452e-08	2.11773e-06			Cvel_1808	hypothetical protein
DN79675_c0_g1	Up	-2.75325	0.706255	2.15333e-08	1.07335e-06			Cvel_14063	hypothetical protein
DN7964_c0_g1	Up	-2.23341	0.323846	1.42543e-07	5.83436e-06			Cvel_24741	hypothetical protein
DN28114_c0_g1	Up	-3.46207	0.163594	1.40433e-08	7.2887e-07			Cvel_10254	hypothetical protein
DN113601_c1_g1	Up	-2.27261	3.80618	2.93004e-08	1.39379e-06			Cvel_16232	hypothetical protein
DN84339_c1_g1	Up	-5.84365	0.116271	5.25005e-07	2.13077e-05			Cvel_22547	hypothetical protein
DN18408_c0_g1	Up	-2.67141	2.2865	3.44813e-08	1.61067e-06			Cvel_16732	hypothetical protein
DN110673_c0_g1	Up	-8.35331	-0.59904	5.81196e-07	2.33276e-05			Cvel_1920	hypothetical protein
DN109533_c11_g11	Up	-2.70493	1.01176	6.1467e-07	2.45936e-05			Cvel_27583	hypothetical protein
DN85226_c0_g1	Up	-3.12387	0.232288	8.89721e-08	3.82116e-06			Cvel_14765	hypothetical protein
DN133816_c0_g1	Up	-2.08263	1.53963	3.5715e-11	2.9584e-09			Cvel_18066	hypothetical protein
DN100827_c0_g1	Up	-2.23553	0.817052	3.58408e-08	1.66901e-06			Cvel_26745	hypothetical protein
DN14037_c0_g1	Up	-2.16451	1.8237	2.87673e-09	1.69719e-07			Cvel_23240	hypothetical protein
DN98427_c13_g1	Up	-2.89793	2.15693	8.28799e-09	4.51357e-07			Cvel_30525	hypothetical protein
DN100673_c0_g1	Up	-8.58291	-0.393411	9.20762e-07	3.54999e-05			Cvel_22861	hypothetical protein
DN20424_c0_g1	Up	-2.51739	1.27896	1.01626e-08	5.40454e-07			Cvel_12054	hypothetical protein
DN112210_c2_g1	Up	-4.84124	0.366297	9.96964e-07	3.82062e-05			Cvel_11641	hypothetical protein
DN111833_c4_g1	Up	-2.54572	6.2905	4.73842e-06	0.000129492			Cvel_14056	hypothetical protein
DN36861_c0_g1	Up	-3.93373	-0.109463	3.95333e-10	2.72641e-08			Cvel_13944	hypothetical protein
DN88191_c0_g1	Up	-2.22839	0.935465	5.5792e-07	1.95964e-05			Cvel_17548	hypothetical protein
DN103831_c0_g1	Up	-2.22279	5.29994	2.93463e-08	1.39379e-06			Cvel_15518	hypothetical protein
DN111837_c0_g1	Up	-2.03263	1.74869	1.40265e-06	5.13538e-05			Cvel_24671	hypothetical protein
DN92131_c0_g1	Up	-2.36644	1.06181	6.7671e-07	2.33169e-05			Cvel_28955	hypothetical protein
DN63795_c0_g1	Up	-4.07514	0.253595	6.06288e-09	3.4083e-07			Cvel_12239	hypothetical protein
DN99419_c0_g1	Up	-2.09296	2.50046	6.30874e-08	2.77523e-06			Cvel_10530	hypothetical protein
DN74886_c0_g1	Up	-4.2602	-0.858697	9.78632e-08	4.15185e-06			Cvel_31089	hypothetical protein
DN52834_c0_g1	Up	-5.07727	0.813068	2.44205e-08	1.19234e-06			Cvel_23620	hypothetical protein
DN110706_c0_g1	Up	-2.15159	1.86864	1.72064e-06	6.12328e-05			Cvel_23103	hypothetical protein
DN39932_c0_g1	Up	-2.22114	0.629084	2.83459e-09	1.6767e-07			Cvel_14113	hypothetical protein
DN108494_c10_g1	Up	-2.42468	8.70734	1.29229e-07	5.33764e-06			Cvel_3263	hypothetical protein
DN102061_c0_g1	Up	-2.1895	1.70409	1.86292e-08	9.43727e-07			Cvel_23642	hypothetical protein
DN101626_c0_g1	Up	-2.13771	2.07077	4.80059e-09	2.7464e-07			Cvel_10254	hypothetical protein
DN109762_c1_g1	Up	-3.16196	1.62956	2.98979e-08	1.41702e-06			Cvel_1811	hypothetical protein
DN109762_c1_g1	Up	-3.18028	2.40587	3.06168e-06	0.000102771			Cvel_25125	hypothetical protein
DN109932_c0_g2	Up	-2.30564	4.33175	7.81905e-07	2.66177e-05			Cvel_8891	hypothetical protein
DN98672_c0_g1	Up	-4.38581	-0.580585	3.19318e-06	0.000106692			Cvel_19704	hypothetical protein
DN108494_c1_g1	Up	-2.25776	5.6996	8.72428e-08	3.76115e-06			Cvel_7699	hypothetical protein
DN113699_c3_g1	Up	-2.78309	0.687712	1.29202e-11	1.15466e-09			Cvel_34933	hypothetical protein
DN111718_c0_g1	Up	-8.04951	-0.865136	3.48994e-06	0.000114946			Cvel_24253	hypothetical protein
DN118731_c0_g1	Up	-4.56405	-0.275714	9.75858e-10	6.2533e-08			Cvel_4569	hypothetical protein
DN7617_c0_g1	Up	-2.32223	0.868519	3.83725e-08	1.76873e-06			Cvel_9715	hypothetical protein
DN89067_c0_g1	Up	-2.13366	3.18843	5.04962e-06	0.000160496			Cvel_14331	hypothetical protein
DN108494_c11_g1	Up	-2.53047	6.33001	2.72948e-06	8.03742e-05			Cvel_23642	hypothetical protein
DN29286_c0_g1	Up	-3.39645	1.19361	6.53723e-06	0.000201992			Cvel_18533	hypothetical protein
DN107192_c0_g1	Up	-2.06273	1.63291	1.05114e-08	5.57045e-07			Cvel_25754	hypothetical protein
DN89702_c0_g1	Up	-2.28748	0.238689	8.18201e-07	2.77075e-05			Cvel_29304	hypothetical protein
DN102268_c0_g1	Up	-2.29304	2.29837	7.92869e-07	2.69504e-05			Cvel_5573	hypothetical protein
DN110529_c19_g1	Up	-2.51036	6.73151	4.26555e-06	0.00011879			Cvel_20787	hypothetical protein
DN70238_c0_g1	Up	-2.96361	-0.0850525	1.38227e-08	7.19063e-07			Cvel_14095	hypothetical protein
DN32856_c1_g1	Up	-2.06894	5.05965	4.80127e-06	0.000130737			Cvel_20787	hypothetical protein
DN75300_c0_g1	Up	-2.91654	0.576817	1.0346e-06	3.42674e-05			Cvel_23722	hypothetical protein
DN54746_c0_g1	Up	-2.33193	1.43707	1.35519e-06	4.36416e-05			Cvel_10254	hypothetical protein
DN88736_c0_g1	Up	-2.47933	3.49754	4.20703e-09	2.41598e-07			Cvel_9868	hypothetical protein
DN6299_c0_g1	Up	-3.38417	0.186266	4.31326e-08	1.96613e-06			Cvel_24109	hypothetical protein
DN95606_c0_g1	Up	-3.52162	-0.233394	7.04192e-07	2.41536e-05			Cvel_18872	hypothetical protein
DN18440_c0_g1	Up	-3.20847	1.79515	6.61669e-07	2.28508e-05			Cvel_12926	hypothetical protein
DN102511_c2_g1	Up	-2.23889	1.67463	4.99297e-05	0.000960235			Cvel_15354	hypothetical protein
DN87096_c0_g1	Up	-2.13002	2.22641	4.97501e-07	1.77494e-05			Cvel_17548	hypothetical protein
DN108565_c0_g1	Up	-2.22533	1.42813	1.66641e-08	8.54131e-07			Cvel_26857	hypothetical protein
DN28923_c0_g1	Up	-2.7974	-0.220606	2.92518e-08	1.39379e-06			Cvel_14765	hypothetical protein
DN94604_c0_g1	Up	-2.21242	0.552683	1.75172e-07	6.99301e-06			Cvel_13088	hypothetical protein
DN134096_c0_g1	Up	-2.59383	0.109347	4.37361e-07	1.58155e-05			Cvel_2105	hypothetical protein
DN108340_c0_g1	Up	-4.42012	0.467381	2.02445e-05	0.000526606			Cvel_8706	hypothetical protein
DN95562_c0_g1	Up	-2.37482	1.40114	4.08584e-06	0.000114702			Cvel_21271	hypothetical protein
DN9448_c0_g1	Up	-2.69963	0.551546	2.04045e-06	6.22998e-05			Cvel_14774	hypothetical protein
DN27398_c0_g1	Up	-3.52039	1.17453	1.19999e-06	3.90038e-05			Cvel_7088	hypothetical protein
DN35328_c0_g1	Up	-2.39148	0.912122	2.10206e-07	8.22491e-06			Cvel_20140	hypothetical protein
DN105352_c0_g1	Up	-2.04312	0.0477599	1.67921e-05	0.000381762			Cvel_10530	hypothetical protein
DN19918_c0_g1	Up	-2.91198	-0.203735	2.65971e-05	0.000657865			Cvel_16732	hypothetical protein
DN106564_c0_g1	Up	-6.19987	3.01078	3.02595e-05	0.000730681			Cvel_5644	hypothetical protein
DN197_c0_g1	Up	-3.29477	1.25323	1.19879e-10	8.96322e-09			Cvel_2494	hypothetical protein
DN111833_c5_g1	Up	-2.40657	7.60434	1.55072e-05	0.000356123			Cvel_10844	hypothetical protein
DN83140_c0_g1	Up	-2.27385	1.54081	3.33853e-05	0.000796705			Cvel_18690	hypothetical protein
DN87000_c1_g1	Up	-2.16814	-0.0169052	4.58568e-05	0.000892131			Cvel_10599	hypothetical protein
DN59261_c0_g1	Up	-2.91356	1.84371	1.67482e-06	5.2772e-05			Cvel_22917	hypothetical protein
DN111164_c0_g1	Up	-2.20022	1.46999	1.12808e-07	4.71962e-06			Cvel_16418	hypothetical protein
DN13737_c0_g1	Up	-3.51684	-0.490159	4.31461e-05	0.000991931			Cvel_11399	hypothetical protein
DN108010_c1_g2	Up	-8.65168	4.02813	2.3101e-77	1.04671e-72				hypothetical protein
DN112561_c2_g1	Up	-8.4002	3.77111	4.09267e-75	9.27195e-71				hypothetical protein
DN112720_c3_g1	Up	-11.1721	2.04874	7.75811e-52	3.90578e-48				hypothetical protein
DN65217_c0_g1	Up	-9.52177	2.45206	1.16289e-51	5.26907e-48				hypothetical protein
DN108827_c0_g1	Up	-5.6108	2.87388	3.90123e-51	1.60695e-47				hypothetical protein
DN2755_c0_g1	Up	-4.63474	3.65048	3.41649e-48	1.03201e-44				hypothetical protein
DN109906_c0_g2	Up	-5.09732	4.18085	1.04022e-42	2.48065e-39				hypothetical protein
DN108010_c1_g1	Up	-7.18186	6.19228	2.30219e-29	1.93171e-26				hypothetical protein
DN105995_c0_g1	Up	-5.81293	3.89156	7.13044e-50	2.30772e-46				hypothetical protein
DN109906_c0_g1	Up	-4.70144	3.94389	7.85881e-38	1.26992e-34				hypothetical protein
DN27435_c0_g1	Up	-7.65245	2.55067	5.21983e-51	1.97092e-47				hypothetical protein
DN109349_c1_g1	Up	-3.8986	2.42693	9.12789e-31	8.1095e-28				hypothetical protein
DN9782_c0_g1	Up	-6.02714	1.77753	9.84223e-43	2.47751e-39				hypothetical protein
DN108545_c2_g1	Up	-9.012	4.36753	2.56135e-34	2.97576e-31				hypothetical protein
DN111123_c0_g1	Up	-4.30259	2.94375	3.89015e-37	5.68589e-34				hypothetical protein
DN110725_c2_g1	Up	-3.73304	7.62116	5.24013e-25	2.66775e-22				hypothetical protein
DN112540_c8_g2	Up	-4.02672	8.62527	1.83399e-26	1.15414e-23				hypothetical protein
DN113263_c3_g1	Up	-4.01377	7.4983	1.25307e-26	8.11093e-24				hypothetical protein
DN112156_c0_g1	Up	-4.07455	3.64453	3.86736e-34	4.38075e-31				hypothetical protein
DN112540_c8_g1	Up	-3.52993	5.40339	2.12545e-26	1.31923e-23				hypothetical protein
DN113605_c2_g2	Up	-2.26838	6.57407	7.73397e-13	8.3634e-11				hypothetical protein
DN108338_c0_g1	Up	-5.33697	1.5385	5.49236e-24	2.46395e-21				hypothetical protein
DN116814_c0_g1	Up	-6.20583	2.26096	3.29345e-37	4.97421e-34				hypothetical protein
DN106935_c0_g1	Up	-4.64177	1.31041	6.7271e-28	4.76257e-25				hypothetical protein
DN112540_c9_g1	Up	-4.05516	6.45224	6.28375e-25	3.09475e-22				hypothetical protein
DN27407_c0_g1	Up	-3.89635	2.25318	9.20902e-29	7.07221e-26				hypothetical protein
DN25237_c0_g1	Up	-7.72907	0.723083	2.20688e-28	1.6128e-25				hypothetical protein
DN110624_c1_g1	Up	-4.11012	1.78584	1.57977e-26	1.00816e-23				hypothetical protein
DN109567_c1_g1	Up	-3.82143	2.93523	1.91691e-29	1.63877e-26				hypothetical protein
DN105216_c0_g1	Up	-3.28559	3.51044	8.23436e-28	5.73998e-25				hypothetical protein
DN112540_c4_g1	Up	-4.57594	2.95843	1.01825e-34	1.22604e-31				hypothetical protein
DN112540_c13_g1	Up	-4.04736	5.58273	2.36505e-24	1.09347e-21				hypothetical protein
DN93432_c0_g1	Up	5.928	6.75547	1.56156e-06	4.94786e-05				hypothetical protein
DN73921_c1_g1	Up	-8.41826	2.18784	6.27991e-26	3.79391e-23				hypothetical protein
DN113230_c0_g1	Up	-3.42013	5.85235	2.98878e-20	9.0281e-18				hypothetical protein
DN113597_c48_g1	Up	-5.28624	5.18693	2.39099e-25	1.33748e-22				hypothetical protein
DN113605_c2_g1	Up	-2.57989	6.81973	3.57069e-13	4.0447e-11				hypothetical protein
DN15114_c0_g1	Up	-9.63334	0.568172	1.67e-28	1.24045e-25				hypothetical protein
DN50687_c1_g1	Up	-10.4407	1.35453	4.40196e-23	2.21641e-20				hypothetical protein
DN110429_c5_g1	Up	-9.54379	0.495868	4.87173e-23	2.42889e-20				hypothetical protein
DN61249_c1_g1	Up	-4.02944	7.12811	1.67516e-21	6.22142e-19				hypothetical protein
DN109501_c0_g1	Up	-3.64609	2.36852	6.72126e-26	4.00711e-23				hypothetical protein
DN110984_c2_g1	Up	-2.95349	4.97228	1.52094e-21	5.69537e-19				hypothetical protein
DN104160_c1_g1	Up	-4.92765	5.72872	8.37623e-23	3.38863e-20				hypothetical protein
DN96559_c0_g1	Up	-7.43993	2.034	8.70917e-29	6.80367e-26				hypothetical protein
DN106191_c0_g1	Up	-4.79098	2.34126	1.40978e-28	1.06462e-25				hypothetical protein
DN33722_c0_g1	Up	-7.96937	1.74838	3.04425e-38	5.10871e-35				hypothetical protein
DN96658_c7_g1	Up	-2.00827	7.1277	4.67723e-10	3.17729e-08				hypothetical protein
DN108234_c1_g1	Up	-7.56466	2.25535	7.76473e-26	4.51051e-23				hypothetical protein
DN51215_c0_g1	Up	-4.03459	2.24279	3.23055e-25	1.74257e-22				hypothetical protein
DN112540_c14_g1	Up	-3.77929	3.24532	3.97185e-26	2.43195e-23				hypothetical protein
DN101140_c1_g1	Up	-6.85279	1.8337	1.05878e-31	9.79049e-29				hypothetical protein
DN111756_c0_g2	Up	-3.42443	3.20031	4.85179e-24	2.19835e-21				hypothetical protein
DN87458_c0_g1	Up	-7.0072	0.0237533	3.65522e-19	9.30438e-17				hypothetical protein
DN56827_c1_g1	Up	-2.99789	5.67117	4.21802e-19	1.04436e-16				hypothetical protein
DN27663_c0_g1	Up	-4.02684	3.68662	1.80091e-23	7.69804e-21				hypothetical protein
DN96650_c0_g1	Up	-2.70323	3.41616	2.11566e-20	6.56581e-18				hypothetical protein
DN100017_c0_g1	Up	-2.66133	4.26997	3.56676e-19	9.1305e-17				hypothetical protein
DN104881_c0_g1	Up	-2.94404	1.76363	5.38499e-21	1.78098e-18				hypothetical protein
DN94129_c2_g1	Up	-2.39206	6.30026	1.91183e-13	2.30386e-11				hypothetical protein
DN130211_c0_g1	Up	-5.3842	1.95853	7.00495e-26	4.12201e-23				hypothetical protein
DN105662_c1_g1	Up	-2.89802	5.7357	1.44324e-17	3.02747e-15				hypothetical protein
DN59476_c0_g1	Up	-2.50417	2.24518	1.75872e-18	4.00441e-16				hypothetical protein
DN112226_c0_g1	Up	-2.63477	4.28552	7.21154e-20	2.06807e-17				hypothetical protein
DN131705_c0_g1	Up	-3.86573	0.709509	6.85886e-19	1.64431e-16				hypothetical protein
DN10871_c0_g1	Up	-3.58333	1.92941	4.27984e-21	1.43644e-18				hypothetical protein
DN67100_c0_g1	Up	-5.45431	0.75726	1.80867e-21	6.59849e-19				hypothetical protein
DN110190_c0_g1	Up	-3.29965	1.38573	1.32471e-17	2.79175e-15				hypothetical protein
DN96564_c0_g1	Up	-2.61186	2.80011	2.05896e-19	5.4523e-17				hypothetical protein
DN101362_c0_g1	Up	-2.58278	3.33828	8.83111e-19	2.09496e-16				hypothetical protein
DN67287_c0_g1	Up	-2.69493	2.34744	5.4159e-19	1.33367e-16				hypothetical protein
DN67287_c0_g1	Up	-2.70744	3.61447	2.27704e-17	5.7325e-15				hypothetical protein
DN115912_c0_g1	Up	-5.43168	0.440307	2.99466e-23	1.26811e-20				hypothetical protein
DN105832_c2_g1	Up	-2.41873	4.71051	1.49128e-11	1.31204e-09				hypothetical protein
DN109081_c0_g1	Up	-9.29815	0.264981	3.67856e-17	9.03717e-15				hypothetical protein
DN112540_c10_g1	Up	-3.83996	6.21036	3.35485e-17	6.66702e-15				hypothetical protein
DN34726_c0_g1	Up	-4.07609	2.1174	7.1085e-21	2.30062e-18				hypothetical protein
DN92542_c0_g1	Up	-2.56894	2.54424	8.97227e-19	2.11736e-16				hypothetical protein
DN83323_c0_g1	Up	-2.91299	1.7932	1.14761e-17	2.44122e-15				hypothetical protein
DN105836_c0_g1	Up	-2.53673	1.71252	7.77748e-14	9.92893e-12				hypothetical protein
DN113043_c15_g1	Up	-3.7904	1.34226	1.20279e-18	2.78052e-16				hypothetical protein
DN109776_c0_g1	Up	-2.47636	3.71457	7.32467e-18	1.59558e-15				hypothetical protein
DN98046_c0_g1	Up	-2.99442	2.12553	5.21942e-20	1.5457e-17				hypothetical protein
DN131316_c0_g1	Up	-3.93179	1.43082	3.5613e-21	1.22244e-18				hypothetical protein
DN109092_c0_g1	Up	-2.95595	2.81121	7.72368e-16	1.27258e-13				hypothetical protein
DN107249_c0_g1	Up	-2.59931	4.21139	1.59577e-17	3.31672e-15				hypothetical protein
DN116824_c0_g1	Up	-9.30042	0.256313	5.58244e-24	2.47981e-21				hypothetical protein
DN97759_c0_g1	Up	-4.14292	0.725461	7.61949e-20	2.15774e-17				hypothetical protein
DN110641_c0_g1	Up	-2.31633	5.39259	2.84308e-15	4.39659e-13				hypothetical protein
DN41729_c0_g1	Up	-3.2215	3.38327	4.95565e-18	1.09e-15				hypothetical protein
DN112540_c11_g1	Up	-3.8455	6.1406	1.12363e-15	1.81181e-13				hypothetical protein
DN36877_c0_g1	Up	-3.62456	1.43701	1.71853e-16	3.0536e-14				hypothetical protein
DN112488_c0_g1	Up	-2.55732	2.79031	9.72738e-16	1.5741e-13				hypothetical protein
DN129495_c0_g1	Up	-5.17454	0.436191	4.21185e-19	1.04436e-16				hypothetical protein
DN113230_c0_g2	Up	-3.05722	2.79531	1.10931e-17	2.37088e-15				hypothetical protein
DN60614_c0_g1	Up	-2.40114	5.95011	1.17926e-13	1.46791e-11				hypothetical protein
DN79777_c0_g1	Up	-6.15471	0.446362	4.91732e-17	9.40225e-15				hypothetical protein
DN112468_c2_g1	Up	-2.85315	1.12577	1.04202e-14	1.52303e-12				hypothetical protein
DN112096_c1_g1	Up	-2.13704	4.59184	5.48327e-12	5.20853e-10				hypothetical protein
DN20757_c0_g1	Up	-4.4955	0.225375	2.63234e-16	4.55234e-14				hypothetical protein
DN132023_c0_g1	Up	-2.31151	4.36517	9.56925e-15	1.40318e-12				hypothetical protein
DN103464_c3_g1	Up	-2.32483	5.03478	7.95397e-14	1.01234e-11				hypothetical protein
DN110984_c0_g1	Up	-2.53155	6.06591	9.95639e-14	1.25312e-11				hypothetical protein
DN113605_c2_g4	Up	-2.21472	5.21027	3.38113e-13	3.85081e-11				hypothetical protein
DN100982_c0_g1	Up	-4.29751	1.22091	3.75493e-17	7.39722e-15				hypothetical protein
DN113605_c2_g3	Up	-2.28096	4.34972	7.30163e-15	1.09187e-12				hypothetical protein
DN109136_c0_g1	Up	-3.44775	1.71192	6.24557e-20	1.81402e-17				hypothetical protein
DN60903_c0_g1	Up	-2.42786	6.26671	4.31014e-13	4.81016e-11				hypothetical protein
DN60903_c1_g1	Up	-2.28269	4.6533	1.51357e-14	2.1634e-12				hypothetical protein
DN131915_c0_g1	Up	-2.49332	1.86362	2.45698e-17	4.99218e-15				hypothetical protein
DN98812_c1_g1	Up	-2.87277	2.39075	1.01544e-18	2.37162e-16				hypothetical protein
DN86012_c0_g1	Up	-2.29612	2.03756	1.57512e-14	2.2443e-12				hypothetical protein
DN13760_c0_g1	Up	-3.32002	2.26959	8.84236e-21	2.82146e-18				hypothetical protein
DN84673_c0_g1	Up	-5.8766	-0.271485	1.85097e-14	2.59651e-12				hypothetical protein
DN33302_c0_g1	Up	-10.2965	8.09391	2.95118e-15	4.54823e-13				hypothetical protein
DN83609_c0_g1	Up	-3.68046	1.11324	2.79545e-16	4.79779e-14				hypothetical protein
DN107029_c0_g1	Up	-5.4092	2.83553	5.68399e-44	1.51495e-40				hypothetical protein
DN91696_c0_g1	Up	-2.96083	1.76867	1.86946e-11	1.61343e-09				hypothetical protein
DN39067_c0_g1	Up	-9.3364	0.289012	1.88952e-24	8.82619e-22				hypothetical protein
DN101970_c0_g1	Up	-8.02908	1.84389	2.50676e-20	7.6229e-18				hypothetical protein
DN111404_c1_g2	Up	-2.19207	5.85318	7.14968e-11	5.58538e-09				hypothetical protein
DN39236_c0_g1	Up	-4.66521	1.3652	1.67073e-20	5.22073e-18				hypothetical protein
DN107487_c0_g2	Up	-3.28698	1.65773	2.10087e-16	3.68006e-14				hypothetical protein
DN112540_c12_g1	Up	-4.04226	5.91004	7.74826e-14	9.92893e-12				hypothetical protein
DN125579_c0_g1	Up	-8.8125	-0.191904	1.24573e-12	1.32187e-10				hypothetical protein
DN113043_c3_g1	Up	-2.48513	5.80463	2.30187e-12	2.32289e-10				hypothetical protein
DN97431_c0_g1	Up	-2.49958	1.249	6.66465e-14	8.62786e-12				hypothetical protein
DN84191_c0_g1	Up	-4.06634	3.35792	1.47675e-13	1.80355e-11				hypothetical protein
DN101192_c0_g1	Up	-2.40275	4.41503	6.83567e-13	9.00573e-11				hypothetical protein
DN103464_c2_g1	Up	-2.41172	6.25066	4.80075e-12	4.60852e-10				hypothetical protein
DN90483_c0_g2	Up	-4.43222	2.27817	2.58232e-25	1.42689e-22				hypothetical protein
DN75670_c0_g1	Up	-8.36578	-0.597791	3.73252e-13	4.20698e-11				hypothetical protein
DN94443_c0_g1	Up	-2.44096	2.79008	7.59699e-15	1.12859e-12				hypothetical protein
DN91451_c0_g1	Up	-2.08339	5.56049	1.04285e-12	1.34261e-10				hypothetical protein
DN107487_c0_g1	Up	-3.55414	1.9824	2.31918e-14	3.1843e-12				hypothetical protein
DN3009_c0_g1	Up	-2.29174	2.27862	1.23069e-13	1.52775e-11				hypothetical protein
DN107602_c0_g1	Up	-8.83349	-0.16538	1.36587e-12	1.73216e-10				hypothetical protein
DN104050_c0_g2	Up	-4.16268	2.24763	6.06098e-17	1.13952e-14				hypothetical protein
DN91580_c0_g2	Up	-4.71827	1.34628	6.41749e-17	1.20156e-14				hypothetical protein
DN12956_c0_g1	Up	-4.54287	1.37765	2.15948e-20	6.65619e-18				hypothetical protein
DN108188_c0_g1	Up	-2.62155	4.98443	6.59342e-13	7.21613e-11				hypothetical protein
DN56496_c0_g1	Up	-3.14635	1.48331	3.69077e-16	6.28679e-14				hypothetical protein
DN85086_c0_g1	Up	-2.34025	2.0475	6.6613e-13	7.27286e-11				hypothetical protein
DN110725_c1_g1	Up	-4.15145	1.12367	1.58483e-19	4.24903e-17				hypothetical protein
DN90684_c0_g1	Up	-5.90523	0.319766	2.2295e-17	4.5504e-15				hypothetical protein
DN88363_c0_g1	Up	-6.51968	0.84321	4.20009e-17	8.16764e-15				hypothetical protein
DN97456_c0_g1	Up	-2.70529	3.86357	1.83516e-13	2.22329e-11				hypothetical protein
DN108762_c0_g1	Up	-5.69998	2.04184	1.21052e-18	2.78419e-16				hypothetical protein
DN92542_c0_g2	Up	-3.02482	2.21716	3.05848e-14	4.1e-12				hypothetical protein
DN100114_c0_g1	Up	-3.03253	0.422596	1.0471e-08	5.55551e-07				hypothetical protein
DN94289_c0_g1	Up	-2.91977	2.0927	2.04921e-15	3.22395e-13				hypothetical protein
DN13409_c0_g1	Up	-2.55944	2.61487	1.13421e-13	1.41573e-11				hypothetical protein
DN36465_c0_g1	Up	-9.97093	0.889787	1.52173e-19	4.12871e-17				hypothetical protein
DN90489_c0_g1	Up	-2.83805	3.24219	1.85802e-14	2.59836e-12				hypothetical protein
DN107446_c0_g2	Up	-9.64142	0.576428	8.7103e-27	5.80388e-24				hypothetical protein
DN128446_c0_g1	Up	-2.48612	2.51752	1.34336e-14	1.93845e-12				hypothetical protein
DN99423_c0_g1	Up	-2.48568	2.04944	3.45425e-14	4.6033e-12				hypothetical protein
DN113043_c21_g1	Up	-2.64363	5.22032	3.73052e-12	3.65075e-10				hypothetical protein
DN46233_c0_g1	Up	-9.24813	0.207553	7.70916e-23	3.17547e-20				hypothetical protein
DN51069_c0_g1	Up	-3.41263	1.5	8.77775e-17	1.62335e-14				hypothetical protein
DN120472_c0_g1	Up	-3.2076	0.586462	4.35511e-14	5.76989e-12				hypothetical protein
DN58404_c0_g1	Up	-2.58442	2.65298	9.68103e-17	1.76874e-14				hypothetical protein
DN99917_c1_g1	Up	-2.86838	3.47329	6.17981e-12	6.83191e-10				hypothetical protein
DN103069_c0_g1	Up	-2.41612	3.2708	3.48568e-16	5.95985e-14				hypothetical protein
DN117820_c0_g1	Up	-4.23003	1.43783	9.65747e-17	1.76874e-14				hypothetical protein
DN102839_c0_g1	Up	-4.42486	1.01904	3.76494e-18	8.36224e-16				hypothetical protein
DN22486_c0_g1	Up	-2.30863	0.802613	1.58152e-10	1.15765e-08				hypothetical protein
DN111703_c0_g1	Up	-2.91072	0.740432	1.37935e-13	1.69832e-11				hypothetical protein
DN113065_c1_g1	Up	-3.15039	3.53088	2.82184e-13	3.29529e-11				hypothetical protein
DN110747_c0_g1	Up	-9.2188	0.191331	1.18261e-11	1.23491e-09				hypothetical protein
DN27648_c0_g1	Up	-3.87569	1.34556	1.45125e-19	4.00951e-17				hypothetical protein
DN112868_c0_g2	Up	-2.55806	3.79214	2.0775e-13	2.48368e-11				hypothetical protein
DN126338_c0_g1	Up	-5.61838	-0.0372737	1.38849e-16	2.51649e-14				hypothetical protein
DN101697_c0_g1	Up	-8.79422	-0.200457	1.48023e-11	1.51766e-09				hypothetical protein
DN69641_c0_g1	Up	-2.94306	0.81732	2.00653e-11	1.72844e-09				hypothetical protein
DN111062_c0_g1	Up	-3.65518	3.37828	2.55557e-14	3.46686e-12				hypothetical protein
DN106654_c0_g1	Up	-2.01514	3.47214	1.74612e-11	1.74454e-09				hypothetical protein
DN104411_c0_g1	Up	-2.13309	2.06784	1.87485e-11	1.86583e-09				hypothetical protein
DN112868_c0_g1	Up	-2.38028	2.71913	1.39726e-12	1.47232e-10				hypothetical protein
DN105255_c0_g1	Up	-3.90701	0.024059	1.80728e-11	1.56275e-09				hypothetical protein
DN54501_c0_g1	Up	-5.79291	0.171525	2.13511e-13	2.54584e-11				hypothetical protein
DN55107_c0_g1	Up	-2.95047	3.1427	2.04486e-13	2.45763e-11				hypothetical protein
DN98516_c0_g1	Up	-4.42804	0.944347	5.45986e-19	1.33722e-16				hypothetical protein
DN114043_c0_g1	Up	-2.62419	0.974522	1.95627e-12	2.00539e-10				hypothetical protein
DN87789_c0_g1	Up	-8.39364	-0.564688	5.25724e-11	4.8698e-09				hypothetical protein
DN56948_c0_g1	Up	-2.27641	2.94291	3.38253e-13	3.85081e-11				hypothetical protein
DN81914_c0_g1	Up	-6.29614	-0.611339	5.62332e-11	5.16188e-09				hypothetical protein
DN112434_c0_g1	Up	-2.58952	3.77909	6.06119e-12	5.73346e-10				hypothetical protein
DN105832_c2_g2	Up	-2.14618	4.84766	5.20655e-11	4.21266e-09				hypothetical protein
DN113043_c19_g3	Up	-2.50269	7.23426	2.59532e-10	1.83454e-08				hypothetical protein
DN6109_c0_g1	Up	-2.73036	1.03718	1.50431e-14	2.15697e-12				hypothetical protein
DN113271_c17_g2	Up	-2.87155	5.53508	6.67287e-11	5.24909e-09				hypothetical protein
DN113043_c18_g1	Up	-2.41547	6.85473	2.75623e-10	1.9392e-08				hypothetical protein
DN104818_c0_g1	Up	-2.16858	5.85275	7.07955e-10	4.66921e-08				hypothetical protein
DN97454_c0_g1	Up	-2.55437	0.54548	1.4795e-09	9.17048e-08				hypothetical protein
DN32769_c0_g1	Up	-6.58596	0.378196	2.31955e-18	5.25494e-16				hypothetical protein
DN108867_c6_g1	Up	-2.04265	4.37202	2.93237e-11	2.46504e-09				hypothetical protein
DN102767_c0_g1	Up	-2.07297	2.24507	9.10654e-12	8.38653e-10				hypothetical protein
DN107431_c0_g1	Up	-2.57073	0.363869	2.09659e-09	1.26662e-07				hypothetical protein
DN107782_c1_g1	Up	-8.66932	-0.315747	1.40019e-10	1.18282e-08				hypothetical protein
DN106859_c0_g1	Up	-3.13839	0.0171619	2.41641e-07	9.34195e-06				hypothetical protein
DN130117_c0_g1	Up	-3.37827	1.02945	8.75715e-16	1.42729e-13				hypothetical protein
DN24276_c0_g1	Up	-8.27209	-0.673351	2.09839e-10	1.72672e-08				hypothetical protein
DN107134_c0_g1	Up	-2.3687	2.77331	3.37346e-11	2.80461e-09				hypothetical protein
DN128233_c1_g1	Up	-2.33617	2.72371	7.53751e-13	8.17045e-11				hypothetical protein
DN101140_c0_g1	Up	-5.68954	1.42658	1.58484e-14	2.25107e-12				hypothetical protein
DN10886_c0_g1	Up	-8.3223	-0.62734	2.5126e-10	2.02176e-08				hypothetical protein
DN100885_c0_g1	Up	-2.57594	-0.00811208	2.229e-05	0.000484858				hypothetical protein
DN83332_c0_g1	Up	-4.34958	1.42903	1.28247e-13	1.58767e-11				hypothetical protein
DN21942_c0_g1	Up	-2.27579	0.64322	6.52315e-10	4.32111e-08				hypothetical protein
DN31326_c0_g1	Up	-8.19162	-0.74421	2.85306e-10	2.27057e-08				hypothetical protein
DN34781_c0_g1	Up	-3.55456	1.14262	2.54101e-14	3.45745e-12				hypothetical protein
DN34703_c0_g1	Up	-2.14403	4.29986	3.04498e-11	2.54554e-09				hypothetical protein
DN21955_c0_g1	Up	-4.75536	0.711008	4.43516e-15	6.69856e-13				hypothetical protein
DN111493_c1_g1	Up	-2.61663	3.26	3.90602e-10	3.03262e-08				hypothetical protein
DN80586_c0_g1	Up	-9.24687	0.205715	3.95256e-22	1.53069e-19				hypothetical protein
DN105289_c5_g1	Up	-8.3287	-0.624359	3.94481e-10	3.05342e-08				hypothetical protein
DN23506_c0_g1	Up	-2.0064	2.36629	4.08042e-10	3.15358e-08				hypothetical protein
DN34331_c0_g1	Up	-9.3112	0.266566	6.72881e-21	2.1934e-18				hypothetical protein
DN110142_c0_g1	Up	-2.05677	4.89117	6.88172e-09	3.81653e-07				hypothetical protein
DN895_c0_g1	Up	-3.79086	1.46038	4.07805e-19	1.02086e-16				hypothetical protein
DN11124_c0_g1	Up	-3.01081	1.24865	8.41552e-11	6.48482e-09				hypothetical protein
DN60385_c0_g1	Up	-2.66442	2.43547	5.81097e-12	5.50827e-10				hypothetical protein
DN58239_c0_g1	Up	-2.17338	2.04259	4.17593e-13	4.68345e-11				hypothetical protein
DN96518_c0_g1	Up	-3.87282	0.518584	1.45338e-12	1.52437e-10				hypothetical protein
DN109179_c0_g2	Up	-8.59936	-0.377773	9.24407e-10	6.71568e-08				hypothetical protein
DN59588_c0_g1	Up	-2.14788	1.39943	7.12795e-10	4.68748e-08				hypothetical protein
DN99951_c0_g1	Up	-2.4051	5.06344	1.66168e-10	1.20465e-08				hypothetical protein
DN38912_c0_g1	Up	-2.00733	2.41644	5.83997e-13	6.43818e-11				hypothetical protein
DN106307_c0_g1	Up	-2.74056	2.13651	6.42237e-16	1.06593e-13				hypothetical protein
DN88246_c0_g1	Up	-2.01172	1.76188	5.4592e-11	4.40136e-09				hypothetical protein
DN27512_c0_g1	Up	-2.43743	2.12859	2.71684e-13	3.18088e-11				hypothetical protein
DN108234_c0_g1	Up	-8.08057	-0.848917	1.67761e-11	1.45897e-09				hypothetical protein
DN107619_c0_g1	Up	-13.2072	4.07924	1.11755e-09	7.89333e-08				hypothetical protein
DN75839_c0_g1	Up	-8.08403	-0.838849	1.16102e-09	8.18901e-08				hypothetical protein
DN111846_c0_g1	Up	-2.51222	3.00927	1.29649e-09	9.08147e-08				hypothetical protein
DN87100_c0_g1	Up	-2.52492	1.60145	2.02965e-15	3.20431e-13				hypothetical protein
DN94121_c2_g1	Up	-3.33752	2.54404	7.27787e-11	5.67574e-09				hypothetical protein
DN8761_c0_g1	Up	-4.48827	3.85411	6.4745e-11	5.11971e-09				hypothetical protein
DN43800_c0_g1	Up	-4.01053	0.233149	1.61455e-14	2.28611e-12				hypothetical protein
DN66077_c0_g1	Up	-4.23546	0.472043	2.08853e-12	2.12462e-10				hypothetical protein
DN99988_c0_g1	Up	-2.087	3.57162	9.26242e-11	7.06527e-09				hypothetical protein
DN113770_c0_g1	Up	-3.22695	0.909349	6.54501e-15	9.81968e-13				hypothetical protein
DN82920_c0_g1	Up	-2.53494	1.94726	2.53127e-13	2.9713e-11				hypothetical protein
DN82616_c0_g1	Up	-2.24655	1.69641	8.7805e-08	3.7782e-06				hypothetical protein
DN91737_c0_g1	Up	-4.81198	0.355877	3.44542e-18	7.69026e-16				hypothetical protein
DN108996_c0_g1	Up	-2.3813	0.886809	6.06754e-10	4.03701e-08				hypothetical protein
DN9648_c0_g1	Up	-8.05374	-0.86617	2.75798e-09	1.82687e-07				hypothetical protein
DN97878_c0_g1	Up	-2.05804	2.58457	2.15417e-12	2.1787e-10				hypothetical protein
DN86348_c0_g1	Up	-3.61625	0.0526167	3.65032e-11	3.01817e-09				hypothetical protein
DN18121_c0_g1	Up	-2.91579	1.31645	1.15588e-11	1.04956e-09				hypothetical protein
DN3355_c0_g1	Up	-2.95104	0.662896	2.26886e-10	1.62148e-08				hypothetical protein
DN101865_c0_g1	Up	-5.81845	-0.334222	1.40372e-11	1.24466e-09				hypothetical protein
DN40444_c0_g1	Up	-2.01727	2.46867	1.57708e-12	1.6427e-10				hypothetical protein
DN106687_c0_g1	Up	-6.1605	4.0149	2.33575e-07	9.07658e-06				hypothetical protein
DN95914_c0_g1	Up	-2.73947	1.31057	6.6364e-11	5.22948e-09				hypothetical protein
DN100079_c0_g1	Up	-2.54237	0.883089	3.88552e-09	2.48859e-07				hypothetical protein
DN3485_c0_g1	Up	-6.65758	0.544213	2.8423e-13	3.31066e-11				hypothetical protein
DN13780_c0_g1	Up	-5.77965	0.865646	5.17146e-12	4.93303e-10				hypothetical protein
DN48381_c0_g1	Up	-4.71721	-0.111372	2.31756e-11	1.97014e-09				hypothetical protein
DN88923_c0_g1	Up	-2.41102	1.65099	1.19106e-11	1.07504e-09				hypothetical protein
DN82031_c0_g1	Up	-3.38478	1.34374	3.01745e-13	3.49669e-11				hypothetical protein
DN72196_c0_g1	Up	-3.56804	-0.0618645	8.10838e-11	6.27214e-09				hypothetical protein
DN78977_c0_g1	Up	-6.29279	-0.546433	4.7458e-09	2.98692e-07				hypothetical protein
DN91103_c0_g1	Up	-2.21167	1.03407	2.68848e-08	1.29867e-06				hypothetical protein
DN89197_c0_g1	Up	-2.67089	0.33762	4.19622e-10	2.88514e-08				hypothetical protein
DN83661_c0_g1	Up	-3.4569	0.256078	2.31344e-11	1.97014e-09				hypothetical protein
DN30250_c0_g1	Up	-5.58854	-0.0772944	1.40756e-13	1.72837e-11				hypothetical protein
DN53328_c0_g1	Up	-3.33798	2.07043	6.78768e-12	6.36749e-10				hypothetical protein
DN111404_c1_g1	Up	-2.55208	1.93962	1.58763e-10	1.16025e-08				hypothetical protein
DN110473_c1_g1	Up	-2.86543	1.0572	1.05315e-11	9.65957e-10				hypothetical protein
DN43298_c0_g1	Up	-8.81604	-0.181758	8.43735e-09	5.04199e-07				hypothetical protein
DN102739_c0_g1	Up	-2.26263	2.86694	1.23958e-10	9.25291e-09				hypothetical protein
DN90465_c0_g1	Up	-2.38469	0.670638	6.4961e-10	4.30949e-08				hypothetical protein
DN17688_c0_g1	Up	-2.10492	2.87439	1.02526e-08	6.01367e-07				hypothetical protein
DN106733_c1_g1	Up	-2.53074	2.96641	1.03891e-08	6.07974e-07				hypothetical protein
DN99161_c0_g1	Up	-8.07314	-0.853893	1.78185e-10	1.28765e-08				hypothetical protein
DN107719_c0_g1	Up	-2.76406	0.41088	1.8514e-09	1.12751e-07				hypothetical protein
DN102454_c0_g1	Up	-2.78657	1.44242	1.28805e-11	1.15339e-09				hypothetical protein
DN101489_c0_g1	Up	-4.33244	1.18176	1.46398e-12	1.53194e-10				hypothetical protein
DN90043_c0_g1	Up	-8.47709	-0.49547	4.04668e-11	3.32165e-09				hypothetical protein
DN84456_c0_g1	Up	-2.63012	0.676158	1.06615e-09	6.78473e-08				hypothetical protein
DN4846_c0_g1	Up	-4.26371	0.409834	3.25257e-12	3.18991e-10				hypothetical protein
DN44263_c0_g1	Up	-3.25436	0.696111	1.04967e-13	1.31382e-11				hypothetical protein
DN80995_c0_g1	Up	-2.46303	0.401147	6.11967e-06	0.000161812				hypothetical protein
DN102346_c1_g1	Up	-2.39866	2.98292	2.18027e-14	3.03031e-12				hypothetical protein
DN10566_c0_g1	Up	-6.92136	3.45799	1.92842e-09	1.16814e-07				hypothetical protein
DN5267_c0_g1	Up	-2.0029	1.69659	2.81057e-08	1.52538e-06				hypothetical protein
DN98908_c0_g1	Up	-3.45849	0.602397	1.76678e-10	1.2788e-08				hypothetical protein
DN125844_c0_g1	Up	-5.45955	-0.648581	4.53497e-11	3.69567e-09				hypothetical protein
DN99917_c1_g2	Up	-2.05043	1.61028	2.55122e-10	1.80901e-08				hypothetical protein
DN109529_c0_g1	Up	-2.83337	0.275802	4.26584e-11	3.49521e-09				hypothetical protein
DN122964_c0_g1	Up	-3.80236	-0.018874	1.26463e-09	7.96948e-08				hypothetical protein
DN87669_c0_g1	Up	-4.76181	0.208126	6.72425e-13	7.32019e-11				hypothetical protein
DN99244_c0_g1	Up	-2.18471	2.34819	8.50632e-10	5.50602e-08				hypothetical protein
DN88232_c0_g1	Up	-4.74398	0.661011	1.78471e-11	1.54618e-09				hypothetical protein
DN112468_c1_g1	Up	-2.2521	1.28363	3.64762e-09	2.12434e-07				hypothetical protein
DN101865_c1_g1	Up	-4.36176	-0.111692	8.98614e-09	4.82419e-07				hypothetical protein
DN51347_c0_g1	Up	-3.09873	0.347387	3.45171e-10	2.39139e-08				hypothetical protein
DN15539_c1_g1	Up	-2.13008	4.19169	7.17645e-09	3.97027e-07				hypothetical protein
DN53541_c0_g1	Up	-4.82835	1.11297	8.50449e-11	6.53116e-09				hypothetical protein
DN22072_c0_g1	Up	-2.3474	0.393948	6.39366e-09	3.57319e-07				hypothetical protein
DN15764_c0_g1	Up	-2.36426	3.92924	7.4525e-09	4.10794e-07				hypothetical protein
DN113133_c0_g1	Up	-2.1749	2.15364	4.72706e-12	4.54741e-10				hypothetical protein
DN96373_c0_g1	Up	-2.20259	2.89273	8.00959e-09	4.38302e-07				hypothetical protein
DN75471_c0_g1	Up	-3.05326	0.672522	7.74489e-10	5.04197e-08				hypothetical protein
DN107281_c0_g1	Up	-2.26854	1.13099	3.59016e-10	2.47973e-08				hypothetical protein
DN519_c0_g1	Up	-3.53898	1.28591	5.87005e-11	4.69086e-09				hypothetical protein
DN67275_c0_g1	Up	-2.77408	-0.169542	3.18008e-07	1.19576e-05				hypothetical protein
DN48533_c0_g1	Up	-3.14304	1.79898	4.48904e-11	3.66484e-09				hypothetical protein
DN121219_c0_g1	Up	-2.01551	2.28565	6.68422e-09	3.72066e-07				hypothetical protein
DN94352_c0_g1	Up	-2.03811	1.0277	1.1077e-07	4.64293e-06				hypothetical protein
DN101259_c19_g1	Up	-2.29143	6.23274	1.13762e-07	4.75513e-06				hypothetical protein
DN41899_c0_g1	Up	-4.13756	-0.478087	9.94669e-08	4.78552e-06				hypothetical protein
DN100865_c0_g1	Up	-2.26186	1.4718	6.35863e-09	3.5613e-07				hypothetical protein
DN11642_c0_g1	Up	-5.67127	3.19222	7.76e-09	4.25673e-07				hypothetical protein
DN92376_c0_g1	Up	-2.40545	3.17037	9.31274e-15	1.37e-12				hypothetical protein
DN107768_c0_g1	Up	-3.89406	2.12085	1.35143e-07	6.36347e-06				hypothetical protein
DN80437_c0_g1	Up	-3.57181	0.136735	8.0036e-09	4.38302e-07				hypothetical protein
DN105407_c2_g1	Up	-2.23314	1.39642	1.78777e-10	1.28987e-08				hypothetical protein
DN43787_c0_g1	Up	-4.39064	1.13053	6.97475e-11	5.46758e-09				hypothetical protein
DN87058_c0_g1	Up	-2.40133	0.597168	2.27411e-08	1.11924e-06				hypothetical protein
DN112520_c1_g1	Up	-9.63498	0.584402	1.63296e-07	7.55836e-06				hypothetical protein
DN113043_c19_g1	Up	-2.38851	7.55812	2.50722e-07	9.66006e-06				hypothetical protein
DN96208_c0_g1	Up	-8.88386	2.68921	1.8343e-07	8.39463e-06				hypothetical protein
DN107674_c0_g1	Up	-12.9277	3.80153	1.92823e-07	8.77751e-06				hypothetical protein
DN127929_c0_g1	Up	-2.67824	1.3082	7.51192e-09	4.13566e-07				hypothetical protein
DN62042_c0_g1	Up	-2.01456	1.04087	2.1724e-08	1.07929e-06				hypothetical protein
DN111379_c4_g1	Up	-4.83726	-0.750804	2.08444e-07	9.39734e-06				hypothetical protein
DN102175_c0_g1	Up	-4.70024	0.200702	1.19814e-11	1.07928e-09				hypothetical protein
DN108867_c7_g1	Up	-2.0325	7.1811	3.79805e-07	1.40826e-05				hypothetical protein
DN48242_c0_g1	Up	-2.20532	1.99543	5.31335e-10	3.58256e-08				hypothetical protein
DN43118_c0_g1	Up	-4.3106	0.746179	1.02868e-11	9.45423e-10				hypothetical protein
DN83780_c0_g1	Up	-3.03836	1.35411	1.78761e-08	9.11099e-07				hypothetical protein
DN128434_c0_g1	Up	-3.44617	1.25754	4.68934e-10	3.18075e-08				hypothetical protein
DN109537_c1_g1	Up	-2.12233	2.28689	7.41612e-09	4.09287e-07				hypothetical protein
DN98707_c0_g1	Up	-2.29733	0.169944	4.33134e-07	1.56877e-05				hypothetical protein
DN125764_c0_g1	Up	-2.85441	0.449507	1.25847e-09	7.94168e-08				hypothetical protein
DN34666_c0_g1	Up	-2.44497	2.03013	1.14395e-11	1.04081e-09				hypothetical protein
DN97982_c0_g1	Up	-3.30807	-0.290586	3.90989e-07	1.43913e-05				hypothetical protein
DN92565_c1_g1	Up	-3.62872	-0.15357	8.11184e-11	6.27214e-09				hypothetical protein
DN67100_c1_g1	Up	-4.24428	1.69294	5.76719e-10	3.85984e-08				hypothetical protein
DN36545_c0_g1	Up	-2.64023	0.739712	3.00496e-11	2.52139e-09				hypothetical protein
DN9577_c0_g1	Up	-7.91088	6.51526	4.77121e-08	2.1578e-06				hypothetical protein
DN106492_c0_g1	Up	-2.01876	2.12006	4.30045e-07	1.79405e-05				hypothetical protein
DN62736_c0_g1	Up	-2.74808	2.62206	1.84424e-08	9.36801e-07				hypothetical protein
DN76856_c0_g1	Up	-2.03323	2.0595	2.29095e-09	1.37852e-07				hypothetical protein
DN108867_c5_g1	Up	-3.1961	1.08031	4.71925e-07	1.94533e-05				hypothetical protein
DN7241_c0_g1	Up	-2.20201	2.76672	6.2697e-09	3.51585e-07				hypothetical protein
DN55641_c0_g1	Up	-3.09187	1.69258	3.92214e-09	2.27254e-07				hypothetical protein
DN7422_c0_g1	Up	-8.38028	-0.573285	5.00076e-07	2.04428e-05				hypothetical protein
DN91182_c0_g1	Up	-4.86169	2.8696	9.99195e-08	4.22722e-06				hypothetical protein
DN13509_c0_g1	Up	-2.00081	1.86583	5.45291e-07	2.20606e-05				hypothetical protein
DN116472_c0_g1	Up	-2.1708	0.774315	3.68476e-08	1.71413e-06				hypothetical protein
DN58545_c0_g1	Up	-2.42945	0.629711	6.30626e-07	2.50741e-05				hypothetical protein
DN50708_c0_g1	Up	-3.78019	0.256181	6.38677e-07	2.53546e-05				hypothetical protein
DN112498_c0_g1	Up	-2.35009	2.40948	7.62391e-07	2.98925e-05				hypothetical protein
DN69597_c0_g1	Up	-5.35345	0.470483	7.5433e-10	4.9178e-08				hypothetical protein
DN15662_c1_g1	Up	-2.27711	2.77889	3.40484e-08	1.59373e-06				hypothetical protein
DN89374_c0_g1	Up	-3.81196	4.20609	1.11566e-06	3.67108e-05				hypothetical protein
DN19507_c0_g1	Up	-3.46819	-0.119118	8.59598e-09	4.6589e-07				hypothetical protein
DN92668_c0_g1	Up	-4.64433	0.0730477	1.98065e-10	1.42224e-08				hypothetical protein
DN19507_c0_g1	Up	-3.46084	-0.320313	1.0892e-06	4.13359e-05				hypothetical protein
DN13866_c0_g1	Up	-2.3301	0.0658305	8.44053e-07	2.84978e-05				hypothetical protein
DN86122_c0_g1	Up	-2.44671	0.995332	1.04579e-06	3.45873e-05				hypothetical protein
DN108504_c0_g1	Up	-2.48061	1.43893	2.23634e-08	1.105e-06				hypothetical protein
DN128686_c0_g1	Up	-2.13403	1.44102	2.7699e-09	1.64273e-07				hypothetical protein
DN102067_c0_g1	Up	-6.37882	7.11379	3.17614e-06	9.19558e-05				hypothetical protein
DN107635_c0_g1	Up	-2.69895	0.389179	1.24171e-07	5.14748e-06				hypothetical protein
DN10898_c0_g1	Up	-2.1255	1.87813	3.06915e-08	1.44723e-06				hypothetical protein
DN54244_c0_g1	Up	-6.5918	2.76292	2.26907e-07	8.84021e-06				hypothetical protein
DN11379_c1_g1	Up	-3.91903	4.07069	3.0662e-07	1.15678e-05				hypothetical protein
DN105303_c0_g1	Up	-2.19656	-0.455156	3.6914e-05	0.000745022				hypothetical protein
DN28638_c0_g1	Up	-2.55018	0.336062	2.21077e-09	1.33382e-07				hypothetical protein
DN20013_c0_g1	Up	-2.85988	1.5454	4.69751e-06	0.000128529				hypothetical protein
DN166_c0_g1	Up	-3.79392	0.917118	1.1653e-08	6.12524e-07				hypothetical protein
DN55858_c0_g1	Up	-2.58304	0.989568	4.9857e-08	2.24109e-06				hypothetical protein
DN80922_c0_g1	Up	-2.20522	0.89399	4.7768e-09	2.73624e-07				hypothetical protein
DN127963_c0_g1	Up	-4.91415	1.32393	6.45496e-21	2.11938e-18				hypothetical protein
DN98882_c0_g1	Up	-3.07575	-0.27727	3.60511e-06	0.000118204				hypothetical protein
DN127974_c0_g1	Up	-4.12687	-0.282194	3.76559e-09	2.18742e-07				hypothetical protein
DN80558_c0_g1	Up	-2.95481	1.07312	4.64882e-08	2.11272e-06				hypothetical protein
DN32989_c0_g1	Up	-2.60385	0.33536	4.0474e-07	1.47893e-05				hypothetical protein
DN102810_c0_g1	Up	-2.37639	1.55351	1.82491e-08	9.29065e-07				hypothetical protein
DN119580_c0_g1	Up	-2.54204	1.03603	2.73719e-08	1.32079e-06				hypothetical protein
DN50092_c0_g1	Up	-5.77442	5.36259	1.07334e-06	3.54209e-05				hypothetical protein
DN53561_c0_g1	Up	-2.40908	-0.0527978	4.33595e-07	1.56918e-05				hypothetical protein
DN76946_c0_g1	Up	-2.53643	1.50035	3.83393e-07	1.4204e-05				hypothetical protein
DN88293_c0_g1	Up	-2.15531	0.856482	1.0639e-07	4.48839e-06				hypothetical protein
DN116080_c0_g1	Up	-2.45486	2.26815	1.84298e-07	7.30582e-06				hypothetical protein
DN87517_c0_g1	Up	-4.67545	2.11702	8.23573e-07	2.78478e-05				hypothetical protein
DN116514_c0_g1	Up	-3.74582	0.306698	8.67235e-10	5.60548e-08				hypothetical protein
DN103350_c0_g1	Up	-4.52517	-0.717536	6.96948e-06	0.000213454				hypothetical protein
DN53869_c0_g1	Up	-8.94525	-0.0614042	6.97188e-06	0.000213454				hypothetical protein
DN104783_c0_g1	Up	-2.26166	1.46373	4.05546e-07	1.48068e-05				hypothetical protein
DN113419_c3_g1	Up	-2.04342	3.9487	9.6114e-07	3.20451e-05				hypothetical protein
DN89555_c0_g1	Up	-4.25931	-0.263363	3.32019e-08	1.55572e-06				hypothetical protein
DN105321_c0_g2	Up	-2.21893	2.14204	3.30774e-11	2.75503e-09				hypothetical protein
DN60622_c0_g1	Up	-3.73493	-0.397196	8.33119e-06	0.000249367				hypothetical protein
DN17754_c0_g1	Up	-2.06433	1.82396	8.37682e-06	0.000250438				hypothetical protein
DN25827_c0_g1	Up	-9.17342	9.25696	6.84719e-06	0.000178405				hypothetical protein
DN104725_c0_g1	Up	-3.57215	-0.441998	9.14422e-06	0.000270046				hypothetical protein
DN112143_c0_g2	Up	-4.22566	0.731543	9.45397e-06	0.000278547				hypothetical protein
DN45010_c0_g1	Up	-2.18636	1.7489	3.97531e-07	1.45729e-05				hypothetical protein
DN24686_c0_g1	Up	-2.73442	0.332633	5.76992e-07	2.02349e-05				hypothetical protein
DN67067_c0_g1	Up	-2.74985	0.107375	1.37306e-09	8.5458e-08				hypothetical protein
DN126508_c0_g1	Up	-3.08873	0.301271	2.02397e-08	1.0167e-06				hypothetical protein
DN111464_c0_g1	Up	-2.29114	-0.00762016	6.54781e-06	0.00017187				hypothetical protein
DN32648_c0_g1	Up	-5.74858	3.80987	1.50339e-06	4.7836e-05				hypothetical protein
DN60155_c0_g1	Up	-5.22117	-0.772792	1.10686e-05	0.000316939				hypothetical protein
DN103705_c0_g1	Up	-3.10843	1.8741	2.64056e-06	7.81474e-05				hypothetical protein
DN107463_c0_g1	Up	-2.98549	4.27316	1.14089e-05	0.000324127				hypothetical protein
DN113306_c7_g1	Up	-3.93567	0.102853	1.23406e-05	0.000345388				hypothetical protein
DN98829_c0_g1	Up	-3.66523	0.473508	1.24398e-05	0.000347781				hypothetical protein
DN102051_c0_g1	Up	-2.45793	0.913132	1.27743e-05	0.00035569				hypothetical protein
DN111053_c1_g1	Up	-3.84482	0.140783	1.22913e-07	5.10934e-06				hypothetical protein
DN124749_c0_g1	Up	-3.12248	-0.0739356	2.13979e-07	8.35811e-06				hypothetical protein
DN86359_c0_g1	Up	-2.13719	3.09094	7.17952e-08	3.13094e-06				hypothetical protein
DN79544_c0_g1	Up	-3.71929	3.27537	2.46495e-06	7.36235e-05				hypothetical protein
DN102447_c0_g1	Up	-2.2207	0.600909	1.60267e-06	5.06396e-05				hypothetical protein
DN56178_c0_g1	Up	-2.1929	0.0075833	1.05746e-05	0.000258865				hypothetical protein
DN96539_c0_g1	Up	-2.21318	1.09352	1.03812e-05	0.000254806				hypothetical protein
DN102449_c0_g1	Up	-2.20688	2.60044	1.75994e-05	0.000466876				hypothetical protein
DN91175_c0_g1	Up	-4.46913	-0.485943	3.3802e-07	1.26785e-05				hypothetical protein
DN12087_c0_g1	Up	-3.26306	1.35244	1.43168e-06	4.57148e-05				hypothetical protein
DN92494_c0_g1	Up	-2.53661	0.773004	5.20955e-10	3.5178e-08				hypothetical protein
DN54821_c0_g1	Up	-2.17797	0.595345	4.88924e-06	0.000132806				hypothetical protein
DN69236_c0_g1	Up	-3.01561	-0.424674	3.03864e-07	1.14925e-05				hypothetical protein
DN92163_c0_g1	Up	-3.43246	-0.574888	2.4309e-05	0.000611078				hypothetical protein
DN87276_c0_g1	Up	-2.63915	2.21597	6.50539e-07	2.25007e-05				hypothetical protein
DN75343_c0_g1	Up	-4.6174	0.285181	2.56362e-05	0.000638446				hypothetical protein
DN128236_c0_g1	Up	-2.42301	1.93324	8.80064e-07	2.95701e-05				hypothetical protein
DN105250_c0_g1	Up	-2.02247	3.02963	2.69825e-05	0.000665777				hypothetical protein
DN109381_c0_g3	Up	-3.65116	-0.480138	4.60129e-07	1.65859e-05				hypothetical protein
DN131747_c0_g1	Up	-2.6465	0.0833872	8.75158e-08	3.76933e-06				hypothetical protein
DN108338_c1_g1	Up	-4.17066	0.815067	8.18127e-07	2.77075e-05				hypothetical protein
DN93233_c0_g1	Up	-2.23658	0.519507	7.79076e-06	0.000199034				hypothetical protein
DN76494_c0_g1	Up	-2.57909	0.893175	8.65225e-07	2.91258e-05				hypothetical protein
DN22872_c0_g1	Up	-5.88972	6.47242	9.19867e-06	0.000229152				hypothetical protein
DN91651_c0_g1	Up	-2.09337	0.105616	3.85666e-05	0.000899457				hypothetical protein
DN110756_c0_g1	Up	-3.19566	0.593112	4.20193e-05	0.000969533				hypothetical protein
DN59565_c0_g1	Up	-2.96487	1.2343	4.60822e-06	0.000126698				hypothetical protein
DN112720_c3_g2	Up	-12.4159	3.27259	2.46739e-67	3.72658e-63		PF01442.18	Cvel_22628	Apolipoprotein	GO:0005319	molecular_function
DN112720_c3_g3	Up	-8.5468	5.76631	4.74094e-62	4.29624e-58		PF01442.19	Cvel_22628	Apolipoprotein	GO:0005319	molecular_function
DN110424_c0_g1	Up	-5.39675	1.70287	4.45047e-39	7.7558e-36			Cvel_6240	Kinesin-like protein KIF19	GO:0042988	molecular_function
DN109123_c0_g1	Up	-3.66112	3.65933	3.6428e-25	1.94183e-22	Q48739		Cvel_18814	UPF0676 protein C1494.01	GO:0017038	biological_process
DN96295_c0_g1	Up	-10.0554	0.969017	5.70595e-33	5.62036e-30	P42825	PF01556.18	Cvel_12153	Chaperone protein dnaJ 2	GO:0061077	biological_process
DN107383_c0_g1	Up	-10.6102	1.50254	9.33413e-41	1.83882e-37			Cvel_16493	(R)-mandelonitrile lyase 2	GO:0046593	molecular_function
DN107383_c1_g1	Up	-9.46425	0.409598	6.37188e-25	3.10441e-22			Cvel_16493	(R)-mandelonitrile lyase 2	GO:0046593	molecular_function
DN105641_c0_g1	Up	-4.51739	1.43848	2.94435e-30	2.56555e-27			Cvel_6240	Kinesin-like protein KIF19	GO:0042988	molecular_function
DN110533_c0_g1	Up	-10.4501	1.36333	3.46777e-32	4.1988e-29			Cvel_3622	Acidic leucine-rich nuclear phosphoprotein	GO:0035872	biological_process
DN110180_c0_g1	Up	-3.91246	2.77697	1.04307e-31	9.79049e-29		PF12314.8	Cvel_17431	Ankyrin-1	GO:0030506	molecular_function
DN104697_c0_g1	Up	-9.95704	0.888758	4.3971e-27	3.49391e-24	Q20507	PF00887.19	Cvel_2997	Acyl-CoA-binding protein homolog 3	GO:0003735	molecular_function
DN100025_c0_g1	Up	-10.5843	1.47765	3.26418e-35	4.10833e-32			Cvel_18187	COBW domain-containing protein 2	GO:0070431	biological_process
DN112857_c0_g1	Up	-10.2767	1.19614	5.83624e-25	3.61946e-22			Cvel_9916	Conjugation stage-specific protein	GO:0019951	biological_process
DN131473_c0_g1	Up	-3.72885	1.48766	7.78679e-25	3.7534e-22			Cvel_18664	TPPP family protein CG4893	GO:0097655	molecular_function
DN104247_c0_g1	Up	-4.02216	1.17691	8.159e-22	3.10659e-19		PF12314.8	Cvel_1899	Inner membrane complex protein	GO:0098800	cellular_component
DN101802_c0_g1	Up	-3.22818	2.6866	1.42678e-25	8.1832e-23			Cvel_30158	UDP-glucuronosyltransferase 1-6	GO:0018715	molecular_function
DN86998_c0_g1	Up	-7.67837	0.683056	1.79125e-21	6.59849e-19		PF00612.27	Cvel_21973	Myosin-A	GO:0031035	biological_process
DN115561_c0_g1	Up	-7.95647	0.926135	5.56942e-33	5.62036e-30			Cvel_16493	(R)-mandelonitrile lyase 2	GO:0046593	molecular_function
DN35584_c0_g1	Up	-10.422	1.32066	5.69761e-33	5.62036e-30			Cvel_18187	COBW domain-containing protein 2	GO:0070431	biological_process
DN81023_c0_g1	Up	-9.28725	0.243868	2.54567e-24	1.16509e-21			Cvel_21973	Myosin-A	GO:0031035	biological_process
DN100532_c0_g1	Up	-5.53825	1.98137	2.28821e-25	1.29598e-22			Cvel_21913	Putative metal chaperone YciC	GO:0030001	biological_process
DN92722_c0_g1	Up	-2.57202	6.95274	1.47497e-15	2.3532e-13			Cvel_14536	Flocculation protein FLO11	GO:0000128	biological_process
DN111873_c0_g1	Up	-3.4928	1.69925	2.60017e-17	5.23617e-15	Q9FFU6	PF03188.16	Cvel_11399	Eukaryotic cytochrome b561	GO:0008805	molecular_function
DN113105_c1_g1	Up	-2.97194	3.36287	6.69941e-23	2.78486e-20			Cvel_15564	von Willebrand factor A domain-containing protein	GO:0061644	biological_process
DN108693_c0_g1	Up	-2.62806	3.33633	1.32663e-22	5.31942e-20	A0PJE2	PF00106.25	Cvel_23560	Dehydrogenase/reductase SDR family member 12	GO:0016629	molecular_function
DN111192_c0_g1	Up	-4.1166	0.635074	4.12766e-17	8.06139e-15	Q9XBR7	PF02678.16	Cvel_21405	Putative quercetin 2	GO:1901732	biological_process
DN107579_c0_g1	Up	-2.80158	4.23679	9.42832e-22	3.55998e-19			Cvel_8813	Thioredoxin	GO:0042964	biological_process
DN76797_c0_g1	Up	-10.1645	1.0734	2.16517e-35	2.80297e-32			Cvel_3446	Copper resistance protein A homolog	GO:0043848	molecular_function
DN82245_c0_g1	Up	-4.67455	1.29444	5.41322e-25	2.72526e-22			Cvel_18187	COBW domain-containing protein 2	GO:0070431	biological_process
DN38069_c0_g1	Up	-7.43823	0.420555	5.81088e-19	1.41554e-16	Q01989	PF00063.21	Cvel_23496	Myosin-D	GO:0031035	biological_process
DN69660_c0_g1	Up	-6.0571	-0.0903583	4.2866e-17	8.30026e-15			Cvel_18664	TPPP family protein CG4893	GO:0097655	molecular_function
DN71839_c0_g1	Up	-2.53297	4.87734	7.65695e-18	1.65998e-15			Cvel_14536	Flocculation protein FLO11	GO:0000128	biological_process
DN83820_c0_g1	Up	-2.8439	2.31325	7.61798e-20	2.15774e-17	Q5UQ40	PF04564.15	Cvel_13472	U-box domain-containing protein 36	GO:1990444	molecular_function
DN107446_c0_g1	Up	-4.8135	3.02767	1.69086e-31	1.53226e-28			Cvel_6240	Kinesin-like protein KIF19	GO:0042988	molecular_function
DN108647_c0_g1	Up	-7.60818	0.643342	3.08363e-18	8.90993e-16			Cvel_19014	RNA-binding protein 39	GO:0043021	molecular_function
DN111573_c12_g2	Up	-2.37631	6.46772	3.1139e-12	3.08732e-10			Cvel_4758	Flocculation protein FLO11	GO:0000128	biological_process
DN79052_c0_g1	Up	-5.2445	1.27564	3.73942e-19	9.46554e-17			Cvel_5632	Coiled-coil domain-containing protein 42 like-2	GO:0000128	biological_process
DN101672_c0_g1	Up	-3.03149	2.29138	5.86327e-22	2.25139e-19			Cvel_30158	UDP-glucuronosyltransferase 1-6	GO:0043541	cellular_component
DN111573_c13_g1	Up	-2.48532	4.99012	1.68018e-16	2.99721e-14			Cvel_4758	Flocculation protein FLO11	GO:0000128	biological_process
DN62608_c0_g1	Up	-2.37012	4.92206	1.66583e-16	2.98336e-14			Cvel_10623	Flocculation protein FLO11	GO:0000128	biological_process
DN91087_c0_g1	Up	-5.96485	1.53679	6.02625e-29	4.87588e-26		PF08856.11	Cvel_21945	COBW domain-containing protein DDB_G0274527	GO:0043849	molecular_function
DN113271_c16_g2	Up	-2.47144	7.89906	5.6476e-14	7.39574e-12			Cvel_10623	Flocculation protein FLO11	GO:0000128	biological_process
DN84873_c0_g1	Up	-3.03283	2.15127	4.73777e-18	1.04716e-15		PF13757.6	Cvel_15564	Vault protein inter-alpha-trypsin domain	GO:0000128	biological_process
DN111494_c30_g1	Up	-2.82219	4.27335	2.60295e-19	6.7394e-17			Cvel_11924	Cell wall protein DAN4	GO:0019904	molecular_function
DN78276_c0_g1	Up	-9.30264	0.268178	4.46652e-17	1.07142e-14			Cvel_20651	RNA-binding protein Musashi homolog 1	GO:0043848	molecular_function
DN109562_c0_g2	Up	-3.00454	3.02004	3.52872e-21	1.22051e-18			Cvel_1680	Protein phosphatase 1 regulatory subunit 7	GO:0034237	molecular_function
DN113462_c0_g1	Up	-2.16331	6.29248	4.10992e-12	3.98759e-10	Q3V096	PF12796.7	Cvel_4496	Ankyrin-3	GO:0030506	molecular_function
DN110831_c1_g1	Up	-2.31617	2.56904	9.1519e-16	1.48628e-13			Cvel_23501	Basic proline-rich protein	GO:0070064	molecular_function
DN110180_c0_g2	Up	-2.8328	1.48318	2.51003e-17	5.0772e-15	P16157	PF13637.6	Cvel_17431	Ankyrin-1	GO:0030506	molecular_function
DN124298_c0_g1	Up	-5.14483	1.33104	4.03743e-25	2.12716e-22			Cvel_6240	Kinesin-like protein KIF19	GO:0042988	molecular_function
DN95991_c0_g1	Up	-2.66259	1.93613	1.23766e-17	2.62048e-15		PF02544.16	Cvel_29695	3-oxo-5-alpha-steroid 4-dehydrogenase	GO:0003865	molecular_function
DN51129_c0_g1	Up	-2.56667	3.02091	5.05027e-17	9.57438e-15			Cvel_10384	Extracellular serine proteinase	GO:0004867	molecular_function
DN109562_c0_g1	Up	-2.7363	2.32871	1.85253e-17	3.81537e-15	Q54Q39		Cvel_1680	Protein phosphatase 1 regulatory subunit 7	GO:0034237	molecular_function
DN18399_c0_g1	Up	-2.62653	4.63708	4.24271e-16	7.19989e-14			Cvel_2515	Sialidase	GO:0052798	molecular_function
DN106578_c0_g1	Up	-2.41027	1.64089	6.05539e-15	9.11527e-13	P48422	PF00067.22	Cvel_28088	Cytochrome P450	GO:0045328	biological_process
DN93840_c0_g1	Up	-9.75417	0.681165	8.03408e-14	1.01968e-11	P31521	PF02492.19	Cvel_20111	Putative metal chaperone YciC	GO:0030001	biological_process
DN89225_c0_g1	Up	-2.90508	3.64111	1.34467e-19	3.73786e-17	Q9FGT8	PF08212.12	Cvel_23560	Dehydrogenase/reductase SDR family member 12	GO:0016629	molecular_function
DN112841_c1_g1	Up	-2.92411	5.51079	2.20712e-15	3.46036e-13			Cvel_15980	Prostaglandin reductase 1	GO:0036132	molecular_function
DN104494_c0_g1	Up	-3.21575	2.41639	1.43121e-16	2.58358e-14			Cvel_9271	Carbonic anhydrase	GO:0004089	molecular_function
DN102763_c0_g1	Up	-2.59687	2.05788	2.62397e-16	4.55234e-14	P19224	PF00201.18	Cvel_30158	UDP-glucoronosyl and UDP-glucosyl transferase	GO:0043541	cellular_component
DN113271_c16_g4	Up	-2.58714	3.33896	7.05947e-20	2.03735e-17			Cvel_4758	Flocculation protein FLO11	GO:0000128	biological_process
DN111555_c0_g1	Up	-2.57772	2.78798	5.31841e-16	8.92508e-14	C7G046	PF13768.6	Cvel_15564	von Willebrand factor type A domain	GO:0004933	molecular_function
DN113043_c16_g2	Up	-2.14349	4.45281	1.14833e-14	1.66766e-12			Cvel_10623	Flocculation protein FLO11	GO:0000128	biological_process
DN97497_c1_g1	Up	-2.85662	6.8141	4.52787e-14	5.9639e-12			Cvel_30385	Glycoprotein gp2	GO:0090665	cellular_component
DN113271_c1_g1	Up	-2.21335	3.96643	1.22101e-15	1.9549e-13			Cvel_10623	Flocculation protein FLO11	GO:0000128	biological_process
DN99485_c0_g1	Up	-9.00703	-0.0156657	5.67936e-16	9.46073e-14			Cvel_21973	Myosin-A	GO:0031035	biological_process
DN105323_c0_g1	Up	-3.01464	2.54992	1.09936e-16	2.00048e-14			Cvel_10384	Extracellular serine proteinase	GO:0004867	molecular_function
DN113639_c6_g4	Up	-2.11415	6.18191	1.10082e-11	1.0056e-09			Cvel_2151	NADP-dependent glyceraldehyde-3-phosphate	GO:0047100	molecular_function
DN103312_c0_g1	Up	-2.40309	2.88951	5.34715e-16	8.94019e-14			Cvel_10514	Uromodulin	GO:0005509	molecular_function
DN15491_c0_g1	Up	-7.03002	0.871406	3.83114e-19	9.64383e-17			Cvel_3446	Copper resistance protein A homolog	GO:0043848	molecular_function
DN85357_c1_g1	Up	-2.58289	4.99432	3.7055e-14	4.92364e-12			Cvel_3494	Flocculation protein FLO11	GO:0000128	biological_process
DN111516_c25_g3	Up	-2.21173	8.26182	6.43867e-11	5.10029e-09			Cvel_30385	Glycoprotein gp2	GO:0090665	cellular_component
DN39445_c0_g1	Up	-2.07527	4.25368	3.49058e-14	5.49567e-12	Q8K097	PF01027.20	Cvel_13482	Inhibitor of apoptosis-promoting Bax1(Protein lifeguard 3)	GO:1990525	molecular_function
DN84261_c0_g1	Up	-5.14812	0.756867	1.30607e-19	3.65296e-17			Cvel_22548	Serine/threonine-protein phosphatase 6 regulatory	GO:0004722	molecular_function
DN112473_c0_g1	Up	-2.63566	3.66971	3.29731e-15	5.06445e-13			Cvel_22271	Ectoine hydroxylase	GO:0042399	biological_process
DN100806_c0_g1	Up	-3.20526	1.2894	2.72551e-17	5.45204e-15			Cvel_1381	Aldose reductase	GO:0004032	molecular_function
DN112462_c1_g1	Up	-2.23175	4.11467	4.34535e-15	6.58488e-13			Cvel_12793	Flocculation protein FLO11	GO:0000128	biological_process
DN113480_c11_g1	Up	-2.19884	3.26828	7.83845e-16	1.28681e-13			Cvel_19711	Heat shock 70 kDa protein	GO:0031072	molecular_function
DN105820_c3_g1	Up	-2.54164	3.59431	1.6788e-14	2.36967e-12			Cvel_12793	Flocculation protein FLO11	GO:0000128	biological_process
DN119911_c0_g1	Up	-3.65214	0.873063	1.04788e-17	2.2502e-15			Cvel_9271	Carbonic anhydrase	GO:0004089	molecular_function
DN131141_c4_g1	Up	-2.77735	2.22236	4.61912e-16	7.80941e-14			Cvel_11924	Cell wall protein DAN4	GO:0099613	biological_process
DN112103_c0_g1	Up	-2.02308	3.38549	1.53831e-13	1.87368e-11	Q1GR67	PF00141.23	Cvel_23495	Catalase-peroxidase 2	GO:0004096	molecular_function
DN67362_c0_g1	Up	-2.87427	4.72246	7.77923e-14	9.92893e-12			Cvel_30385	Glycoprotein gp2	GO:0090665	cellular_component
DN113639_c6_g3	Up	-2.05993	5.10316	4.16537e-12	4.03275e-10			Cvel_2151	NADP-dependent glyceraldehyde-3-phosphate	GO:0047100	molecular_function
DN105289_c1_g1	Up	-2.00884	3.3787	5.67925e-13	7.5408e-11			Cvel_6255	Probable 3'	GO:0030123	cellular_component
DN110529_c18_g1	Up	-2.35385	8.71521	4.2817e-06	0.000119167			Cvel_25596	Flocculation protein FLO11	GO:0000128	biological_process
DN112841_c1_g2	Up	-2.51583	3.3336	2.4445e-14	3.34623e-12			Cvel_15980	Prostaglandin reductase 1	GO:0036132	molecular_function
DN102387_c0_g1	Up	-6.21427	7.60296	2.74777e-08	1.32308e-06			Cvel_5727	Transmembrane 9 superfamily member 4	GO:2000307	biological_process
DN107697_c0_g1	Up	-2.57912	2.48916	1.60204e-15	2.53806e-13			Cvel_22383	Kinesin-like calmodulin-binding protein	GO:0019894	molecular_function
DN111844_c0_g1	Up	-2.72848	3.35413	1.84286e-09	1.12594e-07	Q6A152	PF00067.22	Cvel_5365	Cytochrome P450	GO:0045328	biological_process
DN113597_c18_g1	Up	-2.55538	4.63299	4.46442e-14	5.89747e-12			Cvel_25597	Cell wall protein DAN4	GO:0099613	biological_process
DN111494_c29_g1	Up	-2.80665	3.75706	1.77257e-14	2.49426e-12			Cvel_25596	Flocculation protein FLO11	GO:0000128	biological_process
DN52447_c0_g1	Up	-2.59128	2.68754	1.54412e-11	1.35589e-09			Cvel_23250	Putative acetolactate synthase large subunit IlvB2	GO:0005948	cellular_component
DN113527_c2_g2	Up	-2.0239	3.55274	3.30565e-13	3.7866e-11	P25803	PF00112.23	Cvel_30098	Peptidase_C1	GO:0006508	biological_process
DN95641_c0_g1	Up	-2.90395	1.65643	2.46964e-14	3.37046e-12			Cvel_7442	ATPase 3	GO:0015430	molecular_function
DN111402_c0_g1	Up	-3.18547	1.43741	2.37149e-12	2.38783e-10	Q81BF4	PF00667.20	Cvel_5365	Cytochrome P450	GO:0045328	biological_process
DN112776_c1_g1	Up	-3.09698	3.28482	6.47317e-14	8.404e-12			Cvel_16347	Putative quinone-oxidoreductase homolog	GO:0052755	molecular_function
DN111402_c1_g1	Up	-2.80687	1.85116	2.72168e-16	4.68894e-14			Cvel_5365	Bifunctional P-450/NADPH-P450 reductase	GO:0018541	molecular_function
DN104224_c0_g1	Up	-2.58109	1.10423	1.67333e-09	1.03154e-07		PF05368.13	Cvel_7745	NmrA-like family	GO:0009455	biological_process
DN91973_c0_g1	Up	-2.1618	1.47016	1.7192e-05	0.000388513			Cvel_23250	Putative acetolactate synthase large subunit IlvB2	GO:0005948	cellular_component
DN108306_c2_g1	Up	-2.37373	7.12093	5.80128e-11	4.65232e-09			Cvel_30385	Glycoprotein gp2	GO:0090665	cellular_component
DN108636_c0_g1	Up	-2.69288	0.957877	1.17624e-12	1.25401e-10			Cvel_1680	Protein phosphatase 1 regulatory subunit 7	GO:0034237	molecular_function
DN100356_c0_g1	Up	-7.9813	-0.936094	9.83344e-11	7.44753e-09			Cvel_7442	ATPase 3	GO:0015430	molecular_function
DN15462_c0_g1	Up	-2.83833	3.56376	2.21989e-13	2.63998e-11			Cvel_12793	Flocculation protein FLO11	GO:0000128	biological_process
DN108462_c0_g2	Up	-2.15604	3.63528	2.09133e-12	2.12462e-10	P25803	PF00112.23	Cvel_5218	Peptidase_C1	GO:0006508	biological_process
DN111573_c10_g1	Up	-2.14129	3.34403	1.85843e-12	1.9225e-10			Cvel_3494	Flocculation protein FLO11	GO:0000128	biological_process
DN86809_c0_g1	Up	-9.41438	0.375617	1.70348e-11	1.70865e-09			Cvel_2329	Probable serine acetyltransferase 4	GO:0009001	molecular_function
DN109747_c5_g1	Up	-2.55732	3.82674	3.37369e-14	4.5092e-12			Cvel_30526	Glycoprotein gp2	GO:0090665	cellular_component
DN122602_c0_g1	Up	-9.78986	0.717321	1.21333e-20	3.81777e-18			Cvel_12153	Chaperone protein dnaJ 2	GO:0061077	biological_process
DN104231_c0_g1	Up	-2.58317	2.04053	2.10914e-19	5.524e-17			Cvel_4496	Ankyrin-3	GO:0030506	molecular_function
DN113527_c2_g1	Up	-2.07704	7.63482	7.89545e-10	5.12525e-08			Cvel_30098	Fruit bromelain	GO:0009835	biological_process
DN111573_c12_g1	Up	-2.44001	6.26758	7.20199e-10	4.72515e-08			Cvel_10623	Flocculation protein FLO11	GO:0000128	biological_process
DN100128_c1_g1	Up	-2.72777	3.00078	4.90751e-14	6.44519e-12			Cvel_2522	Aggrecan core protein	GO:0033577	biological_process
DN101259_c16_g1	Up	-2.27856	8.63382	4.69089e-11	4.39615e-09			Cvel_30526	Glycoprotein gp2	GO:0090665	cellular_component
DN41930_c0_g1	Up	-3.46794	1.49911	1.82037e-21	6.59849e-19			Cvel_14827	Anthocyanidin 3-O-glucosyltransferase	GO:0047213	molecular_function
DN81309_c0_g1	Up	-8.49944	-0.478036	1.55107e-15	2.46593e-13			Cvel_3446	Copper resistance protein A homolog	GO:0043848	molecular_function
DN113486_c0_g1	Up	-2.49117	5.0614	5.65019e-11	4.53919e-09			Cvel_23252	Heme-binding protein 2	GO:0020037	molecular_function
DN113527_c2_g3	Up	-2.06923	4.96894	9.75301e-11	7.40216e-09			Cvel_30098	Fruit bromelain	GO:0009835	biological_process
DN112776_c1_g2	Up	-2.86144	1.9527	9.13047e-13	9.85004e-11	O97764	PF08240.12	Cvel_16347	Alcohol dehydrogenase GroES-like domain	GO:0043956	molecular_function
DN112556_c3_g1	Up	-2.0168	4.55207	7.50288e-11	6.77711e-09			Cvel_13971	Putative transposon Ty5-1 protein YCL074W	GO:0070893	biological_process
DN30090_c0_g1	Up	-6.4241	0.82141	1.60343e-16	2.88299e-14			Cvel_20111	Putative metal chaperone YciC	GO:0030001	biological_process
DN108462_c1_g1	Up	-2.01944	4.43975	9.84567e-11	7.44753e-09	Q9JIA9	PF00112.23	Cvel_5218	Peptidase_C1	GO:0006508	biological_process
DN110970_c1_g1	Up	-2.40362	1.56622	6.29948e-11	5.01634e-09	E9FCP5	PF00067.22	Cvel_26699	Cytochrome P450	GO:0045328	biological_process
DN94003_c0_g1	Up	-2.26994	2.21445	1.42752e-14	2.05337e-12			Cvel_9695	Flavin reductase (NADPH)	GO:0036382	molecular_function
DN116814_c1_g1	Up	-4.06204	0.337243	2.42104e-13	2.8567e-11			Cvel_13896	Putative ankyrin repeat protein RF_0381	GO:0071532	molecular_function
DN30230_c0_g1	Up	-2.14489	1.85082	3.97053e-11	3.271e-09			Cvel_31900	Multiple epidermal growth factor-like domains	GO:0048408	molecular_function
DN50005_c0_g1	Up	-6.30471	-0.570294	1.82733e-10	1.51594e-08			Cvel_16566	Succinate dehydrogenase [ubiquinone] flavoprotein	GO:0008177	molecular_function
DN128172_c0_g1	Up	-2.29902	1.05164	1.31173e-09	8.22057e-08			Cvel_12793	Flocculation protein FLO11	GO:0000128	biological_process
DN111756_c0_g1	Up	-2.99281	2.58827	4.42267e-20	1.31836e-17			Cvel_26481	Heme-binding-like protein At3g10130	GO:0042988	molecular_function
DN133310_c0_g1	Up	-4.48936	0.334539	9.19625e-17	1.69383e-14			Cvel_20009	Indole-3-acetic acid-amido synthetase GH3.17	GO:0010279	molecular_function
DN76905_c0_g1	Up	-9.25018	0.209883	1.2907e-19	3.6324e-17			Cvel_21973	Myosin-A	GO:0031035	biological_process
DN108715_c1_g1	Up	-2.03397	3.7458	7.82231e-11	6.0794e-09	P80884	PF08246.12	Cvel_30098	Cathepsin propeptide inhibitor domain (I29)	GO:1990525	molecular_function
DN97551_c0_g1	Up	-2.66088	2.67679	2.93969e-12	2.921e-10	Q67YE6	PF01428.16	Cvel_20589	AN1-like Zinc finger	GO:0071535	molecular_function
DN17302_c0_g1	Up	-2.50193	7.31969	7.40045e-10	4.83162e-08			Cvel_30526	Glycoprotein gp2	GO:0090665	cellular_component
DN94503_c9_g1	Up	-2.52675	7.14461	1.1635e-08	6.12288e-07			Cvel_14055	Flocculation protein FLO11	GO:0000128	biological_process
DN99350_c0_g1	Up	-9.16298	0.129322	3.34281e-18	7.49816e-16			Cvel_3446	Copper resistance protein A homolog	GO:0043848	molecular_function
DN99189_c0_g1	Up	-2.35734	2.64606	9.34919e-11	7.10758e-09			Cvel_12793	Flocculation protein FLO11	GO:0000128	biological_process
DN110990_c0_g1	Up	-2.77923	2.66375	5.30965e-10	4.04217e-08	P46416	PF03917.17	Cvel_15458	Eukaryotic glutathione synthase	GO:0036087	cellular_component
DN45652_c0_g1	Up	-8.69616	-0.299066	1.33593e-14	1.9339e-12			Cvel_9271	Carbonic anhydrase	GO:0004089	molecular_function
DN109781_c0_g2	Up	-8.03984	-0.879613	6.29807e-10	4.75196e-08			Cvel_11393	Glutathionyl-hydroquinone reductase YqjG	GO:1902314	molecular_function
DN113486_c0_g2	Up	-2.50969	6.15051	3.09959e-10	2.16398e-08			Cvel_23252	Heme-binding protein 2	GO:0020037	molecular_function
DN82587_c0_g1	Up	-2.85393	0.252878	4.90338e-07	1.7563e-05			Cvel_30469	Tetracycline resistance protein	GO:0015904	biological_process
DN101259_c16_g3	Up	-2.4438	10.246	2.04057e-07	8.00505e-06			Cvel_14055	Flocculation protein FLO11	GO:0000128	biological_process
DN131141_c8_g1	Up	-2.37206	12.1252	1.35239e-09	8.42869e-08			Cvel_11924	Cell wall protein DAN4	GO:0099613	biological_process
DN110970_c0_g1	Up	-2.55344	1.42865	1.3675e-10	1.01079e-08	Q9HCS2	PF00067.22	Cvel_26699	Cytochrome P450	GO:0045328	biological_process
DN115639_c0_g1	Up	-3.12257	0.578982	1.13561e-11	1.0353e-09			Cvel_12879	D-galactoside-specific lectin	GO:0016936	molecular_function
DN85017_c0_g1	Up	-9.19568	0.159097	5.28622e-20	1.55532e-17			Cvel_3446	Copper resistance protein A homolog	GO:0043848	molecular_function
DN70325_c0_g1	Up	-8.08078	-0.842702	1.23156e-09	8.6625e-08			Cvel_16493	(R)-mandelonitrile lyase 2	GO:0046593	molecular_function
DN59944_c0_g1	Up	-2.73178	0.0621625	3.22748e-08	1.51698e-06			Cvel_23579	Probable zinc transporter 12	GO:0005385	molecular_function
DN101312_c0_g1	Up	-2.81245	0.987061	3.89705e-13	4.38152e-11			Cvel_11720	Alpha-protein kinase vwkA	GO:0035866	cellular_component
DN101259_c18_g1	Up	-2.48107	6.33247	3.05401e-09	1.79477e-07			Cvel_14055	Flocculation protein FLO11	GO:0000128	biological_process
DN123534_c0_g1	Up	-2.71577	1.22789	1.2768e-10	9.48871e-09	Q86KC7		Cvel_18790	Four-domain proteases inhibitor	GO:1990525	molecular_function
DN113597_c37_g1	Up	-2.36858	11.1142	6.66332e-09	3.71359e-07			Cvel_25597	Cell wall protein DAN4	GO:0099613	biological_process
DN112776_c0_g1	Up	-2.67391	0.504536	1.24235e-08	6.51515e-07	Q0VC50	PF00107.26	Cvel_16347	Putative quinone-oxidoreductase homolog	GO:0052755	molecular_function
DN86442_c1_g1	Up	-2.84327	2.96584	8.26845e-11	6.38234e-09			Cvel_12793	Flocculation protein FLO11	GO:0000128	biological_process
DN20133_c0_g1	Up	-2.14741	2.4709	1.58376e-08	8.15459e-07			Cvel_19711	Heat shock 70 kDa protein	GO:0031072	molecular_function
DN100806_c0_g2	Up	-2.95123	0.949611	1.86682e-12	1.92678e-10			Cvel_1381	Aldose reductase	GO:0004032	molecular_function
DN59348_c0_g1	Up	-5.746	-0.267866	2.94931e-09	1.94532e-07			Cvel_13557	Regulator of telomere elongation helicase 1 homolog	GO:0003711	molecular_function
DN87505_c8_g1	Up	-2.56523	6.688	3.64502e-09	2.12434e-07			Cvel_11924	Cell wall protein DAN4	GO:0099613	biological_process
DN90774_c0_g1	Up	-3.83615	1.34774	1.97772e-12	2.02281e-10			Cvel_27385	Putative transporter arsB	GO:0000408	cellular_component
DN84072_c0_g1	Up	-2.84436	0.602272	4.24436e-10	2.91382e-08			Cvel_7747	Gamma-glutamyl hydrolase	GO:0034722	molecular_function
DN3405_c0_g1	Up	-4.55503	1.07596	1.87419e-12	1.92999e-10			Cvel_5603	Myosin-B/C	GO:0031035	biological_process
DN84518_c0_g1	Up	-2.66032	0.711381	1.27485e-10	9.48871e-09			Cvel_28590	Pentachlorophenol 4-monooxygenase	GO:0018677	molecular_function
DN113597_c34_g1	Up	-2.56146	4.58523	8.11501e-09	4.43001e-07			Cvel_25597	Cell wall protein DAN4	GO:0099613	biological_process
DN109937_c0_g1	Up	-2.00699	1.5848	9.98628e-09	5.31702e-07	P24203	PF02492.19	Cvel_16971	Cobalamin synthesis protein cobW C-terminal domain	GO:0018166	biological_process
DN113597_c40_g1	Up	-2.48459	5.61362	5.83047e-09	3.2858e-07			Cvel_25597	Cell wall protein DAN4	GO:0099613	biological_process
DN112851_c1_g1	Up	-2.69189	5.27814	1.72514e-07	6.90515e-06			Cvel_17055	Protein NdvB	GO:0017038	biological_process
DN90907_c0_g1	Up	-2.13788	2.36166	5.96105e-10	3.97784e-08		PF07683.14	Cvel_9128	Cobalamin synthesis protein cobW C-terminal domain	GO:0018166	biological_process
DN111494_c28_g1	Up	-2.40096	4.90889	4.0595e-09	2.34313e-07			Cvel_11924	Cell wall protein DAN4	GO:0099613	biological_process
DN106805_c0_g1	Up	-10.1831	1.10668	1.43515e-08	8.2096e-07			Cvel_17886	Aspartic proteinase-like protein 2	GO:0031873	molecular_function
DN55873_c0_g1	Up	-2.32742	3.1189	4.53794e-12	4.37477e-10			Cvel_1680	Protein phosphatase 1 regulatory subunit 7	GO:0034237	molecular_function
DN101259_c21_g1	Up	-2.03004	5.25313	1.95669e-08	9.87281e-07			Cvel_14055	Flocculation protein FLO11	GO:0000128	biological_process
DN91261_c0_g1	Up	-2.87353	1.9609	1.42945e-12	1.50275e-10			Cvel_13261	Putative serine esterase Mb1866c	GO:0016788	molecular_function
DN81254_c1_g1	Up	-2.37253	7.8702	2.93213e-08	1.39379e-06			Cvel_14055	Flocculation protein FLO11	GO:0000128	biological_process
DN113597_c33_g1	Up	-2.86699	5.13758	6.7346e-09	3.74411e-07			Cvel_25597	Cell wall protein DAN4	GO:0099613	biological_process
DN114943_c0_g1	Up	-5.95308	-0.19224	3.9403e-12	3.83122e-10			Cvel_8196	Alkaline phosphatase	GO:0004035	molecular_function
DN56798_c0_g1	Up	-3.15088	0.822531	3.22773e-12	3.17242e-10			Cvel_30158	UDP-glucuronosyltransferase 1-6	GO:0018715	molecular_function
DN92118_c0_g1	Up	-2.86061	0.423097	7.27869e-10	4.75898e-08			Cvel_2338	DNA-directed RNA polymerase II subunit RPB1	GO:0016591	cellular_component
DN92107_c0_g1	Up	-2.42453	1.02337	2.47559e-08	1.20612e-06			Cvel_12298	Leucine-rich repeat-containing protein 34	GO:0035872	biological_process
DN106864_c0_g1	Up	-3.81606	2.83649	1.77751e-23	7.67036e-21			Cvel_17055	Protein NdvB	GO:0017038	biological_process
DN111679_c0_g1	Up	-2.53818	2.81047	3.84472e-09	2.23053e-07			Cvel_8196	Alkaline phosphatase	GO:0004035	molecular_function
DN94525_c0_g1	Up	-2.18667	0.991972	7.59473e-09	4.17618e-07			Cvel_15140	Uncharacterized protein DDB_G0274171	GO:0004035	molecular_function
DN101259_c16_g2	Up	-2.53662	7.35804	1.37484e-06	4.41801e-05		PF01823.19	Cvel_16732	MAC/Perforin domain	GO:0035944	biological_process
DN88663_c0_g1	Up	-2.56824	4.66584	5.86954e-08	2.5997e-06	O45903		Cvel_17143	Trans-2-enoyl-CoA reductase	GO:0050343	molecular_function
DN101259_c17_g1	Up	-2.59003	7.07638	3.748e-08	1.7382e-06			Cvel_14055	Flocculation protein FLO11	GO:0000128	biological_process
DN113597_c8_g1	Up	-2.44293	5.71606	3.8424e-08	1.7693e-06			Cvel_16050	Serine/threonine-protein phosphatase 2A 65 kDa	GO:0004722	molecular_function
DN87209_c0_g1	Up	-2.49006	0.606146	1.01181e-10	7.64087e-09			Cvel_14055	Flocculation protein FLO11	GO:0000128	biological_process
DN113597_c41_g1	Up	-2.49823	5.39713	2.8835e-08	1.37673e-06			Cvel_25597	Cell wall protein DAN4	GO:0099613	biological_process
DN87209_c0_g1	Up	-2.50082	0.261746	6.85203e-08	3.42292e-06			Cvel_21047	Fibrillin-2	GO:0001527	cellular_component
DN113597_c41_g1	Up	-2.49655	4.77344	7.08924e-08	3.53101e-06			Cvel_25597	Cell wall protein DAN4	GO:0099613	biological_process
DN10774_c0_g1	Up	-2.23775	2.25987	7.34974e-08	3.65004e-06			Cvel_22694	Indoleacetamide hydrolase	GO:0043864	molecular_function
DN76269_c0_g1	Up	-2.51162	1.68156	9.25958e-09	4.95338e-07			Cvel_12841	Alpha-protein kinase vwkA	GO:0035866	cellular_component
DN102968_c0_g2	Up	-2.66637	6.60489	6.20529e-08	2.74037e-06			Cvel_14055	Flocculation protein FLO11	GO:0000128	biological_process
DN112328_c0_g1	Up	-8.87249	-0.12876	9.41357e-08	4.55921e-06	P26302	PF00485.18	Cvel_14585	Phosphoribulokinase / Uridine kinase family	GO:0004849	molecular_function
DN119627_c1_g1	Up	-2.37538	5.03881	4.68751e-08	2.12604e-06			Cvel_25596	Flocculation protein FLO11	GO:0000128	biological_process
DN57304_c0_g1	Up	-2.48469	2.36579	3.26097e-10	2.26617e-08			Cvel_31900	Multiple epidermal growth factor-like domains	GO:0048408	molecular_function
DN113597_c46_g1	Up	-2.40084	3.80476	8.5799e-09	4.6589e-07			Cvel_25597	Cell wall protein DAN4	GO:0099613	biological_process
DN82081_c0_g1	Up	-2.64006	-0.107221	7.32678e-07	2.50405e-05			Cvel_3232	Alpha-N-acetylgalactosamine-specific lectin	GO:0046871	molecular_function
DN113639_c6_g1	Up	-2.07344	2.9864	1.99002e-08	1.00187e-06	B1JYT5	PF00171.22	Cvel_2151	NADP-dependent glyceraldehyde-3-phosphate	GO:0047100	molecular_function
DN59142_c0_g1	Up	-2.54035	1.17182	3.78969e-05	0.000763498			Cvel_6160	MORN repeat-containing protein 3	GO:1990713	cellular_component
DN126574_c0_g1	Up	-2.47065	0.543142	3.56827e-10	2.46837e-08			Cvel_3612	Serine/threonine-protein kinase Nek1	GO:0004674	molecular_function
DN85292_c0_g1	Up	-2.8849	0.859279	1.26425e-08	6.61469e-07		PF01569.21	Cvel_24026	PAP2 superfamily	GO:0032813	molecular_function
DN99014_c0_g1	Up	-4.03011	-0.729008	2.5684e-08	1.24731e-06	P86179	PF02140.18	Cvel_12879	D-galactoside-specific lectin	GO:0016936	molecular_function
DN111494_c4_g1	Up	-2.20815	3.17059	7.24886e-09	4.00544e-07			Cvel_25596	Flocculation protein FLO11	GO:0000128	biological_process
DN89080_c0_g1	Up	-2.78284	0.0799911	8.38879e-09	4.56298e-07			Cvel_1400	Chaperone protein ClpB1	GO:0061077	biological_process
DN99597_c0_g1	Up	-4.99955	-0.414455	2.44677e-07	1.08671e-05	O14121		Cvel_12889	Probable NADH dehydrogenase	GO:0031679	molecular_function
DN113597_c42_g1	Up	-2.31361	5.51068	1.43037e-07	5.84929e-06			Cvel_25597	Cell wall protein DAN4	GO:0099613	biological_process
DN111494_c23_g1	Up	-2.03902	9.45839	2.64476e-07	1.16751e-05			Cvel_25597	Cell wall protein DAN4	GO:0099613	biological_process
DN104779_c0_g1	Up	-3.80401	0.756581	2.08763e-14	2.91048e-12	Q9M2A0		Cvel_7442	ATPase 3	GO:0015430	molecular_function
DN108636_c1_g1	Up	-8.76549	-0.224495	3.01044e-07	1.31523e-05			Cvel_1680	Protein phosphatase 1 regulatory subunit 7	GO:0034237	molecular_function
DN112081_c0_g1	Up	-3.32436	-0.0470963	2.74741e-08	1.32308e-06			Cvel_17055	Protein NdvB	GO:0017038	biological_process
DN30633_c0_g1	Up	-6.44787	-0.497066	1.51711e-10	1.11591e-08			Cvel_21945	COBW domain-containing protein DDB_G0274527	GO:0043849	molecular_function
DN98427_c29_g1	Up	-2.38559	8.47957	1.22406e-05	0.000292521			Cvel_25597	Cell wall protein DAN4	GO:0099613	biological_process
DN21567_c0_g1	Up	-4.90037	0.119917	1.59642e-11	1.3964e-09	Q9UW12	PF03097.18	Cvel_10517	ALG-2 interacting protein X	GO:0000408	cellular_component
DN21567_c0_g1	Up	-4.89053	-0.709697	3.65004e-07	1.54941e-05			Cvel_27385	Putative transporter arsB	GO:0000408	cellular_component
DN2212_c0_g1	Up	-2.81663	2.24242	1.02519e-08	5.44562e-07			Cvel_12793	Flocculation protein FLO11	GO:0000128	biological_process
DN74361_c11_g1	Up	-2.34853	7.98771	4.1139e-07	1.72757e-05			Cvel_25597	Cell wall protein DAN4	GO:0099613	biological_process
DN110529_c18_g3	Up	-2.06474	6.13874	4.39417e-07	1.83165e-05			Cvel_25419	Mucin-5AC (Fragments)	GO:0098594	cellular_component
DN101259_c22_g1	Up	-2.23009	2.68551	1.3003e-08	6.78764e-07			Cvel_14055	Flocculation protein FLO11	GO:0000128	biological_process
DN75326_c0_g1	Up	-2.38835	0.428664	1.44508e-07	5.89348e-06			Cvel_8527	Putative ammonium transporter 1	GO:0008519	molecular_function
DN68600_c0_g1	Up	-2.71265	-0.33316	4.70995e-07	1.69506e-05			Cvel_10865	Ankyrin-2	GO:0030506	molecular_function
DN113271_c15_g1	Up	-2.2283	3.64861	2.41433e-08	1.18053e-06			Cvel_12793	Flocculation protein FLO11	GO:0000128	biological_process
DN75602_c0_g1	Up	-2.08956	7.38095	6.97806e-07	2.39527e-05			Cvel_25597	Cell wall protein DAN4	GO:0099613	biological_process
DN103501_c7_g1	Up	-2.36445	8.62136	1.42957e-06	4.56797e-05			Cvel_25596	Flocculation protein FLO11	GO:0000128	biological_process
DN54877_c0_g1	Up	-2.99823	0.272613	8.88679e-09	4.78219e-07			Cvel_15564	von Willebrand factor A domain-containing protein	GO:0061644	biological_process
DN131846_c0_g1	Up	-3.77089	2.16826	5.52671e-07	1.94573e-05			Cvel_27385	Putative transporter arsB	GO:0000408	cellular_component
DN91331_c0_g1	Up	-2.43158	-0.623941	3.5832e-05	0.00072577			Cvel_12879	D-galactoside-specific lectin	GO:0016936	molecular_function
DN115429_c0_g1	Up	-2.76276	0.866173	3.77018e-08	1.74136e-06			Cvel_6160	MORN repeat-containing protein 3	GO:1990713	cellular_component
DN66863_c0_g1	Up	-3.1736	1.60872	1.13715e-12	1.2152e-10			Cvel_17143	Trans-2-enoyl-CoA reductase	GO:0050343	molecular_function
DN77130_c0_g1	Up	-4.65374	5.88213	1.66765e-07	6.68682e-06			Cvel_21343	Eukaryotic translation initiation factor 2D	GO:1990500	cellular_component
DN98255_c0_g1	Up	-2.87038	2.41946	3.96152e-17	7.77042e-15			Cvel_23250	Putative acetolactate synthase large subunit IlvB2	GO:0005948	cellular_component
DN50070_c0_g1	Up	-3.08391	2.40435	1.16402e-07	4.85204e-06			Cvel_5365	Bifunctional P-450/NADPH-P450 reductase	GO:0018541	molecular_function
DN98427_c34_g1	Up	-2.13392	1.99514	4.72238e-08	2.13971e-06			Cvel_25597	Cell wall protein DAN4	GO:0099613	biological_process
DN105876_c0_g1	Up	-2.89394	0.606204	1.40598e-06	5.14018e-05	Q9SR77	PF04832.12	Cvel_26481	SOUL heme-binding protein	GO:0020037	molecular_function
DN64369_c0_g1	Up	-4.62978	0.422335	5.61817e-10	3.77125e-08			Cvel_3598	Ubiquitin fusion degradation protein 1 homolog	GO:0043848	molecular_function
DN19984_c0_g1	Up	-3.95974	-0.243342	2.7958e-10	1.964e-08			Cvel_12458	Peroxisomal adenine nucleotide carrier 2	GO:0005471	molecular_function
DN99930_c0_g1	Up	-2.28857	2.80836	2.13837e-08	1.06824e-06			Cvel_26699	Cytochrome P450 97B2	GO:0045328	biological_process
DN84120_c0_g1	Up	-2.34234	1.07692	3.57823e-08	1.668e-06		PF01823.19	Cvel_16732	MAC/Perforin domain	GO:0035944	biological_process
DN111494_c2_g1	Up	-2.37734	1.80596	2.27415e-09	1.37024e-07			Cvel_25596	Flocculation protein FLO11	GO:0000128	biological_process
DN63627_c0_g1	Up	-2.12994	0.70012	3.70263e-07	1.37513e-05			Cvel_9131	Putative metal chaperone YciC	GO:0030001	biological_process
DN109925_c0_g1	Up	-2.20583	-0.287774	1.00488e-05	0.000247585	Q6P6R0	PF01027.20	Cvel_28539	Inhibitor of apoptosis-promoting Bax1(Protein lifeguard 3)	GO:1990525	molecular_function
DN12940_c0_g1	Up	-2.78186	0.563112	1.22511e-07	5.09733e-06		PF14295.6	Cvel_19999	Fibrillin-1	GO:0001527	cellular_component
DN131288_c4_g1	Up	-2.25321	9.41894	1.3954e-06	4.47138e-05			Cvel_25597	Cell wall protein DAN4	GO:0099613	biological_process
DN85051_c0_g1	Up	-2.21472	7.05358	1.38991e-06	4.46011e-05			Cvel_25597	Cell wall protein DAN4	GO:0099613	biological_process
DN113271_c18_g1	Up	-2.92708	3.60359	4.41531e-07	1.59409e-05			Cvel_14055	Flocculation protein FLO11	GO:0000128	biological_process
DN28164_c1_g1	Up	-2.26525	9.72833	3.02845e-06	8.81305e-05			Cvel_25597	Cell wall protein DAN4	GO:0099613	biological_process
DN67332_c0_g1	Up	-2.67334	2.58204	9.84592e-08	4.17323e-06			Cvel_14055	Flocculation protein FLO11	GO:0000128	biological_process
DN132917_c0_g1	Up	-5.16747	-0.482585	8.60481e-08	3.71672e-06			Cvel_21973	Myosin-A	GO:0031035	biological_process
DN81826_c0_g1	Up	-4.19826	0.576084	2.18311e-08	1.08342e-06			Cvel_8812	Serine/arginine repetitive matrix protein 1	GO:0039660	molecular_function
DN15626_c0_g1	Up	-6.02636	6.30379	8.56677e-07	2.8881e-05	Q6CI08		Cvel_20000	Eukaryotic translation initiation factor 3 subunit	GO:0005852	cellular_component
DN59173_c0_g1	Up	-2.03152	1.41509	3.95869e-09	2.28786e-07			Cvel_12350	Tyrosinase	GO:0050371	molecular_function
DN99634_c0_g1	Up	-3.72592	-0.416497	4.91982e-08	2.21808e-06			Cvel_8392	D-alanyl-D-alanine carboxypeptidase	GO:0009002	molecular_function
DN67171_c0_g1	Up	-3.61055	-0.431794	2.3112e-08	1.1358e-06			Cvel_21272	Uncharacterized protein Rv1288/MT1326	GO:0017038	biological_process
DN72064_c0_g1	Up	-2.97013	0.0559406	3.75208e-08	1.73831e-06			Cvel_5201	Surfactin synthase subunit 1	GO:0061579	molecular_function
DN17740_c0_g1	Up	-2.65411	0.945264	1.56222e-07	6.30876e-06			Cvel_1570	Zinc finger protein 571	GO:0070742	molecular_function
DN113296_c2_g1	Up	-2.06339	0.789793	6.70862e-06	0.000206452			Cvel_36597	Craniofacial development protein 2	GO:1904888	biological_process
DN94503_c5_g1	Up	-2.24114	9.71554	4.41018e-06	0.000122143			Cvel_25597	Cell wall protein DAN4	GO:0099613	biological_process
DN80818_c0_g1	Up	-2.43497	7.32927	4.01497e-06	0.000112993			Cvel_25596	Flocculation protein FLO11	GO:0000128	biological_process
DN23387_c0_g1	Up	-2.35379	5.50273	3.65155e-06	0.000104386			Cvel_25596	Flocculation protein FLO11	GO:0000128	biological_process
DN103000_c0_g1	Up	-2.10714	0.505101	2.55031e-07	9.80108e-06			Cvel_31900	Multiple epidermal growth factor-like domains	GO:0048408	molecular_function
DN110022_c0_g1	Up	-2.28504	0.655101	8.91684e-06	0.000264252			Cvel_19364	Calcium-transporting ATPase 3	GO:0005388	molecular_function
DN54235_c0_g1	Up	-5.16715	0.0950533	1.68512e-07	6.75091e-06			Cvel_1303	Callose synthase 3	GO:0003856	molecular_function
DN4164_c0_g1	Up	-2.13199	0.306124	3.11346e-07	1.1722e-05			Cvel_31900	Multiple epidermal growth factor-like domains	GO:0048408	molecular_function
DN58459_c0_g1	Up	-6.79481	7.73009	4.92233e-07	1.7617e-05			Cvel_26884	Polyubiquitin-B	GO:1990450	molecular_function
DN99314_c2_g1	Up	-2.53693	6.73145	5.4404e-06	0.00014612			Cvel_14055	Flocculation protein FLO11	GO:0000128	biological_process
DN75769_c0_g1	Up	-2.46452	1.22583	1.64654e-07	6.61391e-06			Cvel_655	GTP-binding protein TypA/BipA homolog	GO:0030742	molecular_function
DN103846_c0_g1	Up	-2.12162	1.67828	5.32139e-09	3.02146e-07			Cvel_16971	COBW domain-containing protein 1	GO:0070427	biological_process
DN41360_c0_g1	Up	-4.91268	-0.622304	1.2087e-05	0.000339597			Cvel_2515	Sialidase	GO:0052798	molecular_function
DN110902_c0_g1	Up	-2.34032	1.8731	1.30373e-05	0.000361111			Cvel_13473	RNA-editing ligase 2	GO:0009451	biological_process
DN98427_c39_g1	Up	-2.4495	6.31943	7.20983e-06	0.000186141			Cvel_25597	Cell wall protein DAN4	GO:0099613	biological_process
DN72398_c0_g1	Up	-8.79481	7.12589	3.90666e-06	0.000110563			Cvel_17427	Methylenetetrahydrofolate reductase 1	GO:0033738	molecular_function
DN98427_c28_g1	Up	-2.47379	9.28763	9.82003e-06	0.000242477			Cvel_25419	Mucin-5AC (Fragments)	GO:0098594	cellular_component
DN7632_c0_g1	Up	-3.57868	0.56674	4.35732e-08	1.98223e-06			Cvel_12615	Kynurenine 3-monooxygenase	GO:0004502	molecular_function
DN37529_c1_g1	Up	-3.17716	-0.424707	2.97789e-06	8.68264e-05			Cvel_29221	Ankyrin repeat and SOCS box protein 2	GO:0071532	molecular_function
DN81693_c0_g1	Up	-2.53202	1.16932	5.38715e-08	2.40959e-06			Cvel_32094	(S)-2-haloacid dehalogenase H-109	GO:0018784	molecular_function
DN101259_c12_g1	Up	-2.38984	5.79808	1.05751e-05	0.000258865			Cvel_14055	Flocculation protein FLO11	GO:0000128	biological_process
DN98427_c28_g2	Up	-2.47699	8.93372	9.46886e-06	0.000234701			Cvel_25597	Cell wall protein DAN4	GO:0099613	biological_process
DN15316_c0_g1	Up	-2.50448	0.712573	2.52645e-09	1.50843e-07			Cvel_22271	Ectoine hydroxylase	GO:0042399	biological_process
DN83839_c0_g1	Up	-2.36108	0.00947561	2.63822e-05	0.000654108			Cvel_2120	Uncharacterized protein C17A5.05c	GO:0017038	biological_process
DN27366_c0_g1	Up	-2.00468	6.15826	2.22411e-05	0.000484442			Cvel_25597	Cell wall protein DAN4	GO:0099613	biological_process
DN107621_c0_g1	Up	-2.73978	0.200338	2.92762e-05	0.000711669	P08594		Cvel_10384	Extracellular serine proteinase	GO:0004867	molecular_function
DN105301_c0_g1	Up	-7.82649	-1.05859	2.95711e-05	0.000717123			Cvel_6979	La-related protein 4	GO:0030289	cellular_component
DN98165_c0_g1	Up	-2.85886	-0.121801	1.6697e-06	5.26472e-05			Cvel_12350	Tyrosinase	GO:0050371	molecular_function
DN98427_c33_g1	Up	-2.7672	2.25136	2.24048e-06	6.75872e-05			Cvel_25596	Flocculation protein FLO11	GO:0000128	biological_process
DN101454_c0_g1	Up	-2.57437	1.05912	2.52131e-10	1.7906e-08			Cvel_16731	Probable U3 small nucleolar RNA-associated protein	GO:0005732	cellular_component
DN86664_c0_g1	Up	-2.08905	7.35985	2.31296e-05	0.000499524			Cvel_25597	Cell wall protein DAN4	GO:0099613	biological_process
DN95905_c1_g1	Up	-2.89619	-0.386734	3.84201e-07	1.42107e-05			Cvel_18790	Four-domain proteases inhibitor	GO:1990525	molecular_function
DN94725_c0_g1	Up	-2.15679	0.331913	6.9469e-07	2.38638e-05			Cvel_16545	Postreplication repair E3 ubiquitin-protein ligase	GO:0044695	cellular_component
DN96560_c3_g1	Up	-2.03224	2.70255	1.98018e-06	6.08286e-05			Cvel_25596	Flocculation protein FLO11	GO:0000128	biological_process
DN108296_c0_g1	Up	-2.59159	0.330194	2.53176e-05	0.000540085	P27868	PF00205.22	Cvel_19529	Acetolactate synthase	GO:0005948	cellular_component
DN20423_c0_g1	Up	-2.41729	2.12313	1.5168e-06	4.8195e-05			Cvel_6160	MORN repeat-containing protein 3	GO:1990713	cellular_component
DN13373_c0_g1	Up	-2.4633	0.228378	1.23963e-08	6.5084e-07			Cvel_23245	Pyruvate decarboxylase	GO:0004737	molecular_function
DN113480_c14_g1	Up	-2.25252	1.73341	5.45871e-07	1.92628e-05			Cvel_19711	Heat shock 70 kDa protein	GO:0031072	molecular_function
DN113629_c11_g1	Up	-3.57825	1.34291	4.0142e-05	0.000931713			Cvel_13026	60S ribosomal protein L4	GO:0000027	biological_process
DN113058_c0_g1	Up	-9.34305	0.310628	1.01137e-09	7.23381e-08	O96269			40S ribosomal protein S30	GO:0000028	biological_process
DN103810_c0_g1	Up	-2.15343	1.46159	2.14192e-08	1.06884e-06	O34539		Cvel_13283	UDP-glucosyltransferase YjiC	GO:0035251	molecular_function
DN108989_c3_g1	Down	11.6311	2.50066	5.35509e-54	3.49701e-50			Cvel_11646	hypothetical protein
DN112684_c0_g2	Down	10.6938	1.56959	7.88294e-36	1.33626e-32			Cvel_29494	hypothetical protein
DN105630_c0_g1	Down	9.53215	0.421671	4.19406e-18	1.18491e-15			Cvel_11113	hypothetical protein
DN110706_c0_g1	Down	8.92885	-0.160015	3.14406e-14	4.99651e-12			Cvel_23103	hypothetical protein
DN83885_c1_g1	Down	8.45041	-0.612842	2.0348e-12	2.49947e-10			Cvel_20562	hypothetical protein
DN112209_c1_g1	Down	8.33739	-0.723871	1.3985e-10	1.18282e-08			Cvel_4397	hypothetical protein
DN102664_c0_g1	Down	8.52785	-0.560957	1.73952e-09	1.1922e-07			Cvel_7758	hypothetical protein
DN118786_c0_g1	Down	4.24037	0.515516	2.90473e-13	3.3747e-11			Cvel_3444	hypothetical protein
DN107405_c1_g1	Down	9.5454	0.408994	8.17704e-09	4.89794e-07			Cvel_27142	hypothetical protein
DN77744_c0_g1	Down	3.13308	1.59458	2.14899e-12	2.17832e-10			Cvel_20219	hypothetical protein
DN113399_c0_g1	Down	2.17756	3.48888	1.88845e-08	1.06211e-06			Cvel_15973	hypothetical protein
DN113468_c2_g2	Down	2.2277	2.53606	2.37974e-08	1.30409e-06			Cvel_19100	hypothetical protein
DN106902_c0_g1	Down	2.50112	0.267246	2.85309e-09	1.68544e-07			Cvel_1210	hypothetical protein
DN120328_c0_g1	Down	2.49889	0.57768	2.19078e-08	1.08604e-06			Cvel_13043	hypothetical protein
DN102391_c0_g1	Down	8.32214	6.93533	7.69923e-09	4.22851e-07			Cvel_171	hypothetical protein
DN93676_c0_g1	Down	4.2267	0.750804	1.1326e-09	7.17737e-08			Cvel_21727	hypothetical protein
DN101994_c0_g1	Down	6.43876	4.03731	1.50972e-07	7.05654e-06			Cvel_24056	hypothetical protein
DN57517_c0_g1	Down	8.58942	-0.467409	1.57333e-07	7.31352e-06			Cvel_22841	hypothetical protein
DN111675_c0_g1	Down	8.39471	-0.695465	1.83726e-07	8.39463e-06			Cvel_14163	hypothetical protein
DN109355_c0_g1	Down	3.76099	-0.364003	2.31235e-07	1.03697e-05			Cvel_13537	hypothetical protein
DN109533_c7_g1	Down	2.18513	1.16467	2.60435e-07	1.15167e-05			Cvel_26970	hypothetical protein
DN51792_c0_g1	Down	5.91957	-0.615242	2.75743e-07	1.21198e-05			Cvel_24075	hypothetical protein
DN111134_c0_g1	Down	6.81825	6.66758	6.92297e-08	3.02943e-06			Cvel_25934	hypothetical protein
DN111897_c0_g1	Down	3.02461	-0.390031	4.28845e-07	1.7909e-05			Cvel_23889	hypothetical protein
DN88961_c0_g1	Down	4.37446	0.256488	1.50099e-10	1.10585e-08			Cvel_3590	hypothetical protein
DN109072_c0_g1	Down	2.14271	3.44293	7.8864e-07	3.08504e-05			Cvel_3513	hypothetical protein
DN7402_c0_g1	Down	2.30333	0.48786	8.76947e-07	3.39135e-05			Cvel_1715	hypothetical protein
DN89903_c0_g1	Down	3.24864	0.588253	1.41336e-08	7.32718e-07			Cvel_21442	hypothetical protein
DN85817_c0_g1	Down	2.66392	0.196154	1.5464e-07	6.25601e-06			Cvel_4046	hypothetical protein
DN58034_c0_g1	Down	2.24664	1.10205	6.19588e-09	3.47876e-07			Cvel_26616	hypothetical protein
DN123258_c0_g1	Down	3.27702	0.0529467	4.67695e-10	3.17729e-08			Cvel_15260	hypothetical protein
DN108051_c0_g1	Down	3.66809	0.14556	6.50095e-11	5.13167e-09			Cvel_1118	hypothetical protein
DN11269_c0_g1	Down	3.61491	-0.498081	1.45918e-06	5.30414e-05			Cvel_20058	hypothetical protein
DN92839_c0_g1	Down	3.95994	5.50829	1.55857e-05	0.000357656			Cvel_12939	hypothetical protein
DN17533_c0_g1	Down	3.62732	0.438243	3.49449e-11	2.89992e-09			Cvel_8397	hypothetical protein
DN98672_c0_g1	Down	2.54239	0.789792	1.82095e-06	6.44418e-05			Cvel_19704	hypothetical protein
DN105340_c0_g1	Down	2.18243	0.130867	1.46307e-06	4.66514e-05			Cvel_21033	hypothetical protein
DN108635_c0_g1	Down	2.82705	2.32403	2.76794e-06	9.3778e-05			Cvel_4900	hypothetical protein
DN98656_c0_g1	Down	2.32619	0.251398	5.42957e-07	1.91749e-05			Cvel_17583	hypothetical protein
DN84555_c0_g1	Down	2.9645	-0.0785218	2.75071e-06	8.09316e-05			Cvel_19272	hypothetical protein
DN120523_c0_g1	Down	2.24464	1.10096	9.39424e-08	3.99674e-06			Cvel_19717.t3	hypothetical protein
DN111834_c0_g1	Down	5.22416	-0.441382	6.24438e-06	0.000194201			Cvel_11599	hypothetical protein
DN125925_c0_g1	Down	2.2238	0.732585	3.11483e-07	1.1722e-05			Cvel_15972	hypothetical protein
DN82103_c0_g1	Down	3.90849	4.74887	9.04842e-06	0.000226136			Cvel_2355	hypothetical protein
DN89650_c0_g1	Down	4.17056	0.17593	9.72799e-06	0.000284969			Cvel_12989	hypothetical protein
DN110038_c0_g1	Down	2.01486	0.905029	1.0149e-05	0.000294579			Cvel_23509	hypothetical protein
DN112736_c1_g1	Down	2.00351	1.0556	1.01545e-05	0.000294579			Cvel_31832	hypothetical protein
DN56640_c0_g1	Down	2.19781	3.05979	1.01811e-05	0.000295183			Cvel_8937	hypothetical protein
DN106156_c0_g1	Down	3.7311	-0.156169	1.14001e-05	0.000324127			Cvel_8355	hypothetical protein
DN92660_c0_g1	Down	2.83789	-0.218823	1.19571e-05	0.000337627			Cvel_21822	hypothetical protein
DN27929_c0_g1	Down	2.98641	0.277621	2.94815e-06	8.61254e-05			Cvel_8397	hypothetical protein
DN95986_c0_g1	Down	4.06332	2.08312	1.09375e-06	3.6042e-05			Cvel_12952	hypothetical protein
DN30895_c0_g1	Down	2.80679	0.385778	5.11928e-07	1.81783e-05			Cvel_22962	hypothetical protein
DN107951_c0_g1	Down	3.60134	3.35339	1.51872e-05	0.00041147			Cvel_24036	hypothetical protein
DN101658_c0_g1	Down	2.31388	0.532644	2.06701e-08	1.03373e-06			Cvel_14563	hypothetical protein
DN107341_c0_g1	Down	2.07722	0.498676	6.08037e-06	0.000161018			Cvel_16645	hypothetical protein
DN107260_c0_g1	Down	2.07723	0.817917	1.89651e-05	0.000498166			Cvel_24326	hypothetical protein
DN106684_c0_g1	Down	2.00683	1.22586	2.02234e-05	0.000526382			Cvel_1353	hypothetical protein
DN113301_c5_g2	Down	2.26161	0.872269	2.26906e-05	0.00057927			Cvel_27995	hypothetical protein
DN134073_c0_g1	Down	2.4308	0.386968	1.87045e-07	7.40174e-06			Cvel_17568	hypothetical protein
DN107220_c4_g1	Down	2.26667	0.0506953	2.69156e-05	0.000664448			Cvel_15646	hypothetical protein
DN109668_c0_g2	Down	4.89581	0.583879	2.72411e-05	0.000671508			Cvel_29073	hypothetical protein
DN71312_c0_g1	Down	2.33361	0.738459	2.94495e-05	0.000714979			Cvel_14628	hypothetical protein
DN109511_c0_g1	Down	2.07127	0.724348	3.84887e-05	0.000898257			Cvel_33121	hypothetical protein
DN112523_c5_g2	Down	5.49294	4.00708	4.28785e-31	4.74031e-28				hypothetical protein
DN107882_c0_g1	Down	11.7467	2.61267	6.27696e-27	4.9109e-24				hypothetical protein
DN67371_c1_g1	Down	3.17378	3.43836	5.78521e-25	2.88053e-22				hypothetical protein
DN112720_c2_g1	Down	10.6113	1.48877	3.80551e-17	9.30411e-15				hypothetical protein
DN28747_c1_g1	Down	5.65985	7.46727	1.05494e-14	1.53695e-12				hypothetical protein
DN106702_c0_g1	Down	9.536	0.416345	1.51869e-14	2.49134e-12				hypothetical protein
DN42615_c0_g1	Down	8.80614	-0.267415	5.65336e-13	7.52607e-11				hypothetical protein
DN75878_c0_g1	Down	9.13766	0.017284	2.84869e-11	2.74891e-09				hypothetical protein
DN113143_c1_g1	Down	9.79446	0.670217	4.77676e-11	4.46539e-09				hypothetical protein
DN131640_c0_g1	Down	4.20008	5.39861	1.52257e-10	1.11812e-08				hypothetical protein
DN110804_c1_g1	Down	2.86325	2.49644	1.66152e-07	6.66814e-06				hypothetical protein
DN112692_c5_g1	Down	2.43852	2.98631	4.19018e-09	2.66983e-07				hypothetical protein
DN89517_c0_g1	Down	6.32606	5.70159	2.02534e-09	1.22521e-07				hypothetical protein
DN110293_c0_g1	Down	2.25939	1.66395	1.8628e-08	1.05023e-06				hypothetical protein
DN14217_c0_g1	Down	6.32931	6.19557	2.18386e-08	1.20715e-06				hypothetical protein
DN57042_c0_g1	Down	2.27954	2.61726	2.2288e-08	1.22799e-06				hypothetical protein
DN40139_c0_g1	Down	2.13742	2.66433	1.55168e-09	9.5916e-08				hypothetical protein
DN111208_c0_g1	Down	3.16108	2.33913	3.91687e-08	2.05561e-06				hypothetical protein
DN80339_c0_g1	Down	2.84582	6.15688	1.16829e-05	0.00028202				hypothetical protein
DN131297_c0_g1	Down	6.81557	8.32071	8.66575e-08	3.73948e-06				hypothetical protein
DN111062_c1_g1	Down	5.19304	8.92969	3.12276e-06	9.05841e-05				hypothetical protein
DN31361_c0_g1	Down	2.05277	2.40055	6.00291e-10	3.99988e-08				hypothetical protein
DN81426_c0_g1	Down	2.83132	0.426272	4.21293e-07	1.76478e-05				hypothetical protein
DN120830_c0_g1	Down	8.39411	-0.694029	5.16853e-07	2.10272e-05				hypothetical protein
DN55166_c0_g1	Down	4.94316	5.79609	7.5679e-08	3.29396e-06				hypothetical protein
DN93432_c0_g1	Down	5.928	6.75547	1.56156e-06	4.94786e-05				hypothetical protein
DN9561_c0_g1	Down	8.77401	9.77747	1.78837e-07	7.12673e-06				hypothetical protein
DN104361_c0_g1	Down	3.05453	1.25139	1.2556e-06	4.66416e-05				hypothetical protein
DN59273_c0_g1	Down	2.49958	0.181257	1.35004e-06	4.9642e-05				hypothetical protein
DN52423_c0_g1	Down	5.12325	-0.522145	1.46982e-06	5.3352e-05				hypothetical protein
DN105973_c0_g1	Down	2.52621	0.406449	4.13635e-09	2.38142e-07				hypothetical protein
DN21831_c0_g1	Down	2.31771	0.771702	1.97856e-06	6.92006e-05				hypothetical protein
DN93535_c0_g1	Down	2.84514	1.96952	5.82133e-08	2.58592e-06				hypothetical protein
DN21893_c0_g1	Down	2.13596	0.941671	2.06201e-07	8.08214e-06				hypothetical protein
DN109257_c0_g1	Down	7.67145	7.57771	2.64898e-10	1.86956e-08				hypothetical protein
DN10615_c0_g1	Down	6.67289	6.12125	5.54062e-07	1.94911e-05				hypothetical protein
DN33857_c0_g1	Down	3.25418	1.99683	3.1591e-08	1.48638e-06				hypothetical protein
DN5190_c0_g1	Down	7.98037	6.63134	2.4904e-07	9.6116e-06				hypothetical protein
DN83239_c0_g1	Down	4.60874	-0.737729	4.75664e-06	0.000151753				hypothetical protein
DN14912_c0_g1	Down	3.69064	0.215997	8.95185e-08	3.83373e-06				hypothetical protein
DN47465_c0_g1	Down	5.70429	-0.0253695	9.82486e-06	0.000286651				hypothetical protein
DN83151_c0_g1	Down	3.56123	3.77937	1.7541e-06	5.48503e-05				hypothetical protein
DN48258_c0_g1	Down	2.14135	0.839448	1.73157e-06	5.42584e-05				hypothetical protein
DN19251_c0_g1	Down	2.07255	0.623026	1.27856e-05	0.00035569				hypothetical protein
DN83571_c1_g1	Down	4.67128	-0.413807	1.66198e-05	0.000443665				hypothetical protein
DN103445_c0_g1	Down	11.0029	1.88498	1.96434e-05	0.000513596				hypothetical protein
DN4749_c0_g1	Down	11.5862	4.93183	1.34691e-06	4.34058e-05				hypothetical protein
DN67127_c0_g1	Down	2.14957	1.12297	3.70937e-08	1.72204e-06				hypothetical protein
DN111180_c0_g1	Down	4.98149	7.67755	5.01925e-06	0.000135693				hypothetical protein
DN89617_c0_g1	Down	3.90314	0.358393	1.16845e-06	3.80882e-05				hypothetical protein
DN17608_c0_g1	Down	2.2044	1.77927	9.15476e-07	3.06127e-05				hypothetical protein
DN116567_c0_g1	Down	11.4441	4.04389	2.51312e-05	0.000628331				hypothetical protein
DN100846_c0_g1	Down	2.01957	0.850017	2.51951e-05	0.000629618				hypothetical protein
DN41366_c0_g1	Down	2.02398	1.77489	2.50527e-07	9.66006e-06				hypothetical protein
DN89816_c0_g1	Down	3.60819	0.359394	2.74233e-05	0.000675342				hypothetical protein
DN55916_c1_g1	Down	2.42712	0.465322	2.79413e-05	0.000684124				hypothetical protein
DN75927_c0_g1	Down	2.93725	0.676098	2.8609e-06	8.3847e-05				hypothetical protein
DN93177_c1_g1	Down	3.63427	3.08946	5.3213e-06	0.000143176				hypothetical protein
DN59800_c0_g1	Down	5.22347	2.43359	5.60058e-09	3.17203e-07				hypothetical protein
DN30557_c0_g1	Down	5.42385	2.66693	1.15249e-06	3.76762e-05				hypothetical protein
DN43182_c0_g1	Down	2.11157	3.59705	3.47948e-05	0.000824152				hypothetical protein
DN113759_c1_g1	Down	3.43605	-0.163623	3.4832e-05	0.000824649				hypothetical protein
DN103132_c2_g1	Down	2.32831	1.12454	1.96474e-06	6.04362e-05				hypothetical protein
DN113107_c0_g1	Down	12.5389	3.40632	7.07402e-46	2.56959e-42			Cvel_15183	Golgi SNAP receptor complex member 1	GO:0031886	molecular_function
DN102561_c0_g1	Down	4.06321	0.0894711	1.49035e-10	1.2486e-08			Cvel_5679	Far upstream element-binding protein 2	GO:0001165	molecular_function
DN13360_c0_g1	Down	3.25444	2.12241	7.75341e-14	9.92893e-12			Cvel_8681	DNA-directed RNA polymerase subunit alpha	GO:0000428	cellular_component
DN102877_c0_g1	Down	8.5093	-0.5725	9.02144e-10	6.58216e-08			Cvel_12231	Cell division cycle protein 27 homolog	GO:0007049	biological_process
DN94333_c0_g1	Down	4.90778	-0.0650365	5.25332e-12	5.00059e-10			Cvel_29492	Extensin	GO:0048222	cellular_component
DN77499_c0_g1	Down	8.73508	-0.358845	2.55525e-09	1.70531e-07	Q9UM11		Cvel_522	Protein FIZZY-RELATED 1	GO:1904666	biological_process
DN113641_c6_g2	Down	2.91287	2.40919	4.61612e-09	2.91613e-07			Cvel_12223	alpha-trehalose-phosphate synthase	GO:0047260	molecular_function
DN88928_c0_g1	Down	8.72832	-0.371988	4.65778e-09	2.93879e-07			Cvel_31690	Inositol phosphoceramide mannosyltransferase 3	GO:0006673	biological_process
DN107363_c0_g1	Down	8.86815	-0.244023	1.2698e-08	7.338e-07	Q8KN33	PF13410.6	Cvel_12771	Glutathionyl-hydroquinone reductase YqjG	GO:1902314	molecular_function
DN118223_c0_g1	Down	3.68287	0.296825	2.58473e-08	1.25296e-06			Cvel_1887	[Skp1-protein]-hydroxyproline	GO:0033830	molecular_function
DN89335_c0_g1	Down	3.02051	0.341964	9.91346e-07	3.80196e-05			Cvel_96	Putative diaminopropionate ammonia-lyase	GO:0008838	molecular_function
DN133823_c0_g1	Down	5.96415	3.46466	8.86815e-08	3.8123e-06			Cvel_18080	30S ribosomal protein S1	GO:0000028	biological_process
DN84163_c0_g1	Down	3.91952	0.124255	3.04126e-08	1.43691e-06			Cvel_29492	Extensin	GO:0048222	cellular_component
DN108666_c0_g1	Down	2.33887	1.32902	5.83226e-11	4.6689e-09			Cvel_8681	DNA-directed RNA polymerase subunit alpha	GO:0000428	cellular_component
DN27427_c0_g1	Down	2.65444	0.540887	2.00476e-06	6.14169e-05			Cvel_2449	Kinesin-like protein KIF21B	GO:0042988	molecular_function
DN28502_c0_g1	Down	2.1982	0.617316	2.9067e-06	8.50621e-05			Cvel_18877	Probable E3 ubiquitin-protein ligase LOG2	GO:0044695	cellular_component
DN109235_c0_g1	Down	2.81729	0.465736	4.1469e-07	1.51042e-05			Cvel_17663	GTPase Der	GO:0051020	molecular_function
DN101767_c0_g1	Down	2.87405	2.35285	2.74641e-07	1.04773e-05			Cvel_1887	[Skp1-protein]-hydroxyproline	GO:0033830	molecular_function
DN68293_c0_g1	Down	3.41229	0.162767	3.1754e-06	0.000106168			Cvel_8681	DNA-directed RNA polymerase subunit alpha	GO:0000428	cellular_component
DN56110_c0_g1	Down	4.21041	2.19616	1.08677e-07	4.55941e-06			Cvel_14669	Transmembrane and TPR repeat-containing protein 1	GO:1990713	cellular_component
DN102949_c0_g1	Down	4.17329	-0.380338	8.9462e-08	3.83373e-06			Cvel_15690	CDK5 regulatory subunit-associated protein 2	GO:0034237	molecular_function
DN102045_c0_g1	Down	4.51057	0.95674	4.009e-06	0.000129856			Cvel_25758	DNL-type zinc finger protein	GO:0070742	molecular_function
DN112948_c6_g1	Down	2.06202	3.07886	6.61487e-06	0.000203998			Cvel_1260	Piwi-like protein 1	GO:0035354	cellular_component
DN101863_c0_g1	Down	5.0931	0.346077	6.95358e-06	0.000213151			Cvel_14109	DEAD-box ATP-dependent RNA helicase 25	GO:0017151	molecular_function
DN107563_c0_g1	Down	4.60677	2.64936	8.86913e-06	0.000263145			Cvel_2650	Fibrillin-2	GO:0001527	cellular_component
DN107706_c0_g1	Down	5.30757	5.58053	1.95166e-06	6.00744e-05	Q7KQL8	PF00085.20	Cvel_621	Thioredoxin	GO:0042964	biological_process
DN15558_c0_g1	Down	2.06901	1.04285	5.78476e-07	2.02642e-05			Cvel_17931	Carnitinyl-CoA dehydratase	GO:0018819	molecular_function
DN28044_c1_g1	Down	11.8551	2.73213	1.40057e-05	0.000384582			Cvel_18728	Flocculation protein FLO11	GO:0000128	biological_process
DN66654_c0_g1	Down	2.26746	2.72437	4.06434e-06	0.00011424			Cvel_417	Sirohydrochlorin ferrochelatase	GO:0051266	molecular_function
DN113681_c20_g1	Down	2.22842	1.67917	8.1271e-07	2.75628e-05			Cvel_21859	Flocculation protein FLO11	GO:0000128	biological_process
DN106700_c0_g1	Down	2.47998	0.400111	3.79776e-05	0.000888368			Cvel_8321	Cytosolic carboxypeptidase 2	GO:0004180	molecular_function
DN95341_c0_g1	Down	2.26055	-0.153012	3.89153e-05	0.000906136			Cvel_16684	Leucine-rich repeat extensin-like protein 5	GO:0035872	biological_process
DN75608_c0_g1	Down	9.00659	2.34515	1.16298e-10	8.72424e-09	P50995			Annexin A11	GO:1990667	cellular_component
DN133641_c0_g1	Down	9.99197	5.77355	7.21767e-08	3.14454e-06	Q8TEK3			Histone-lysine N-methyltransferase	GO:0031151	molecular_function
DN105281_c0_g1	Down	8.6507	1.99964	5.25325e-06	0.000141429	Q9H0Z9			RNA-binding protein 38 (CLL-associated antigen KW-5) (HSRNASEB)	GO:0034584	molecular_function
DN103529_c0_g1	Down	8.73503	3.51144	2.07669e-06	6.31578e-05	Q13530			Serine incorporator 3	GO:0031132	molecular_function
DN115961_c0_g1	Down	13.0576	3.90346	5.69653e-07	1.9993e-05	Q5VV67			Peroxisome proliferator-activated receptor gamma coactivator-related protein 1	GO:0042975	molecular_function
DN111448_c0_g1	Down	11.9115	2.76037	2.21172e-06	6.69425e-05	Q68EM7			Rho GTPase-activating protein 17 (Rho-type GTPase-activating protein 17)	GO:0032794	molecular_function
DN26609_c0_g1	Down	2.10492	1.58937	5.34076e-08	2.3912e-06		PF03335.13	Cvel_1869	Phage_fiber	GO:0009271	biological_process
DN97564_c1_g1	Down	9.99197	5.77355	7.21767e-08	3.14454e-06			Cvel_7136	superoxide dismutase	GO:0004784	molecular_function
DN100508_c0_g1	Down	8.6507	1.99964	5.25325e-06	0.000141429			Cvel_26697	superoxide dismutase	GO:0004784	molecular_function
DN109194_c0_g1	Down	2.25939	1.66395	1.8628e-08	1.05023e-06			Cvel_26697	superoxide dismutase	GO:0004784	molecular_function
