# Supplementary material
Source: Preprints.org preprint supplement (doi:10.20944/preprints201909.0251.v1)
Supplement: Supplementary file 2 [file Table S1.xls]

## Sheet: Sheet1
Organism	Gene ID	Product Description	SignalP 4	SignalP 3 HMM	cleavage position	ASA-find	targetP	iPSORT	Wolf PSORT	mitoprot	DeepLoc	conclusion
Chromera Velia	DN93254_c0_g1	heme_oxygenase_1	noTM	yes	25-26		M	no	nucl: 16.5, cyto_nucl: 12, cyto: 6.5, E.R._mito: 5.5, E.R.: 4, mito: 3	0.06	nucl.	nucl.
Vitrella brassicaformis	Vbra_14541	heme_oxygenase_1	TM	yes	55-56		M	mTP	mito: 14, cyto: 8, nucl: 7	0.99	Plas.	Mito.
Vitrella brassicaformis	Vbra_20700	heme_oxygenase_2	noTM	no			-	no	cyto: 15, cyto_nucl: 13.5, mito: 7, nucl: 6	0.04	Cyto.	Cyto.
Chromera Velia	DN100508_c0_g1	Mn_SOD	noTM	yes	20-21		M	SP	mito: 16, extr: 11, pero: 3, cyto: 1.5, cyto_nucl: 1.5	0.9585	E.R	Mito.
Chromera Velia	DN109194_c0_g1	Mn_SOD	noTM	no			-		cyto: 25.5, cyto_nucl: 16, nucl: 5.5, mito: 1	0.0496	Cyto.	Cyto.
Chromera Velia	DN110975_c0_g1	Fe_SOD2	noTM	yes	17-18	SP/no plast	S_M2		extr: 21, mito: 7, cyto: 2, E.R.: 1, pero: 1	0.1047	Extra.	Plast
Chromera Velia	DN97564_c1_g1	Fe_SOD1	noTM	yes	19-20	SP/plast_H	S_M5	SP	E.R.: 8, extr: 6, mito: 6, plas: 5, golg: 4, pero: 2, cyto: 1	0.3137	Plas.	Plast
Vitrella brassicaformis	Vbra_9701	Mn_SOD	noTM	no			-		nucl: 15.5, cyto_nucl: 14, cyto: 11.5, extr: 2, plas: 1, mito: 1, cysk: 1	0.2125	Extra.	Cyto.
Vitrella brassicaformis	Vbra_1709	Mn_SOD	noTM	yes	18-19	SP/plast_L	-	SP	extr: 14, plas: 11, E.R.: 4, nucl: 1.5, cyto_nucl: 1.5, lyso: 1	0.0388	Extra.	Plast
Vitrella brassicaformis	Vbra_19404	Mn_SOD	noTM	yes	25-26	SP/no plast	-	SP	extr: 22, pero: 3, mito: 2, E.R.: 2, lyso: 2, cyto: 1	0.4419	Extra.	extr.
Vitrella brassicaformis	Vbra_13639	Fe_SOD1	noTM	yes	16-17	SP/plast_L	S_M3	SP	extr: 28, cyto: 1, mito: 1, pero: 1, lyso: 1	0.5719	Extra.	Plast
Vitrella brassicaformis	Vbra_9665	Fe_SOD	noTM	no			-		cyto: 21.5, cyto_nucl: 14.5, nucl: 6.5, extr: 3, mito: 1	0.4289	Cyto.	Cyto.
Vitrella brassicaformis	Vbra_23058	Fe_SOD	noTM	no			M		mito: 19, cyto: 12, extr: 1	0.9827	Mito.	Mito.
Vitrella brassicaformis	Vbra_10461	Fe_SOD	noTM	yes	18-19	SP/plast_L	S_M	SP	extr: 23, E.R.: 5.5, E.R._mito: 4, mito: 1.5, cyto: 1, pero: 1	0.5236	Extra.	Plast
Chromera velia	DN11036_c0_g1	NADPH_cytochrome_P450_reductase1	TM	no	20-21	SP/no plast	S_20		extr: 11, cyto: 3, plas: 3, E.R.: 3, pero: 2, vacu: 2, nucl: 1, mito: 1, golg: 1	0.0777	E.R	E.R
Vitrella brassicaformis	Vbra10009	NADPH_cytochrome_P450_reductase1	noTM	yes			M		extr: 6, E.R._golg: 6, mito: 5, E.R.: 5, golg: 5, mito_pero: 4.83333, cyto_mito: 4.83333, nucl: 4.5, cyto_nucl: 4.33333, cyto: 3, plas: 1, lyso: 1	0.3187	E.R	E.R
Chromera velia	DN35954_c0_g1	cytochrome_P450	TM	no			-		extr: 12, plas: 5, cyto: 3.5, cyto_nucl: 3.5, E.R.: 3, nucl: 2.5, pero: 2, lyso: 2, mito: 1, golg: 1	0.0617	E.R	Cyto.
Chromera velia	DN110970_c1_g1	cytochrome_P450	TM	yes	20-21		S_M3	SP	E.R.: 11, mito: 7, plas: 4, cyto: 3.5, cyto_nucl: 3, pero: 3, nucl: 1.5, extr: 1, golg: 1	0.9536	E.R	E.R
Chromera velia	DN100624_c0_g1	cytochrome_P450	noTM	yes	30-31	SP/plast_L	S_M5	SP	E.R.: 7, golg: 6, mito: 5, plas: 3, extr: 3, pero: 3, lyso: 3, cyto: 1.5, cyto_nucl: 1.5	0.8354	E.R	E.R
Chromera velia	DN106578_c0_g1	cytochrome_P450	TM	yes	22-23		-		nucl: 13.5, cyto_nucl: 11, extr: 9, cyto: 7.5, mito: 1, golg: 1	0.0809	E.R	nucl.
Chromera velia	DN46825_c0_g1	cytochrome_P450	TM	yes	25-26		S_M3	SP	E.R.: 7.5, E.R._golg: 6, extr: 5, mito: 5, golg: 3.5, cyto: 3, lyso: 3, plas: 2, pero: 2, nucl: 1	0.9571	E.R	E.R
Chromera velia	DN17213_c0_g1	cytochrome_P450	TM	yes	55-56		S_19		extr: 9, nucl: 8, cyto_nucl: 8, cyto: 6, E.R.: 4.5, E.R._golg: 3, plas: 2, mito: 1, pero: 1	0.1205	E.R	nucl.
Chromera velia	DN103160_c0_g1	cytochrome_P450	TM	yes	27-28		S_34		extr: 11.5, cyto: 7.5, cyto_nucl: 7, extr_plas: 7, nucl: 5.5, E.R.: 3, pero: 2, plas: 1.5, lyso: 1	0.092	E.R	nucl.
Chromera velia	DN110530_c0_g1	cytochrome_P450	noTM	no			-		nucl: 19, cyto_nucl: 14, cyto: 7, plas: 2, cysk: 2, E.R.: 1, golg: 1	0.0145	Plas.	Cyto.
Chromera velia	DN54179_c0_g1	cytochrome_P450	TM	no			M		E.R.: 14, extr: 8, cyto_mito: 2.66667, cyto_nucl: 2.33333, mito_pero: 2.33333, plas: 2, cyto: 2, mito: 2, nucl: 1.5, pero: 1.5, golg: 1	0.7889	E.R	E.R
Chromera velia	DN97807_c0_g1	cytochrome_P450	TM	yes	18-19		S_M3	SP	plas: 15, E.R.: 8.5, E.R._golg: 6, golg: 2.5, extr: 2, lyso: 2, mito: 1, pero: 1	0.6681	E.R	Plast
Chromera velia	DN68189_c0_g1	cytochrome_P450	TM	no			-		nucl: 15.5, cyto_nucl: 9.5, extr: 6, E.R.: 6, cyto: 2.5, mito: 1, lyso: 1	0.2364	E.R	nucl.
Chromera velia	DN57702_c0_g1	cytochrome_P450	TM	yes	17-18		S_27	SP	extr: 7, E.R.: 7, mito: 5, golg: 5, plas: 4, pero: 2, cyto: 1, lyso: 1	0.3026	E.R	E.R
Chromera velia	DN35386_c0_g1	cytochrome_P450	TM	yes	19-20		S_19	SP	E.R.: 23, E.R._golg: 13, pero: 5, extr: 3	0.3238	E.R	E.R
Chromera velia	DN40057_c0_g1	cytochrome_P450	noTM	no			-		nucl: 24, cyto_nucl: 16, cyto: 6, lyso: 1, golg: 1	0.0109	Cyto.	Cyto.
Chromera velia	DN88899_c0_g1	cytochrome_P450	TM	no			M		nucl: 7.5, plas: 7, cyto_nucl: 5, E.R.: 4.5, E.R._mito: 3.83333, pero: 3.5, mito_pero: 3.33333, extr: 3, golg: 3, mito: 2, cyto: 1.5	0.0128	E.R	nucl.
Chromera velia	DN57132_c0_g1	cytochrome_P450	noTM	no			M		nucl: 17, mito: 7.5, plas: 5, cyto_mito: 5, cyto: 1.5, extr: 1	0.2313	Cyto.	Cyto.
Chromera velia	DN10519_c0_g1	cytochrome_P450	TM	no			S_44		nucl: 8.5, cyto_nucl: 8.5, plas: 8, cyto: 7.5, E.R.: 3, pero: 3, extr: 2	0.013	E.R	nucl.
Chromera velia	DN49836_c0_g1	cytochrome_P450	TM	yes	30-31		-		E.R.: 18, extr: 10, lyso: 2, mito: 1, golg: 1	0.607	E.R	E.R
Chromera velia	DN49034_c0_g1	cytochrome_P450	TM	yes	22-23		S_M5	SP	extr: 14, E.R.: 7, plas: 5, cyto: 2, lyso: 2, mito: 1, pero: 1	0.6911	E.R	E.R
Vitrella brassicaformis	Vbra_15271	cytochrome_P450	TM	no			S_47		E.R.: 15, plas: 8, extr: 4, pero: 3, cyto: 2	0.0579	E.R	E.R
Vitrella brassicaformis	Vbra_22291	cytochrome_P450	TM	yes	22-23				E.R.: 13, plas: 11, pero: 2.5, cyto_pero: 2.5, extr: 2, mito: 2, cyto: 1.5	0.0086	Pero.	E.R
Vitrella brassicaformis	Vbra_10092	cytochrome_P450	TM	no					extr: 9, E.R.: 8, plas: 5, cyto: 3, cysk: 3, nucl: 1, mito: 1, pero: 1, lyso: 1	0.2683	E.R	E.R
Vitrella brassicaformis	Vbra_11469	cytochrome_P450	noTM	no					cyto: 16.5, cyto_nucl: 11.5, nucl: 5.5, pero: 4, extr: 3, mito: 1, E.R.: 1, golg: 1	0.044	Mito.	Cyto.
Vitrella brassicaformis	Vbra_21587	cytochrome_P450	TM	no					E.R.: 14, cyto: 5.5, plas: 5, mito: 4.5, cyto_pero: 4.33333, mito_pero: 3.83333, pero: 2, nucl: 1	0.0741	E.R	E.R
Vitrella brassicaformis	Vbra_11766	cytochrome_P450	TM	yes	29-30		S_M2		plas: 22, extr: 7, E.R.: 2, lyso: 1	0.2322	E.R	Plast
Vitrella brassicaformis	Vbra_3993	cytochrome_P450	TM	yes	18-19		S_M2	SP	E.R.: 19, pero: 5, extr: 3, lyso: 3, mito: 1, golg: 1	0.9728	E.R	E.R
Vitrella brassicaformis	Vbra_11869	cytochrome_P450	TM	yes	37-38		S_38		E.R.: 12, mito_pero: 5, mito: 4, pero: 4, plas: 3, extr: 3, lyso: 3, cyto: 2, golg: 1	0.3592	E.R	E.R
Vitrella brassicaformis	Vbra_22347	cytochrome_P450	noTM	no					nucl: 17.5, cyto_nucl: 12.8333, plas: 5, cyto: 5, cyto_mito: 3.5, E.R.: 2, pero: 2	0.0294	nucl.	nucl.
Vitrella brassicaformis	Vbra_413	cytochrome_P450	TM	no			S_41		nucl: 9.5, cyto_nucl: 8, extr: 7, cyto: 5.5, mito_pero: 3.5, plas: 3, pero: 3, mito: 2, lyso: 2	0.3952	E.R	nucl.
Vitrella brassicaformis	Vbra_15420	cytochrome_P450	noTM	no					Cysk: 32	0.0539	Plas.	Cyto.
Vitrella brassicaformis	Vbra_14298	cytochrome_P450	TM	no					cyto: 14.5, cyto_nucl: 10, extr: 8, nucl: 4.5, mito: 2, pero: 1, lyso: 1, cysk: 1	0.0242	E.R	Cyto.
Vitrella brassicaformis	Vbra_1326	cytochrome_P450	noTM	no					nucl: 20.5, cyto_nucl: 12.5, plas: 7, cyto: 3.5, mito: 1	0.0765	Plas.	Cyto.
Vitrella brassicaformis	Vbra_861	cytochrome_P450	TM	yes	37-38		S_M1		plas: 26, E.R.: 4, extr: 2	0.0045	E.R	Plast
Vitrella brassicaformis	Vbra_21871	cytochrome_P450	noTM	yes	26-27		M	mTP	mito: 25, cyto: 5, extr: 1, pero: 1	0.9554	Mito.	Mito.
Vitrella brassicaformis	Vbra_5538	cytochrome_P450	TM	yes	31-32				E.R.: 10, cyto_pero: 7, extr: 6, pero: 6, mito: 5, cyto: 4, plas: 1	0.4689	E.R	E.R
Vitrella brassicaformis	Vbra_13086	cytochrome_P450	TM	no					E.R.: 8, nucl: 7, cyto: 6, mito_pero: 4.5, mito: 4, pero: 3, plas: 2, extr: 1, golg: 1	0.0871	E.R	E.R
Vitrella brassicaformis	Vbra_16262	cytochrome_P450	TM	yes	28-29		S_28		E.R.: 16, plas: 12, extr: 1, cyto: 1, mito: 1, pero: 1	0.0132	Plas.	E.R
Vitrella brassicaformis	Vbra_13111	cytochrome_P450	TM	yes	31-32		S_27	SP	E.R.: 10, plas: 6, pero: 6, mito_pero: 5.5, lyso: 4, mito: 3, cyto: 2, extr: 1	0.0823	E.R	E.R
