# Supplementary material
Source: Preprints.org preprint supplement (doi:10.20944/preprints201909.0251.v1)
Supplement: Supplementary file 4 [file Table S3.xlsx]

## Sheet: Table S3A
Gene description	Unigene IDs	Expression	Readcount						Foldchange	log2 Foldchange (FDR)
			Cvel_cont1	Cvel_cont2	Cvel_cont3	Cvel_mer1	Cvel_mer2	Cvel_mer3	Cvel_mer vs Cvel_cont
Fe superoxide dismutase 1, Fe-Mn family	DN97564_c1_g1	Down	2.451	1.273	2.145	1.398	1.25	1.31	0.674391	-0.568343
Fe superoxide dismutase 2, Fe-Mn family	DN110975_c0_g1	Down	21.033	15.468	21.777	16.23	16.769	18.811	0.889015	-0.169721
Mn superoxide dismutase, Fe-Mn family	DN100508_c0_g1	Down	7.735	4.965	7.553	4.935	4.418	4.209	0.669629	-0.578566
	DN109194_c0_g1	N/A	23.102	12.097	22.409	14.193	13.394	15.986	0.756371	-0.402835
ferritin-3	DN112480_c0_g3	N/A	0	376.546	0.01	0	0	0	0	N/A
monothiol glutaredoxin	DN110409_c0_g1	N/A	1.53	1.353	1.606	1.194	1.241	1.562	0.890399	-0.167477
	DN113489_c2_g1	N/A	77.484	74.335	75.319	102.066	122.11	117.834	1.50574	0.590469
	DN113489_c2_g2	N/A	3.175	2.993	2.58	3.528	3.788	3.788	1.26932	0.344054
	DN131408_c0_g1	N/A	0.672	0.837	1.098	0.667	1.213	0.748	1.00806	0.0115747
	DN33379_c0_g1	N/A	4.55	7.717	4.237	5.787	5.95	5.631	1.05235	0.0736159
nucleoside-diphosphate kinase	DN104871_c0_g1	N/A	3.495	2.786	2.745	3.889	2.312	1.197	0.819632	-0.286951
thioredoxin domain-containing protein	DN14687_c0_g1	N/A	1.727	2.396	2.051	2.259	2.106	2.002	1.03126	0.0444083
	DN131262_c0_g1	N/A	1.448	1.559	1.233	1.75	0.949	0.72	0.806368	-0.31049
	DN106822_c0_g1	N/A	0.931	1.319	0.808	1.241	0.837	0.627	0.884565	-0.17696
	DN84924_c0_g1	N/A	1.324	2.018	1.772	0.805	0.78	1.122	0.529331	-0.917757
	DN20277_c0_g1	N/A	0.476	0.126	0.3	0.278	0.442	0.327	1.16075	0.215062
	DN87120_c0_g1	N/A	0	7.568	0	0	0	0	0	N/A
	DN106657_c0_g1	N/A	1.303	1.238	0.964	0.63	0.677	0.533	0.524964	-0.929709
protein disulfide isomerase	DN110205_c0_g1	N/A	7.373	3.612	5.615	6.435	9.597	8.428	1.47349	0.559241
Thioredoxin-like	DN111822_c1_g1	N/A	27.92	27.599	26.854	44.117	47.054	44.554	1.64769	0.720443
	DN98236_c0_g1	N/A	0.776	0.676	0.891	0.583	0.498	0.384	0.625267	-0.677456
	DN105359_c1_g1	N/A	0.331	0.539	0.445	0.694	0.912	0.458	1.56958	0.65038
	DN119503_c0_g1	N/A	1.727	2.442	1.844	1.731	1.344	1.188	0.708964	-0.496216
	DN124169_c0_g1	N/A	0.259	0.55	0.58	0.278	0.122	0.14	0.388769	-1.36302
thioredoxin reductase (NADPH)	DN51375_c0_g1	N/A	0.031	0.161	0.383	0.259	0.921	0.683	3.24	1.69599
NADPH-dependent thioredoxin reductase	DN34324_c0_g1	N/A	0.248	0.046	0.435	0.268	0.16	0.224	0.894376	-0.161047
	DN102364_c0_g1	N/A	3.061	1.697	1.803	2.25	2.04	2.02	0.961744	-0.0562757
	DN108902_c0_g1	N/A	1.965	0.298	2.59	1.75	2.256	1.974	1.23223	0.301269
Ferredoxin-thioredoxin reductase	DN109873_c0_g1	N/A	4.25	3.314	4.527	5.064	4.869	4.527	1.19593	0.258134
flavin reductase (NADH)	DN94003_c0_g1	Up	1.82	1.25	1.16	7.777	7.783	6.847	5.29716	2.40522
pentachlorophenol monooxygenase	DN84518_c0_g1	Up	0.403	0.367	0.332	3.287	2.782	1.927	7.2559	2.85915
Quinone-oxidoreductase	DN112776_c1_g1	Up	2.016	1.376	2.01	8.675	20.999	21.496	9.47242	3.24373
	DN112776_c0_g1	Up	0.548	0.252	0.207	1.722	2.641	2.469	6.78451	2.76224
	DN112776_c1_g2	Up	1.21	0.814	0.466	5.305	7.858	6.52	7.90482	2.98273
NADH dehydrogenase (plastoquinone)	DN99597_c0_g1	Up	0.207	0.023	0.445	0.667	0.799	0.748	3.28	1.7137
Succinate dehydrogenase	DN50005_c0_g1	Up	1.22	1.387	1.637	1.991	2.124	2.189	1.48539	0.570843
	DN41221_c0_g1	N/A	0.714	0.562	0.373	1.167	1.25	1.048	2.10127	1.07126
	DN87339_c0_g1	N/A	0.693	0.505	0.477	1.296	0.996	0.973	1.94925	0.962922
	DN93032_c0_g1	N/A	0.434	0.206	0.186	0.713	0.837	0.889	2.95278	1.56208
	DN108779_c0_g1	N/A	5.45	4.495	4.382	7.935	9.71	7.979	1.78851	0.838759
	DN125547_c0_g1	N/A	0.631	0.734	0.518	0.972	1.513	1.59	2.1641	1.11377
	DN31098_c0_g1	N/A	1.303	1.559	1.502	2.065	2.585	2.469	1.6313	0.706023
	DN88573_c0_g1	N/A	9.152	5.389	7.501	14.166	17.643	16.557	2.19427	1.13374
	DN90451_c0_g1	N/A	0.331	0.619	0.539	0.38	0.649	0.823	1.24379	0.31474
	DN123815_c0_g1	N/A	0	4.449	0	0	0	0	0	N/A
	DN120323_c0_g1	N/A	0.372	0.31	0.238	0.315	0.226	0.187	0.791304	-0.337695
Trans-2-enoyl-CoA reductase	DN88663_c0_g1	Up	8.087	4.541	7.138	60.662	51.698	16.903	6.53966	2.70922
	DN94525_c0_g1	Up	0.558	0.711	0.508	2.972	3.703	2.61	5.2251	2.38546
	DN22446_c0_g1	N/A	0.176	0.103	0.228	0.139	0	0.627	1.51085	0.595359
	DN59895_c0_g1	N/A	1.013	0.459	1.336	1.185	1.41	1.328	1.39708	0.482414
	DN104266_c0_g1	N/A	2.409	2.064	2.445	0.759	1.842	2.32	0.711333	-0.491403
	DN119177_c0_g1	N/A	0.062	0.218	0.321	0.268	0.244	0.103	1.02329	0.0332214
	DN92497_c0_g1	N/A	1.706	0.424	1.067	0.768	1.194	1.571	1.1051	0.144175
Kynurenine 3-monooxygenase	DN7632_c0_g1	Up	0	0.355	0.155	2.694	2.829	2.123	14.9922	3.90614
	DN60281_c1_g1	N/A	1.541	1.64	1.233	2.259	1.786	1.609	1.28092	0.357185
	DN64967_c0_g1	N/A	0.217	0.929	0.777	0.361	0.517	0.15	0.534581	-0.903518
	DN126456_c0_g1	N/A	0.393	0.138	0.104	0.194	0.197	0.243	0.998425	-0.00227375
	DN37450_c0_g1	N/A	0	0	0.29	0.083	0	0.533	2.12414	1.08688
	DN107600_c0_g1	N/A	4.023	3.623	4.279	6.222	5.743	6.305	1.53208	0.615487
	DN50202_c0_g1	N/A	0	0.103	0.093	0.093	0.874	0.823	9.13265	3.19103
	DN73858_c0_g1	N/A	0	0	0	0.306	0.404	0.262	N/A	N/A
	DN78712_c0_g1	N/A	0.114	0	0	0.389	0.884	0.561	16.0877	4.00789
indole-3-acetic acid amido synthetase	DN133310_c0_g1	Up	0	0.115	0.104	1.926	2.312	2.432	30.4566	4.92868
	DN74155_c0_g1	N/A	2.285	2.064	2.373	2.241	1.73	1.815	0.860756	-0.216324
	DN121570_c0_g1	N/A	0.383	0.321	0.228	0.065	0.338	0.215	0.66309	-0.592723
	DN121568_c0_g1	N/A	1.024	1.708	1.751	2.62	1.56	1.141	1.18693	0.247233
	DN85649_c0_g1	N/A	0	0	0	1.38	0.865	0.393	N/A	N/A
12-oxophytodienoate reductase	DN108693_c0_g1	Up	2.668	1.995	2.777	15.601	19.401	16.192	6.88091	2.7826
	DN89225_c0_g1	Up	3.702	1.984	2.238	22.017	25.567	17.333	8.19245	3.0343
Thioredoxin	DN107579_c0_g1	Up	5.274	3.36	4.051	31.646	38.661	27.239	7.68987	2.94296
	DN107706_c0_g1	Down	3.051	120.852	110.244	2.722	2.077	2.198	0.0298829	-5.06453
	DN108734_c0_g1	N/A	2.399	1.364	1.834	1.972	1.767	1.674	0.967125	-0.0482254
	DN13125_c0_g1	N/A	1.096	0.757	0.487	0.204	1.09	0.917	0.944872	-0.0818095
	DN39488_c0_g1	N/A	0.424	0	0.218	0.602	0.291	0	1.39097	0.476087
	DN79532_c0_g1	N/A	0.786	0.883	1.036	0.528	0.451	0.477	0.538262	-0.893618
	DN106810_c1_g1	N/A	0.92	0	0.083	0.046	0.038	0.346	0.428714	-1.22191
	DN10622_c0_g1	N/A	1.231	0.894	0.984	1.5	0.902	0.748	1.01319	0.0189012
	DN65783_c0_g1	N/A	0.662	0.791	0.974	0.815	0.526	0.271	0.664194	-0.590322
	DN42723_c0_g1	N/A	1.582	0.883	1.471	0.907	0.893	1.3	0.787602	-0.344462
	DN74242_c0_g1	N/A	4.829	3.394	5.325	4.129	5.226	7.006	1.20763	0.272181
	DN84685_c0_g1	N/A	3.381	1.846	2.155	2.315	1.598	2.488	0.867109	-0.205714
	DN94302_c0_g1	N/A	0.858	0.459	0.756	1.018	0.733	0.673	1.16932	0.22567
	DN128854_c0_g1	N/A	0.207	1.376	0.601	0.37	0.367	0.337	0.491758	-1.02398
	DN55224_c0_g1	N/A	0.631	1.101	0.995	1.805	1.241	0.748	1.39127	0.476405
	DN109420_c0_g1	N/A	3.63	3.83	4.403	4.62	4.042	3.667	1.03928	0.0555869
	DN60592_c0_g1	N/A	1.158	1.227	0.932	1.731	1.344	1.113	1.26259	0.336382
	DN101883_c0_g1	N/A	5.005	1.319	4.859	2.481	2.839	3.498	0.788518	-0.342784
	DN60392_c0_g1	N/A	1.024	0.195	0.135	0.509	0.338	0.281	0.833087	-0.263461
	DN95275_c0_g1	N/A	1.934	1.17	0.932	0.843	1.805	1.693	1.07557	0.105101
	DN114032_c0_g1	N/A	0	4.919	0	0	0	0	0	N/A
	DN108_c0_g1	N/A	3.919	2.454	2.942	2.092	2.66	4.069	0.946967	-0.0786136
	DN108_c1_g1	N/A	1.303	0.527	0.477	0.648	0.865	0.758	0.984395	-0.0226903
Cytochrome c	DN60375_c0_g1	N/A	0.341	0.654	0.694	0.37	0.282	0.122	0.458259	-1.12576
	DN111319_c0_g1	N/A	8.635	7.751	6.838	13.36	12.295	9.682	1.52157	0.605563
	DN112862_c0_g1	N/A	4.333	3.348	3.833	6.24	5.696	4.752	1.44937	0.535422
Glutathione reductase	DN25890_c0_g1	N/A	1.127	0.046	0.041	0.157	0.329	0.421	0.747117	-0.420594
	DN48999_c0_g1	N/A	0.362	0.229	0.477	1.028	0.968	0.477	2.31554	1.21135
	DN74073_c0_g1	N/A	0.496	0.527	0.176	0	0.122	0.14	0.218515	-2.19419
	DN105625_c0_g1	N/A	5.967	6.673	5.512	10.721	8.215	4.836	1.30961	0.389135
	DN106477_c0_g1	N/A	8.262	6.088	6.454	7.86	10.161	8.157	1.25832	0.331494
	DN106477_c1_g1	N/A	3.671	3.027	2.331	4.953	4.531	4.247	1.52077	0.604799
	DN102330_c0_g1	N/A	2.409	2.867	2.611	4.231	5.217	3.994	1.70432	0.769199
	DN19325_c0_g1	N/A	0	1.938	0	0	0	0	0	N/A
	DN30147_c0_g1	N/A	1.21	0.573	0.694	1.176	1.363	0.636	1.28179	0.358163
	DN47438_c0_g1	N/A	0.331	0.493	0.477	0.324	0.254	0.187	0.588009	-0.766089
	DN79945_c0_g1	N/A	1.386	0.596	1.109	1.055	1.589	1.824	1.44549	0.531556
	DN87956_c0_g1	N/A	0.6	0.47	0.622	0.435	1.184	0.963	1.526	0.609759
peroxiredoxin	DN30185_c0_g1	N/A	0.248	0.115	0	0.343	0.216	0.037	1.64187	0.715343
	DN32721_c0_g1	N/A	0.062	0.115	0.135	0.685	0.489	0.037	3.88141	1.95658
	DN102193_c0_g1	N/A	0	21.533	0	0	0	0	0	N/A
	DN106626_c0_g1	N/A	10.868	7.728	8.775	8.777	10.387	11.038	1.10343	0.141996
	DN121417_c0_g1	N/A	0	1.261	0	0	0	0	0	N/A
	DN131091_c0_g1	N/A	0	1.972	0	0	0	0	0	N/A
	DN132498_c0_g1	N/A	0	2.224	0	0	0	0	0	N/A
	DN134088_c0_g1	N/A	0	3.36	0	0	0	0	0	N/A
	DN81276_c0_g1	N/A	0	21.201	0	0	0	0	0	N/A
	DN93266_c0_g1	N/A	0	137.123	0	0	0	0	0	N/A
	DN111502_c0_g1	N/A	37.496	36.646	38.696	28.498	32.015	39.765	0.88869	-0.170248
	DN111502_c1_g1	N/A	9.969	23.712	19.332	12.332	14.908	7.773	0.660461	-0.598456
	DN32235_c0_g1	N/A	1.52	1.777	1.088	1.537	1.166	0.907	0.823261	-0.280578
	DN80097_c0_g1	N/A	1.334	0.585	0.497	0.222	0.432	0.627	0.530215	-0.91535
	DN68348_c0_g1	N/A	0	0.665	0.363	0.454	0.075	0	0.514591	-0.958501
	DN109251_c0_g1	N/A	20.341	15.433	15.478	15.749	16.12	15.266	0.919671	-0.12081
	DN113585_c1_g1	N/A	11.116	9.494	9.138	15.314	13.846	10.486	1.33273	0.414383
	DN128151_c0_g1	N/A	0.062	0.241	0.3	0.065	0.028	0.552	1.06965	0.0971412
	DN52854_c0_g1	N/A	0.196	0.562	0.704	0.556	0.348	0.178	0.740082	-0.434243
	DN96485_c0_g1	N/A	7.032	8.038	6.175	4.064	3.299	3.143	0.494516	-1.01591
	DN113631_c2_g1	N/A	21.375	18.667	19.995	38.728	49.621	51.279	2.3257	1.21766
	DN113631_c2_g2	N/A	93.885	81.982	86.343	153.794	239.079	273.038	2.53961	1.34461
	DN108300_c0_g1	N/A	6.608	5.767	5.626	7.407	8.901	9.289	1.42198	0.507898
	DN110162_c1_g1	N/A	0.962	0.722	0.653	1.852	1.72	0.963	1.94052	0.956445
	DN113302_c1_g1	N/A	15.76	11.317	11.51	9.407	9.127	9.429	0.724674	-0.464596
	DN113302_c1_g2	N/A	35.221	23.907	32.106	23.581	21.807	22.104	0.739768	-0.434855
Catalase_peroxidase	DN79540_c0_g1	N/A	0.414	0	0.518	1.352	1.579	1.964	5.25215	2.39291
Catalase_peroxidase2	DN112103_c0_g1	Up	4.271	2.935	3.761	13.471	18.94	16.978	4.50342	2.17102

## Sheet: Table S3B
Gene description	Unigene IDs	Xenobiotic phase	Expression	Readcount						Foldchange	log2 Foldchange (FDR)
				Cvel_cont1	Cvel_cont2	Cvel_cont3	Cvel_mer1	Cvel_mer2	Cvel_mer3	Cvel_mer vs Cvel_cont
Cytochrome P450	DN106578_c0_g1	Phase I	Up	1.106	0.631	0.87	5.287	5.358	4.518	5.81626	2.54009
	DN110970_c1_g1		Up	0.579	0.871	0.891	3.509	5.189	5.678	6.14097	2.61847
	DN35954_c0_g1		N/A	1.251	0.803	0.943	0.657	1.137	1.244	1.01368	0.0196028
	DN46825_c0_g1		N/A	0.527	0.722	0.228	2.361	1.448	1.029	3.27556	1.71174
	DN68189_c0_g1		N/A	3.888	1.651	6.206	3.583	7.191	8.625	1.65168	0.723936
	DN57702_c0_g1		N/A	1.427	0	0.85	0.37	0.611	0.898	0.825209	-0.277169
	DN88899_c0_g1		N/A	1.83	2.064	2.031	2.75	2.425	2.105	1.22869	0.297123
	DN40057_c0_g1		N/A	0.124	0.183	0.124	0.833	0.724	0.337	4.39443	2.13568
	DN49034_c0_g1		N/A	3.092	1.812	1.72	1.491	2.585	2.208	0.948671	-0.0760195
	DN49836_c0_g1		N/A	0.238	0.699	0.124	0.306	0.705	0.486	1.41093	0.49665
	DN10519_c0_g1		N/A	0.259	0.092	0.249	0.343	0.658	0.617	2.69667	1.43118
	DN57132_c0_g1		N/A	0.403	1.055	1.005	0.722	0.414	0.524	0.673975	-0.569233
	DN35386_c0_g1		N/A	0.072	0.31	0.238	0.204	0.113	0.168	0.782258	-0.354283
	DN97807_c0_g1		N/A	1.355	1.708	1.399	3.352	2.914	2.245	1.90744	0.931638
	DN103160_c0_g1		N/A	0.207	0.138	0.176	0.056	0.423	0.327	1.54702	0.629496
	DN17213_c0_g1		N/A	0.662	0.493	0.818	0.981	2.059	1.768	2.4369	1.28505
	DN54179_c0_g1		N/A	1.344	2.11	2.01	3.185	2.397	2.862	1.54539	0.627969
	DN100624_c0_g1		N/A	7.735	3.669	6.962	5.472	5.63	6.51	0.958946	-0.0604787
	DN110530_c0_g1		N/A	38.778	9.54	40.498	20.221	15.857	25.743	0.696057	-0.522723
Cytochrome b	DN111873_c0_g1		Up	0.786	0.367	0.28	4.963	7.078	5.135	11.986	3.58328
	DN587_c0_g1		N/A	0.145	0.275	0.363	0.176	0.197	0.196	0.726692	-0.460584
	DN47437_c0_g1		N/A	2.399	0.447	1.378	1.018	1.034	1.469	0.83357	-0.262625
	DN111991_c0_g1		N/A	11.851	5.102	11.49	6.62	7.172	9.934	0.83416	-0.261605
	DN109982_c0_g1		N/A	53.214	36.37	42.425	27.053	24.514	26.444	0.590952	-0.758887
	DN111839_c0_g1		N/A	1.437	2.763	8.433	6.046	1.504	0.954	0.673158	-0.570984
	DN111839_c0_g2		N/A	2.409	1.64	1.409	1.555	1.344	1.291	0.76768	-0.381422
	DN120906_c0_g1		N/A	2.058	0.791	0.684	1.065	1.09	0.589	0.776677	-0.364613
	DN108406_c0_g1		N/A	2.027	1.663	1.709	3.981	4.775	4.294	2.41711	1.27329
	DN40293_c0_g1		N/A	1.592	2.339	2.072	1.389	1.354	0.982	0.620523	-0.688443
	DN1478_c0_g1		N/A	0.579	0.241	0.352	0.167	0.62	1.366	1.83703	0.877376
	DN40990_c0_g1		N/A	5.357	1.387	5.605	4.222	4.897	6.772	1.28682	0.363816
	DN74200_c0_g1		N/A	1.024	0.046	0.964	0.963	0.978	1.506	1.69469	0.761022
	DN83807_c0_g1		N/A	1.923	0.436	1.968	0.926	1.09	1.89	0.902704	-0.147675
	DN121183_c0_g1		N/A	0.145	0.424	0.901	0.231	0.602	0.477	0.891156	-0.166249
	DN98471_c0_g1		N/A	4.612	1.754	2.569	2.889	3.168	2.563	0.964745	-0.0517799
NADPH-Cytochrome P450 reductase	DN11036_c0_g1		N/A	1.2	0.424	1.647	1.926	2.369	3.003	2.23112	1.15777
Bifunctional P-450/NADPH-P450 reductase	DN111402_c1_g1		Up	0.641	0.94	0.663	5.481	6.411	6.426	8.1631	3.02912
	DN111844_c0_g1		Up	3.609	1.101	2.652	10.231	17.831	24.068	7.08096	2.82394
	DN50070_c0_g1		Up	1.117	0.344	1.585	4.194	9.146	14.19	9.03808	3.17602
	DN111402_c0_g1		Up	0.682	0.241	0.508	2.879	4.935	6.136	9.74843	3.28517
	DN131800_c0_g1		N/A	0	3.039	0	0	0	0	0	N/A
	DN59524_c0_g1		N/A	0.134	0	0	0.491	0.959	0.945	17.8731	4.15972
	DN83509_c0_g1		N/A	0.434	0.252	0.373	1.37	0.752	0.645	2.61284	1.38562
Alcohol dehydrogenase	DN6103_c0_g1		N/A	0.693	0.287	0.404	0.148	0.545	0.73	1.02818	0.0400917
	DN26642_c0_g1		N/A	0.6	0.172	0.321	0.407	0.677	0.458	1.4108	0.496509
	DN50416_c0_g1		N/A	0.29	0.023	0.373	0.13	0.028	0.215	0.543732	-0.879033
	DN70721_c0_g1		N/A	1.003	0.585	1.109	1.241	1.1	0.963	1.22506	0.292858
	DN123113_c0_g1		N/A	0	0.676	0	0	0	0	0	N/A
	DN76473_c0_g1		N/A	1.53	0.241	0.456	0.5	0.987	0.645	0.957342	-0.0628941
	DN116360_c0_g1		N/A	0.62	0.768	0.777	0.805	0.573	1.169	1.17644	0.234432
	DN123646_c0_g1		N/A	0.165	0.287	0.083	0.148	0.056	0.122	0.609346	-0.714667
	DN105673_c0_g1		N/A	1.396	2.373	1.906	1.5	1.673	1.253	0.779912	-0.358617
	DN105673_c2_g1		N/A	3.712	3.486	3.263	4.777	3.901	3.367	1.15142	0.203414
	DN1577_c0_g1		N/A	2.813	2.396	3.181	2.555	1.805	1.197	0.662336	-0.594365
	DN64951_c0_g1		N/A	0.31	0.206	0.3	0.62	0.573	0.421	1.97794	0.984
	DN95428_c0_g1		N/A	0.755	1.066	0.756	0.306	0.066	0.159	0.206054	-2.27891
Aldehyde dehydrogenase	DN52028_c0_g1		N/A	2.513	1.686	3.419	2.916	3.553	3.742	1.34038	0.42264
	DN74760_c0_g1		N/A	0.196	0.436	0.736	0.509	0.658	0.561	1.26316	0.337035
	DN91781_c0_g1		N/A	1.334	0.94	1.119	1.713	1.636	1.132	1.32066	0.401259
	DN134572_c0_g1		N/A	0.196	0.229	0.207	0.352	0.132	0	0.765823	-0.384918
Aldehyde-alcohol dehydrogenase	DN112942_c0_g1		N/A	3.888	3.016	4.165	5.027	4.559	5.154	1.33165	0.413212
	DN112942_c0_g2		N/A	27.062	13.771	23.787	22.156	27.729	28.605	1.21464	0.280528
	DN112942_c0_g3		N/A	3.95	3.325	4.196	5.426	5.076	4.855	1.33877	0.420905
	DN119737_c0_g1		N/A	0.962	0	0.29	0.083	0.357	0.804	0.99361	-0.00924808
	DN47216_c0_g1		N/A	1.324	0.505	1.378	1.25	1.983	2.273	1.71687	0.77978
	DN87818_c0_g1		N/A	0.807	0.814	0.964	1.815	1.701	1.02	1.75474	0.811256
	DN90144_c0_g1		N/A	3.319	1.754	4.434	3.648	5.217	6.071	1.57105	0.651732
	DN112690_c0_g1		N/A	4.746	1.582	5.077	4.731	6.533	8.55	1.73731	0.796854
	DN112942_c0_g4		N/A	2.502	0.688	1.699	2.657	3.262	3.199	1.865	0.899178
Short-chain dehydrogenases/reductase	DN22296_c0_g1		N/A	0.838	0.298	0.135	0.241	0.479	0.393	0.875688	-0.19151
	DN86738_c0_g1		N/A	0.145	0.103	0.166	0.685	0.498	0.43	3.89614	1.96204
Aldo-keto reductase	DN59105_c0_g1		N/A	1.541	1.17	0.912	2.25	2.331	1.731	1.7422	0.800912
	DN93529_c0_g1		N/A	0.496	0.883	0.642	2.342	2.124	1.225	2.81593	1.49361
	DN103260_c0_g1		N/A	0.455	0.401	0.269	0.259	0.226	0.299	0.696889	-0.520999
	DN104425_c0_g1		N/A	1.324	2.477	1.627	3.157	2.247	1.543	1.27985	0.355969
	DN108454_c0_g1		N/A	3.02	3.107	2.373	10.749	10.998	7.24	3.41024	1.76987
	DN112241_c0_g1		N/A	2.989	2.821	3.419	4.324	6.166	6.95	1.8897	0.918154
Carboxylesterase	DN106238_c0_g1		N/A	2.099	1.342	1.171	1.287	1.25	1.141	0.797485	-0.326471
Glutathione peroxidase	DN40627_c0_g1		N/A	2.906	2.454	2.072	1.25	1.147	1.478	0.521394	-0.939554
Peroxidase	DN92095_c0_g1		N/A	0	32.999	0	0	0	0	0	N/A
	DN106192_c0_g1		N/A	0	58.741	0	0.037	0.038	0	0.00127679	-9.61326
	DN122738_c0_g1		N/A	0.093	0.241	0.062	0.12	0.15	0.122	0.989899	-0.0146468
	DN111237_c0_g1		N/A	330.371	5.412	4.165	3.907	3.139	3.639	0.0314313	-4.99166
Aldose reductase	DN100806_c0_g1	Phase II	Up	0.362	0.401	0.425	4.657	4.869	3.124	10.6481	3.41253
Glutathione S-transferase	DN100157_c0_g1		N/A	1.096	1.422	1.14	1.685	1.391	1.272	1.18863	0.249297
	DN101245_c0_g1		N/A	1.189	2.029	2.445	3.916	3.703	3.938	2.04079	1.02913
	DN104128_c0_g1		N/A	3.123	3.05	2.787	6.287	6.185	4.312	1.87321	0.905516
	DN104731_c0_g1		N/A	0.9	0.963	0.767	0.944	0.874	0.739	0.972243	-0.0406106
	DN107363_c0_g1		Down	1.024	1.41	1.067	2.028	2.275	1.525	1.66467	0.735234
	DN110541_c0_g2		N/A	4.488	3.348	4.103	5.138	6.636	7.044	1.57618	0.656431
	DN110952_c0_g1		N/A	9.338	9.093	7.946	23.943	28.932	21.683	2.82663	1.49908
	DN112413_c0_g1		N/A	0	29.892	0	0	0	0	0	N/A
	DN112549_c0_g1		N/A	5.274	4.758	4.465	3.74	2.707	2.151	0.593088	-0.753681
	DN119980_c0_g1		N/A	5.543	5.343	5.905	5.027	4.549	5.369	0.89006	-0.168025
	DN124915_c0_g1		N/A	3.65	2.614	2.611	3.824	2.914	2.114	0.997408	-0.00374367
	DN131157_c0_g1		N/A	1.882	2.018	1.492	1.5	1.382	1.871	0.881491	-0.181982
	DN133281_c0_g1		N/A	0	3.153	0	0	0	0	0	N/A
	DN59411_c0_g1		N/A	3.495	2.545	2.186	1.546	2.171	2.479	0.753221	-0.408854
	DN74923_c0_g1		N/A	0	14.539	0	0	0	0	0	N/A
	DN91861_c0_g1		N/A	1.055	0.745	0.601	0.463	0.489	0.486	0.598917	-0.739572
	DN96444_c0_g1		N/A	26.628	20.914	19.767	34.173	34.243	30.036	1.46269	0.548621
	DN97324_c0_g1		N/A	1.923	1.571	1.274	3.129	2.472	1.918	1.57697	0.657157
	DN98175_c0_g1		N/A	2.079	1.605	1.606	2.139	3.976	4.144	1.93932	0.95555
	DN99966_c0_g1		N/A	2.544	1.995	2.538	3.12	2.707	2.918	1.23569	0.30532
UDP-glucuronosyltransferase	DN101672_c0_g1		Up	1.065	0.86	0.87	9.203	9.559	6.707	9.11234	3.18782
	DN102763_c0_g1		Up	0.941	1.158	0.922	6.287	7.228	7.249	6.87322	2.78099
	DN56798_c0_g1		Up	0.114	0.367	0.363	3.463	2.923	2.647	10.7026	3.41989
	DN70095_c0_g1		N/A	0.176	0	0.269	1.083	2.03	1.88	11.2202	3.48803
	DN106481_c0_g1		N/A	13.733	15.227	18.162	38.747	62.695	69.791	3.63382	1.86149
	DN101802_c0_g1		Up	1.282	0.791	1.223	9.453	11.449	13.133	10.3262	3.36823
	DN86799_c0_g1		N/A	0.579	0.034	0.104	0.352	0.573	1.076	2.79079	1.48068
	DN93934_c0_g1		N/A	0	1.812	0.394	0.361	0.827	1.113	1.04306	0.0608282
	DN99331_c0_g1		N/A	0.434	0.333	0.155	0.722	0.714	0.645	2.25705	1.17444
MATE efflux family protein 4, chloroplastic	DN91924_c0_g1	MATE transporters	N/A	0.651	0.092	0.932	1.898	1.325	1.712	2.94627	1.55889
	DN98305_c0_g1		N/A	1.634	0.401	0.881	1.935	1.965	1.197	1.74794	0.805658
	DN52097_c0_g1		N/A	0.3	0.218	0.332	0.185	0.536	0.44	1.36588	0.449833
	DN101095_c0_g1		N/A	1.655	1.72	1.948	3.083	2.153	0.758	1.12606	0.17128
MATE efflux family protein 2, chloroplastic	DN21976_c0_g1		N/A	1.603	0.998	1.751	2.583	2.049	2.731	1.69187	0.758615
	DN125047_c0_g1		N/A	3.092	2.419	3.108	2.833	2.566	3.04	0.979116	-0.0304484
Multidrug and toxin extrusion protein 2	DN188_c0_g1		N/A	1.996	1.961	1.098	1.963	1.429	1.478	0.963403	-0.0537893
	DN3926_c0_g1		N/A	2.875	4.002	2.725	4.074	3.205	2.759	1.04541	0.064065
	DN32461_c0_g1		N/A	2.141	0.355	0.642	1.268	1.175	1.497	1.25558	0.32835
	DN90045_c0_g1		N/A	2.968	1.869	1.813	1.565	1.758	1.618	0.743008	-0.428551
	DN94117_c0_g1		N/A	1.127	0.229	0.342	0.833	0.714	0.402	1.14782	0.198898
	DN127111_c0_g1		N/A	0	0.631	0.373	0	0.357	0.748	1.1006	0.138287
ABC transporter	DN106863_c0_g1	ABC transporters	N/A	1.417	0.871	1.16	2.25	2.209	1.384	1.69461	0.76095
	DN108970_c0_g1		N/A	1.106	0.401	1.067	1.426	2.312	2.666	2.48796	1.31496
	DN110140_c0_g1		N/A	1.675	1.112	1.295	2.879	3.873	3.76	2.57521	1.36469
	DN111974_c0_g1		N/A	20.764	13.805	18.586	15.304	18.837	20.345	1.02504	0.0356802

## Sheet: Table S3C
Gene description	Unigene IDs	Expression	Readcount						Foldchange	log2 Foldchange (FDR)
			Cvel_cont1	Cvel_cont2	Cvel_cont3	Cvel_mer1	Cvel_mer2	Cvel_mer3	Cvel_mer vs Cvel_cont
Heme oxygenase 1, chloroplastic	DN93254_c0_g1	N/A	0.434	0.298	0.383	0.472	0.508	0.159	1.02152	0.030724
glutathione synthase	DN110990_c0_g1	Up	7.042	4.781	5.325	12.268	15.256	14.667	2.4604	1.29889
	DN40080_c0_g1	N/A	0.114	0.298	0.383	1.213	0.996	0.496	3.40252	1.7666
	DN55194_c0_g1	N/A	0.641	0.161	0.145	0.204	0.771	0.505	1.56283	0.644161
Heat shock 70 kDa protein	DN113480_c11_g1	Up	3.867	2.087	3.315	14.508	16.111	15.939	5.02298	2.32854
	DN20133_c0_g1	Up	2.854	0.883	1.844	7.805	10.969	7.642	4.7332	2.24282
	DN10977_c0_g1	N/A	0	1.674	0	0	0	0	0	N/A
	DN14573_c0_g1	N/A	0	3.646	0	0	0	0	0	N/A
	DN29478_c0_g1	N/A	0.507	0.034	0	0.518	0.188	0.103	1.49538	0.580511
	DN101964_c2_g1	N/A	193.312	161.844	178.653	528.616	706.343	577.404	3.39515	1.76348
	DN113480_c18_g3	N/A	186.064	115.498	136.331	271.312	333.874	313.196	2.09727	1.06852
	DN110050_c0_g1	N/A	0	44.328	0	0	0	0	0	N/A
	DN113380_c0_g1	N/A	0	36.875	0	0.019	0.019	0	0.00103051	-9.92243
	DN113380_c0_g2	N/A	0	63.786	0	0.028	0.028	0	0.000877936	-10.1536
	DN113480_c11_g1	Up	3.867	2.087	3.315	14.508	16.111	15.939	5.02298	2.32854
	DN113480_c12_g1	N/A	8.635	6.731	6.009	19.443	20.181	16.304	2.61651	1.38765
	DN113480_c14_g1	Up	0.682	1.445	0.673	6.62	5.339	4.004	5.70107	2.51123
	DN113480_c17_g1	N/A	47.423	32.243	35.919	110.065	145.854	123.419	3.2819	1.71453
	DN113480_c18_g1	N/A	16.814	12.464	12.515	32.905	38.538	31.29	2.45814	1.29757
	DN113480_c18_g2	N/A	18.82	11.202	15.976	37.654	51.294	47.585	2.96824	1.56961
	DN113480_c18_g3	N/A	186.064	115.498	136.331	271.312	333.874	313.196	2.09727	1.06852
	DN113480_c18_g4	N/A	80.649	63.144	68.015	156.173	188.472	152.491	2.34711	1.23088
	DN113480_c19_g1	N/A	14.767	18.598	14.639	31.405	34.177	22.6	1.83697	0.87733
	DN113480_c4_g1	N/A	23.102	18.277	20.358	40.265	44.545	30.579	1.86904	0.902298
	DN113480_c8_g1	N/A	778.71	520.445	622.207	1113.7	1520.12	1290.9	2.04268	1.03046
	DN120768_c0_g1	N/A	0	1.605	0	0	0	0	0	N/A
	DN121619_c0_g1	N/A	0	3.807	0	0	0	0	0	N/A
	DN128677_c0_g1	N/A	0	0.516	0	0	0	0	0	N/A
	DN35820_c0_g1	N/A	0	7.763	0	0	0	0	0	N/A
	DN65708_c2_g1	N/A	55.489	42.929	48.755	160.617	170.857	116.974	3.04708	1.60743
	DN79141_c0_g1	N/A	14.736	11.512	9.645	44.015	50.203	36.35	3.6377	1.86303
	DN83990_c0_g1	N/A	235.938	171.613	224.476	355.037	489.701	416.821	1.99605	0.99715
	DN24469_c0_g1	N/A	0.196	0.264	0.28	0.074	0.291	0.29	0.885135	-0.17603
	DN114057_c0_g1	N/A	0.651	0	0.218	0.046	0	0.047	0.10702	-3.22405
	DN103962_c0_g1	N/A	3.836	0.963	5.45	3.037	3.553	6.417	1.2691	0.343805
	DN56339_c0_g1	N/A	1.727	0.78	1.077	1.231	1.748	1.852	1.34794	0.430751
	DN76543_c0_g1	N/A	1.241	0.803	1.109	2	1.927	2.02	1.88614	0.915437
	DN85949_c0_g1	N/A	0.445	0.126	0.435	0.454	0.677	0.851	1.97018	0.978327
	DN90840_c0_g1	N/A	0.703	0.447	1.254	0.889	1.081	1.328	1.37188	0.456155
	DN98499_c0_g1	N/A	0.517	0.287	0.508	0.824	1.419	1.085	2.53659	1.34289
	DN43326_c0_g1	N/A	0.776	0.917	0.943	2.703	2.491	1.628	2.58801	1.37184
	DN78427_c0_g1	N/A	2.285	1.043	2.145	2.12	1.692	1.693	1.00585	0.00841071
	DN129998_c0_g1	N/A	0	5.767	0	0	0	0	0	N/A
heat shock protein 3	DN55146_c0_g1	N/A	0.651	0.241	0.435	0.768	2.35	2.123	3.94951	1.98167
	DN95180_c0_g1	N/A	0.196	0.183	0.104	0.704	1.119	0.58	4.97516	2.31474
	DN109213_c0_g1	N/A	0.538	0.275	0.228	2.204	2.425	1.89	6.26225	2.64668
Heat shock protein 90	DN105467_c0_g1	N/A	8.717	7.625	11.272	8.731	9.08	11.393	1.05758	0.0807661
	DN106004_c0_g1	N/A	3.444	2.637	4.206	3.222	3.149	4.004	1.00855	0.012289
	DN112471_c0_g1	N/A	6.039	4.942	5.574	5.564	5.546	5.931	1.02936	0.041743
	DN113754_c0_g1	N/A	0	2.201	0	0	0	0	0	N/A
	DN59179_c0_g1	N/A	0.951	0.229	0.798	0.889	0.893	0.73	1.26997	0.344794
	DN99869_c0_g1	N/A	0	34.123	0	0	0	0	0	N/A
	DN5660_c0_g1	N/A	0	2.5	0	0	0	0	0	N/A
	DN16685_c0_g1	N/A	0	6.283	0	0	0	0	0	N/A
Glyoxalase (GLY)	DN56749_c0_g1	N/A	3.743	1.502	3.191	4	7.21	10.402	2.56188	1.3572
	DN85055_c0_g1	N/A	6.07	5.481	5.978	5.49	5.377	6.754	1.00525	0.00755211
	DN112263_c0_g1	N/A	8.128	10.491	8.786	10.407	8.977	6.782	0.954789	-0.0667457
