# Supplementary material
Source: Preprints.org preprint supplement (doi:10.20944/preprints201909.0251.v1)

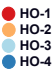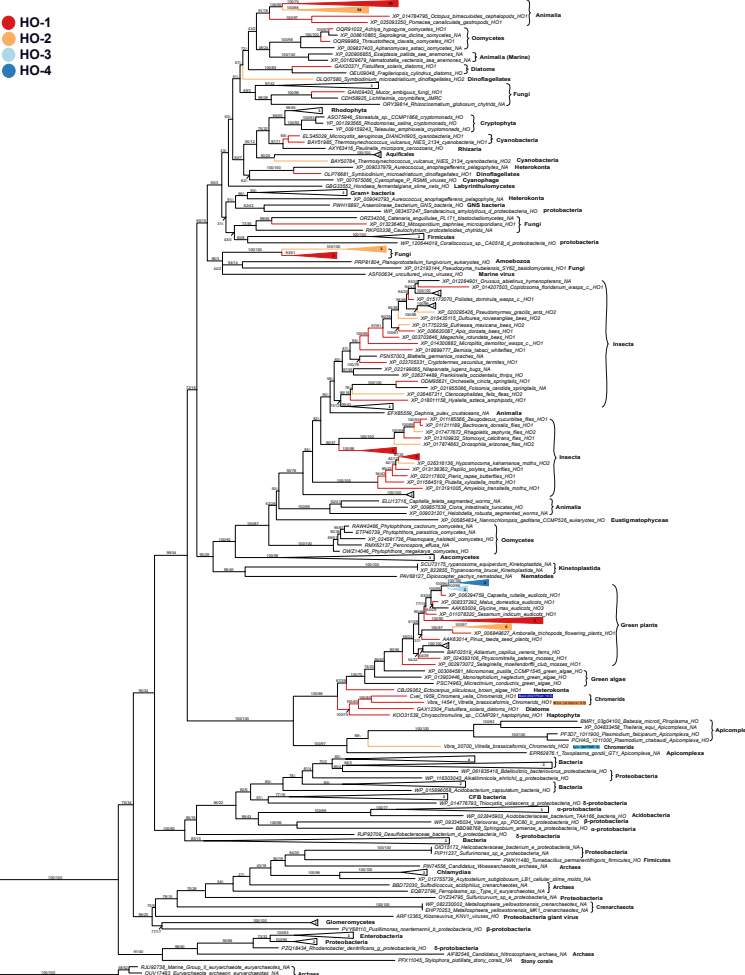

Heme Oxygenase (HO)

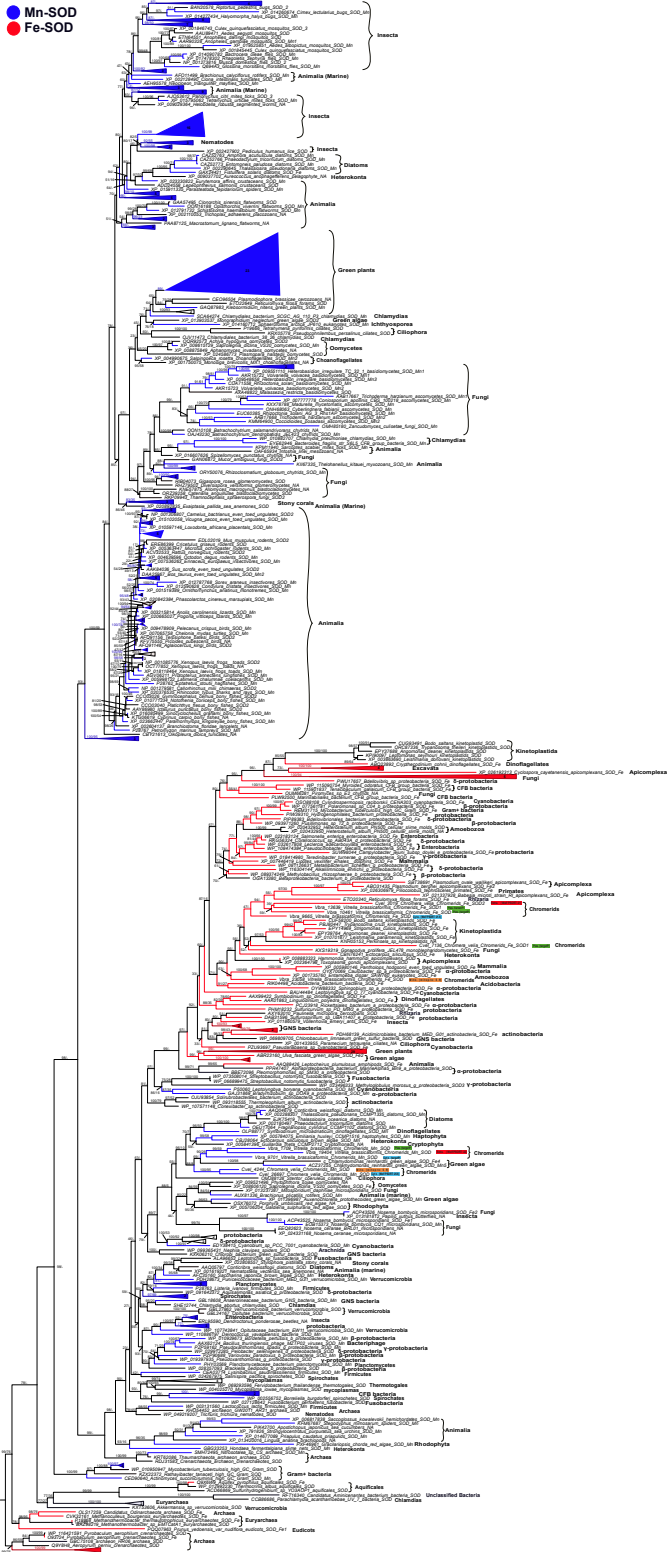

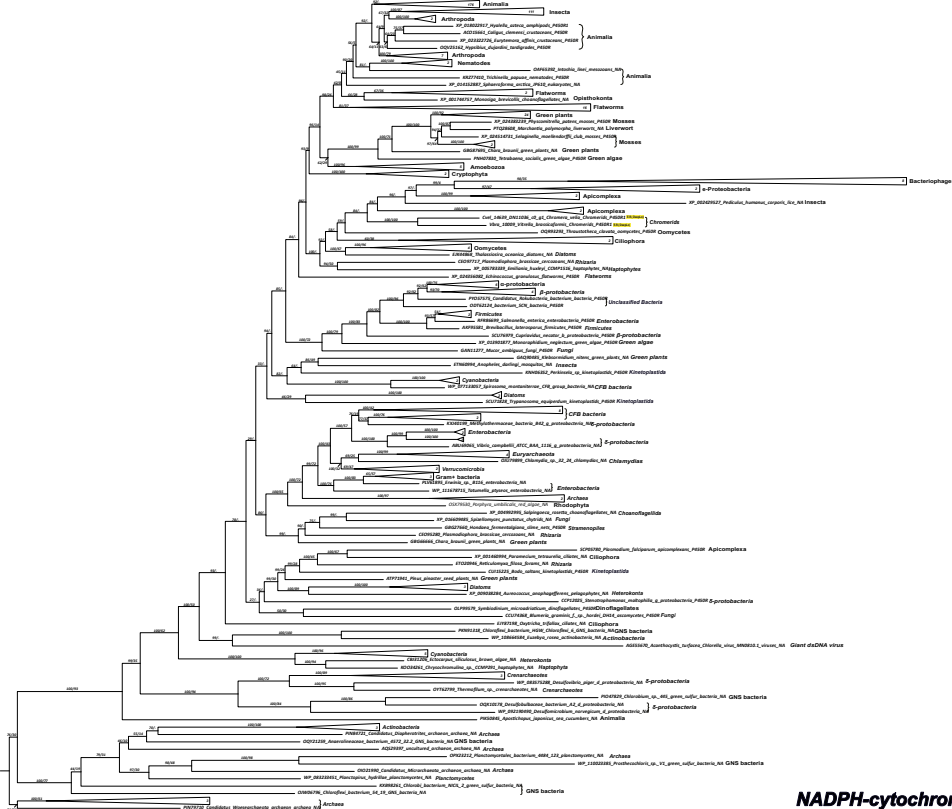

**NADPH-cytochrome P450 reductase (P450R)**

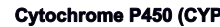

Supplement: Supplementary file 1 [file supplementary]

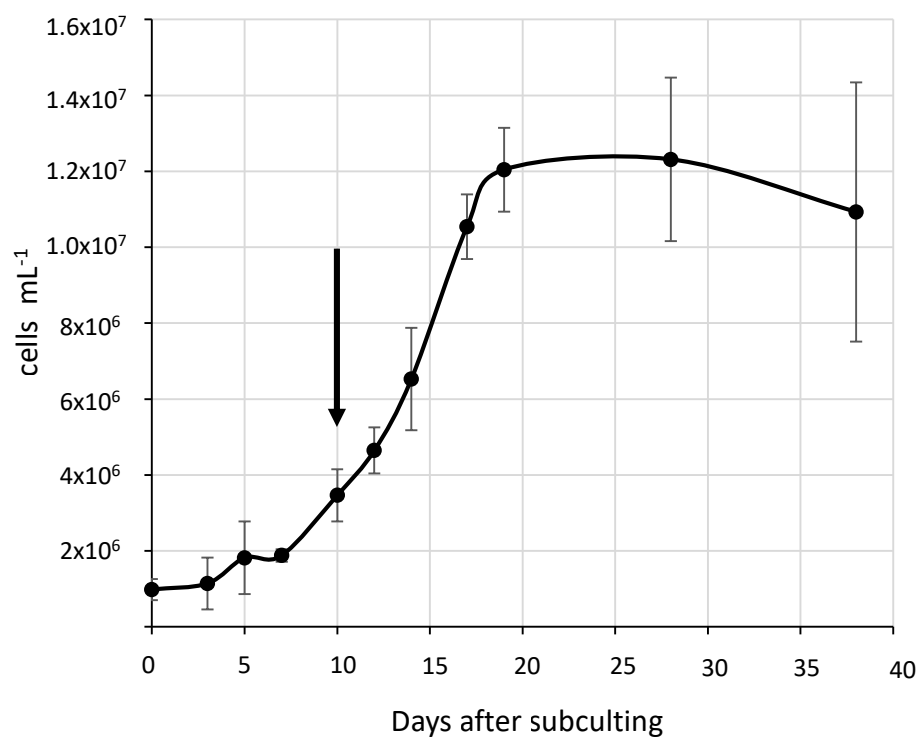

Supplement: Supplementary file 2 [file supplementary]
